# Supplementary material
Source: PubMed Central journal article supplement (PMC5656176)
Supplement: NIHMS74491-supplement-Supp_data.pdf [file NIHMS74491-supplement-Supp_data.pdf]

## SUPPORTING INFORMATION

**5-(4,6-Dimorpholino-1,3,5-triazin-2-yl)-4-(trifluoromethyl)pyridin-2-amine (PQR309): a Potent, Brain-Penetrant, Orally Bioavailable, pan-Class I PI3K/mTOR Inhibitor as Clinical Candidate in Oncology**

Florent Beaufils<sup>1,†,§</sup>, Natasa Cmiljanovic<sup>1,†,§</sup>, Vladimir Cmiljanovic<sup>1,†,§</sup>, Thomas Bohnacker<sup>1</sup>, Anna Melone<sup>1</sup>, Romina Marone<sup>1</sup>, Eileen Jackson<sup>1</sup>, Xuxiao Zhang<sup>2</sup>, Alexander Sele<sup>1</sup>, Chiara Borsari<sup>1</sup>, Jürgen Mestan<sup>3</sup>, Paul Hebeisen<sup>3</sup>, Petra Hillmann<sup>3</sup>, Bernd Giese<sup>4,††</sup>, Marketa Zvelebil<sup>1</sup>, Dorian Fabbro<sup>3</sup>, Roger L. Williams<sup>2</sup>, Denise Rageot<sup>1,\*</sup>, Matthias P. Wymann<sup>1,\*</sup>

<sup>1</sup>Department of Biomedicine, University of Basel, Mattenstrasse 28, 4058 Basel, Switzerland;

<sup>2</sup>MRC Laboratory of Molecular Biology, Francis Crick Avenue, Cambridge CB2 0QH, UK;

<sup>3</sup>PIQUR Therapeutics AG, Hochbergerstrasse 60C, 4057 Basel, Switzerland;

<sup>4</sup>Department of Chemistry, University of Basel, St. Johannis-Ring 19, 4056 Basel, Switzerland.

*Current address:*

<sup>†</sup>PIQUR Therapeutics AG, Basel, Switzerland;

<sup>††</sup>Department of Chemistry, University of Fribourg, Fribourg, Switzerland.

<sup>§</sup>These authors contributed equally to this work.

*\*Correspondence to:*

Matthias.Wymann@UniBas.CH and Denise.Rageot@UniBas.CH

Dept. Biomedicine, University of Basel

Mattenstrasse 28

4058 Basel, Switzerland

Tel. +41 61 207 5046; Fax. +41 61 207 3566

**Overview, Summary**

|                                                                                   | <b>page</b>    |
|-----------------------------------------------------------------------------------|----------------|
| <b>Supplementary Tables and Figures</b>                                           | <b>3 - 24</b>  |
| Table S1: X-Ray crystallography data and refinement                               | 3              |
| Figure S1: KINOMEScan data of PI3K inhibitors                                     | 4              |
| Table S2: raw data KINOMEScan                                                     | 5 - 16         |
| Table S3: anti-proliferative action of <b>1</b> (PQR309) in four cell line panels | 17 - 19        |
| Table S4: in vitro pharmacology I of PQR309                                       | 20             |
| Table S5: in vitro pharmacology II of PQR309                                      | 21             |
| Table S6: safety profile of PQR309                                                | 22             |
| Table S7: solubility of PI3K inhibitors                                           | 23             |
| Figure S2: Intermittent dosing of PQR309 in tumor bearing rats                    | 24             |
| <b><sup>1</sup>H NMR Spectra</b>                                                  | <b>25 - 33</b> |
| <b><sup>19</sup>F{<sup>1</sup>H} NMR Spectra</b>                                  | <b>34 - 37</b> |
| <b><sup>13</sup>C{<sup>1</sup>H} NMR Spectra</b>                                  | <b>38 - 45</b> |
| <b>ESI-HRMS Spectra</b>                                                           | <b>46 - 52</b> |
| <b>MALDI-MS Spectra</b>                                                           | <b>53</b>      |
| <b>HPLC Chromatograms</b>                                                         | <b>54 – 60</b> |
| <b>Chemical Formulas, Compound Overview</b>                                       | <b>61</b>      |

**Table S1:** Data collection and refinement statistics of the PQR309 - PI3K $\gamma$  complex

|                                   |                       |
|-----------------------------------|-----------------------|
| Space group                       |                       |
| Cell dimensions                   |                       |
| <i>a, b, c</i> (Å)                | 43.1, 86.7, 86.7      |
| $\alpha, \beta, \gamma$ (°)       | 118.1, 99.6, 95.4     |
| Resolution (Å)                    | 61.0-2.70 (2.85-2.70) |
| $R_{\text{sym}}$                  | 0.062 (0.49)          |
| $I/\sigma I$                      | 12.6 (2.4)            |
| Completeness (%)                  | 97.0 (92.9)           |
| Redundancy                        | 3.4 (3.3)             |
| <b>Refinement</b>                 |                       |
| Resolution (Å)                    |                       |
| No. reflections (free)            | 24405 (1269)          |
| $R_{\text{work}}/R_{\text{free}}$ | 0.19/0.26             |
| No. atoms                         |                       |
| Protein                           | 6791                  |
| Ligand/ion                        | 39                    |
| Water                             | 36                    |
| B-factors                         |                       |
| Protein                           | 64                    |
| Ligand/ion                        | 69                    |
| Water                             | 53                    |
| R.m.s deviations                  |                       |
| Bond lengths (Å)                  | 0.02                  |
| Bond angles (°)                   | 2.0                   |

The coordinates of the PQR309-PI3K $\gamma$  complex are deposited under the PDB ID 5OQ4

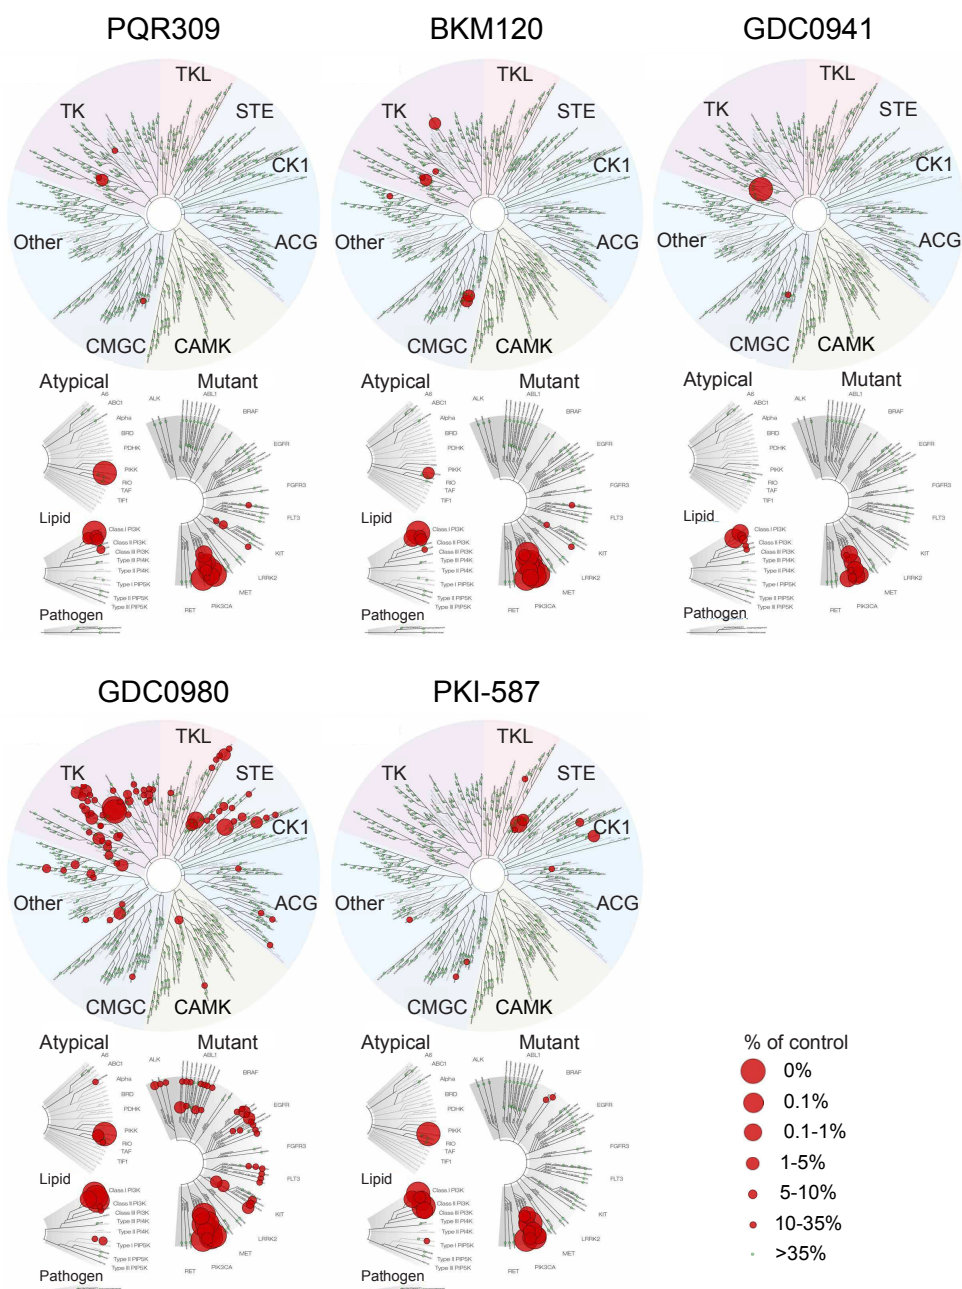

**Figure S1.** TREEspot™ data visualization of KINOMEScan interactions of indicated PI3K inhibitors. Kinases are organized according to phylogeny and into kinase families, including atypical kinases, lipid kinases, mutated kinases and some pathogen-derived kinases. Kinases targeted by indicated compounds are marked with red circles, where increasing circle size indicates a higher-affinity. AGC: PKA, PKG and PKC kinases; CAMK: Calcium- Calmodulin-dependent protein kinases; CK1: Casein kinase 1; CMGC: CDK, MAPK, GSK3, CLK family kinases; STE: Homologs of yeast Sterile 7, Sterile 11, Sterile 20 kinases; TK: Tyrosine kinases; TKL: Tyrosine kinase-like. The raw data used for the TREEspot™ representation is shown in Table S2.

**Table S2: Kinase Interactions of PQR309 and Reference Compounds at 10  $\mu$ M (KINOMEscan™)**

| KINOMEscan Gene Symbol        | PQR309 | BKM120 | GDC0941 | GDC0980 | PKI-587 |
|-------------------------------|--------|--------|---------|---------|---------|
|                               | %      | %      | %       | %       | %       |
| AAK1                          | 83.0   | 84.0   | 100.0   | 50.0    | 99.0    |
| ABL1(E255K)-phosphorylated    | 83.0   | 62.0   | 100.0   | 24.0    | 100.0   |
| ABL1(F317I)-nonphosphorylated | 100.0  | 97.0   |         | 100.0   | 100.0   |
| ABL1(F317I)-phosphorylated    | 100.0  | 94.0   | 100.0   | 80.0    | 100.0   |
| ABL1(F317L)-nonphosphorylated | 100.0  | 97.0   |         | 88.0    | 79.0    |
| ABL1(F317L)-phosphorylated    | 66.0   | 100.0  | 100.0   | 47.0    | 100.0   |
| ABL1(H396P)-nonphosphorylated | 92.0   | 82.0   |         | 2.0     | 100.0   |
| ABL1(H396P)-phosphorylated    | 96.0   | 100.0  | 100.0   | 18.0    | 99.0    |
| ABL1(M351T)-phosphorylated    | 100.0  | 100.0  | 100.0   | 20.0    | 100.0   |
| ABL1(Q252H)-nonphosphorylated | 89.0   | 61.0   |         | 7.5     | 100.0   |
| ABL1(Q252H)-phosphorylated    | 88.0   | 100.0  | 100.0   | 13.0    | 94.0    |
| ABL1(T315I)-nonphosphorylated | 100.0  | 92.0   |         | 34.0    | 100.0   |
| ABL1(T315I)-phosphorylated    | 80.0   | 100.0  | 100.0   | 16.0    | 100.0   |
| ABL1(Y253F)-phosphorylated    | 100.0  | 100.0  | 100.0   | 21.0    | 97.0    |
| ABL1-nonphosphorylated        | 62.0   | 69.0   |         | 25.0    | 100.0   |
| ABL1-phosphorylated           | 86.0   | 76.0   | 100.0   | 23.0    | 99.0    |
| ABL2                          | 95.0   | 82.0   | 100.0   | 61.0    | 92.0    |
| ACVR1                         | 77.0   | 63.0   | 100.0   | 89.0    | 75.0    |
| ACVR1B                        | 99.0   | 94.0   | 100.0   | 100.0   | 100.0   |
| ACVR2A                        | 89.0   | 99.0   | 100.0   | 100.0   | 94.0    |
| ACVR2B                        | 76.0   | 63.0   | 100.0   | 86.0    | 83.0    |
| ACVRL1                        | 89.0   | 98.0   | 100.0   | 91.0    | 100.0   |
| ADCK3                         | 80.0   | 70.0   | 100.0   | 78.0    | 60.0    |
| ADCK4                         | 99.0   | 80.0   | 100.0   | 38.0    | 93.0    |
| AKT1                          | 75.0   | 72.0   | 100.0   | 96.0    | 93.0    |
| AKT2                          | 92.0   | 100.0  | 100.0   | 96.0    | 100.0   |
| AKT3                          | 97.0   | 72.0   | 100.0   | 100.0   | 95.0    |
| ALK                           | 94.0   | 72.0   | 100.0   | 17.0    | 80.0    |
| ALK(C1156Y)                   | 95.0   | 76.0   |         | 9.5     | 95.0    |
| ALK(L1196M)                   | 95.0   | 74.0   |         | 28.0    | 100.0   |
| AMPK-alpha1                   | 78.0   | 92.0   | 100.0   | 74.0    | 76.0    |
| AMPK-alpha2                   | 100.0  | 82.0   | 100.0   | 87.0    | 100.0   |
| ANKK1                         | 79.0   | 96.0   | 100.0   | 23.0    | 86.0    |
| ARK5                          | 97.0   | 80.0   | 100.0   | 72.0    | 82.0    |
| ASK1                          | 55.0   | 80.0   | 100.0   | 83.0    | 95.0    |
| ASK2                          | 100.0  | 96.0   | 100.0   | 72.0    | 100.0   |
| AURKA                         | 37.0   | 29.0   | 100.0   | 77.0    | 95.0    |
| AURKB                         | 81.0   | 94.0   | 100.0   | 100.0   | 100.0   |
| AURKC                         | 80.0   | 85.0   | 100.0   | 100.0   | 95.0    |

| KINOMEScan Gene Symbol | PQR309 | BKM120 | GDC0941 | GDC0980 | PKI-587 |
|------------------------|--------|--------|---------|---------|---------|
|                        | %      | %      | %       | %       | %       |
| AXL                    | 86.0   | 60.0   | 100.0   | 11.0    | 81.0    |
| BIKE                   | 87.0   | 88.0   | 100.0   | 78.0    | 80.0    |
| BLK                    | 61.0   | 76.0   | 100.0   | 11.0    | 100.0   |
| BMPR1A                 | 100.0  | 96.0   | 100.0   | 73.0    | 72.0    |
| BMPR1B                 | 67.0   | 100.0  | 100.0   | 72.0    | 99.0    |
| BMPR2                  | 82.0   | 100.0  | 100.0   | 93.0    | 97.0    |
| BMX                    | 100.0  | 78.0   | 100.0   | 34.0    | 93.0    |
| BRAF                   | 75.0   | 63.0   | 100.0   | 78.0    | 20.0    |
| BRAF(V600E)            | 65.0   | 46.0   | 100.0   | 77.0    | 14.0    |
| BRK                    | 100.0  | 96.0   | 100.0   | 57.0    | 84.0    |
| BRSK1                  | 98.0   | 83.0   | 100.0   | 80.0    | 78.0    |
| BRSK2                  | 61.0   | 92.0   | 100.0   | 95.0    | 97.0    |
| BTK                    | 83.0   | 94.0   | 100.0   | 4.5     | 93.0    |
| BUB1                   | 100.0  | 71.0   |         | 99.0    | 100.0   |
| CAMK1                  | 76.0   | 80.0   | 100.0   | 35.0    | 77.0    |
| CAMK1D                 | 83.0   | 88.0   | 100.0   | 78.0    | 91.0    |
| CAMK1G                 | 93.0   | 88.0   | 100.0   | 67.0    | 99.0    |
| CAMK2A                 | 88.0   | 78.0   | 100.0   | 80.0    | 70.0    |
| CAMK2B                 | 92.0   | 89.0   | 100.0   | 88.0    | 92.0    |
| CAMK2D                 | 100.0  | 84.0   | 100.0   | 93.0    | 94.0    |
| CAMK2G                 | 84.0   | 81.0   | 100.0   | 77.0    | 91.0    |
| CAMK4                  | 84.0   | 100.0  | 100.0   | 76.0    | 100.0   |
| CAMKK1                 | 100.0  | 85.0   | 100.0   | 73.0    | 93.0    |
| CAMKK2                 | 100.0  | 81.0   | 100.0   | 74.0    | 98.0    |
| CASK                   | 100.0  | 89.0   |         | 86.0    | 100.0   |
| CDC2L1                 | 100.0  | 77.0   | 100.0   | 100.0   | 91.0    |
| CDC2L2                 | 100.0  | 99.0   | 100.0   | 92.0    | 100.0   |
| CDC2L5                 | 80.0   | 74.0   |         | 100.0   | 96.0    |
| CDK11                  | 70.0   | 86.0   | 100.0   | 100.0   | 92.0    |
| CDK2                   | 93.0   | 86.0   | 100.0   | 93.0    | 88.0    |
| CDK3                   | 99.0   | 91.0   | 100.0   | 96.0    | 84.0    |
| CDK4-cyclinD1          | 91.0   | 84.0   |         | 94.0    | 97.0    |
| CDK4-cyclinD3          | 97.0   | 100.0  |         | 100.0   | 100.0   |
| CDK5                   | 85.0   | 69.0   | 100.0   | 73.0    | 98.0    |
| CDK7                   | 100.0  | 100.0  | 100.0   | 45.0    | 86.0    |
| CDK8                   | 100.0  | 81.0   | 100.0   | 87.0    | 84.0    |
| CDK9                   | 70.0   | 65.0   | 100.0   | 99.0    | 96.0    |
| CDKL1                  | 93.0   | 86.0   |         | 100.0   | 100.0   |
| CDKL2                  | 100.0  | 97.0   | 100.0   | 95.0    | 85.0    |
| CDKL3                  | 85.0   | 98.0   | 100.0   | 100.0   | 99.0    |

| KINOMEScan Gene Symbol | PQR309 | BKM120 | GDC0941 | GDC0980 | PKI-587 |
|------------------------|--------|--------|---------|---------|---------|
|                        | %      | %      | %       | %       | %       |
| CDKL5                  | 83.0   | 100.0  | 100.0   | 100.0   | 100.0   |
| CHEK1                  | 84.0   | 75.0   | 100.0   | 98.0    | 98.0    |
| CHEK2                  | 100.0  | 92.0   | 100.0   | 9.1     | 93.0    |
| CIT                    | 100.0  | 72.0   | 100.0   | 37.0    | 65.0    |
| CLK1                   | 55.0   | 2.4    | 100.0   | 95.0    | 50.0    |
| CLK2                   | 84.0   | 47.0   | 25.0    | 60.0    | 90.0    |
| CLK3                   | 100.0  | 57.0   | 100.0   | 96.0    | 100.0   |
| CLK4                   | 32.0   | 2.2    | 100.0   | 87.0    | 29.0    |
| CSF1R                  | 7.4    | 15.0   | 100.0   | 12.0    | 98.0    |
| CSF1R-autoinhibited    | 2.8    | 3.6    |         | 19.0    | 100.0   |
| CSK                    | 76.0   | 88.0   | 100.0   | 25.0    | 81.0    |
| CSNK1A1                | 91.0   | 70.0   |         | 97.0    | 100.0   |
| CSNK1A1L               | 95.0   | 90.0   | 100.0   | 100.0   | 99.0    |
| CSNK1D                 | 76.0   | 74.0   | 100.0   | 90.0    | 83.0    |
| CSNK1E                 | 78.0   | 43.0   | 100.0   | 83.0    | 3.2     |
| CSNK1G1                | 100.0  | 77.0   | 100.0   | 80.0    | 75.0    |
| CSNK1G2                | 82.0   | 100.0  | 100.0   | 73.0    | 56.0    |
| CSNK1G3                | 100.0  | 90.0   | 100.0   | 85.0    | 81.0    |
| CSNK2A1                | 59.0   | 57.0   | 100.0   | 97.0    | 91.0    |
| CSNK2A2                | 100.0  | 69.0   | 100.0   | 89.0    | 95.0    |
| CTK                    | 91.0   | 100.0  | 100.0   | 57.0    | 97.0    |
| DAPK1                  | 86.0   | 77.0   | 100.0   | 82.0    | 89.0    |
| DAPK2                  | 94.0   | 79.0   | 100.0   | 75.0    | 81.0    |
| DAPK3                  | 94.0   | 68.0   | 100.0   | 78.0    | 78.0    |
| DCAMKL1                | 84.0   | 50.0   | 100.0   | 70.0    | 73.0    |
| DCAMKL2                | 100.0  | 95.0   | 100.0   | 100.0   | 100.0   |
| DCAMKL3                | 85.0   | 100.0  | 100.0   | 100.0   | 100.0   |
| DDR1                   | 65.0   | 53.0   | 100.0   | 90.0    | 69.0    |
| DDR2                   | 100.0  | 100.0  | 100.0   | 66.0    | 73.0    |
| DLK                    | 81.0   | 98.0   | 100.0   | 15.0    | 87.0    |
| DMPK                   | 100.0  | 84.0   | 100.0   | 40.0    | 97.0    |
| DMPK2                  | 81.0   | 81.0   | 100.0   | 100.0   | 100.0   |
| DRAK1                  | 97.0   | 96.0   | 100.0   | 67.0    | 91.0    |
| DRAK2                  | 79.0   | 100.0  | 100.0   | 63.0    | 63.0    |
| DYRK1A                 | 100.0  | 40.0   | 100.0   | 96.0    | 90.0    |
| DYRK1B                 | 61.0   | 68.0   | 100.0   | 100.0   | 97.0    |
| DYRK2                  | 100.0  | 76.0   | 100.0   | 76.0    | 94.0    |
| EGFR                   | 73.0   | 91.0   | 100.0   | 11.0    | 78.0    |
| EGFR(E746-A750del)     | 95.0   | 90.0   | 100.0   | 14.0    | 79.0    |
| EGFR(G719C)            | 54.0   | 62.0   | 100.0   | 30.0    | 98.0    |

| KINOMEScan Gene Symbol    | PQR309 | BKM120 | GDC0941 | GDC0980 | PKI-587 |
|---------------------------|--------|--------|---------|---------|---------|
|                           | %      | %      | %       | %       | %       |
| EGFR(G719S)               | 64.0   | 100.0  | 100.0   | 40.0    | 100.0   |
| EGFR(L747-E749del, A750P) | 85.0   | 86.0   | 100.0   | 17.0    | 98.0    |
| EGFR(L747-S752del, P753S) | 90.0   | 88.0   | 100.0   | 31.0    | 77.0    |
| EGFR(L747-T751del,Sins)   | 84.0   | 72.0   | 100.0   | 25.0    | 100.0   |
| EGFR(L858R)               | 90.0   | 90.0   | 100.0   | 18.0    | 100.0   |
| EGFR(L858R,T790M)         | 78.0   | 79.0   | 100.0   | 3.0     | 85.0    |
| EGFR(L861Q)               | 63.0   | 88.0   | 100.0   | 15.0    | 100.0   |
| EGFR(S752-I759del)        | 73.0   | 68.0   | 100.0   | 22.0    | 100.0   |
| EGFR(T790M)               | 92.0   | 84.0   |         | 4.3     | 100.0   |
| EIF2AK1                   | 100.0  | 97.0   |         | 100.0   | 100.0   |
| EPHA1                     | 76.0   | 85.0   | 100.0   | 72.0    | 100.0   |
| EPHA2                     | 100.0  | 79.0   | 100.0   | 100.0   | 100.0   |
| EPHA3                     | 79.0   | 88.0   | 100.0   | 50.0    | 99.0    |
| EPHA4                     | 83.0   | 92.0   | 100.0   | 98.0    | 92.0    |
| EPHA5                     | 98.0   | 73.0   | 100.0   | 78.0    | 96.0    |
| EPHA6                     | 89.0   | 40.0   | 100.0   | 100.0   | 90.0    |
| EPHA7                     | 93.0   | 92.0   | 100.0   | 88.0    | 89.0    |
| EPHA8                     | 80.0   | 97.0   | 100.0   | 80.0    | 78.0    |
| EPHB1                     | 70.0   | 87.0   | 100.0   | 92.0    | 92.0    |
| EPHB2                     | 95.0   | 100.0  | 100.0   | 78.0    | 92.0    |
| EPHB3                     | 84.0   | 44.0   | 100.0   | 100.0   | 79.0    |
| EPHB4                     | 84.0   | 48.0   | 100.0   | 77.0    | 91.0    |
| EPHB6                     | 54.0   | 98.0   | 100.0   | 8.6     | 97.0    |
| ERBB2                     | 65.0   | 3.2    | 100.0   | 72.0    | 97.0    |
| ERBB3                     | 61.0   | 96.0   | 100.0   | 29.0    | 92.0    |
| ERBB4                     | 79.0   | 92.0   | 100.0   | 24.0    | 96.0    |
| ERK1                      | 77.0   | 100.0  | 100.0   | 98.0    | 100.0   |
| ERK2                      | 89.0   | 71.0   | 100.0   | 79.0    | 94.0    |
| ERK3                      | 78.0   | 100.0  | 100.0   | 100.0   | 100.0   |
| ERK4                      | 100.0  | 100.0  | 100.0   | 100.0   | 100.0   |
| ERK5                      | 86.0   | 61.0   | 100.0   | 99.0    | 82.0    |
| ERK8                      | 100.0  | 79.0   | 100.0   | 88.0    | 82.0    |
| ERN1                      | 73.0   | 76.0   | 100.0   | 73.0    | 100.0   |
| FAK                       | 79.0   | 78.0   | 100.0   | 83.0    | 99.0    |
| FER                       | 96.0   | 95.0   | 100.0   | 9.1     | 100.0   |
| FES                       | 76.0   | 28.0   | 100.0   | 94.0    | 84.0    |
| FGFR1                     | 100.0  | 85.0   | 100.0   | 100.0   | 94.0    |
| FGFR2                     | 93.0   | 64.0   | 100.0   | 100.0   | 100.0   |
| FGFR3                     | 100.0  | 81.0   | 100.0   | 91.0    | 98.0    |
| FGFR3(G697C)              | 65.0   | 100.0  | 100.0   | 87.0    | 99.0    |



| KINOMEScan Gene Symbol | PQR309 | BKM120 | GDC0941 | GDC0980 | PKI-587 |
|------------------------|--------|--------|---------|---------|---------|
|                        | %      | %      | %       | %       | %       |
| FGFR4                  | 84.0   | 99.0   | 100.0   | 89.0    | 75.0    |
| FGR                    | 86.0   | 57.0   | 100.0   | 14.0    | 83.0    |
| FLT1                   | 98.0   | 93.0   | 100.0   | 62.0    | 82.0    |
| FLT3                   | 52.0   | 54.0   | 100.0   | 30.0    | 78.0    |
| FLT3(D835H)            | 57.0   | 69.0   | 100.0   | 16.0    | 100.0   |
| FLT3(D835Y)            | 54.0   | 55.0   | 100.0   | 11.0    | 96.0    |
| FLT3(ITD)              | 90.0   | 93.0   | 100.0   | 19.0    | 97.0    |
| FLT3(K663Q)            | 69.0   | 76.0   | 100.0   | 18.0    | 89.0    |
| FLT3(N841I)            | 35.0   | 18.0   | 100.0   | 34.0    | 100.0   |
| FLT3(R834Q)            | 87.0   | 75.0   |         | 60.0    | 100.0   |
| FLT3-autoinhibited     | 78.0   | 100.0  |         | 58.0    | 100.0   |
| FLT4                   | 83.0   | 91.0   | 100.0   | 86.0    | 82.0    |
| FRK                    | 100.0  | 98.0   | 100.0   | 74.0    | 88.0    |
| FYN                    | 100.0  | 92.0   | 100.0   | 23.0    | 73.0    |
| GAK                    | 97.0   | 92.0   | 100.0   | 70.0    | 98.0    |
| GCN2(Kin.Dom.2,S808G)  | 100.0  | 89.0   | 100.0   | 3.4     | 100.0   |
| GRK1                   | 100.0  | 75.0   | 100.0   | 96.0    | 100.0   |
| GRK4                   | 91.0   | 82.0   | 100.0   | 68.0    | 60.0    |
| GRK7                   | 100.0  | 100.0  | 100.0   | 89.0    | 100.0   |
| GSK3A                  | 61.0   | 63.0   | 100.0   | 98.0    | 88.0    |
| GSK3B                  | 92.0   | 98.0   | 100.0   | 100.0   | 100.0   |
| HASPIN                 | 70.0   | 75.0   |         | 98.0    | 44.0    |
| HCK                    | 95.0   | 63.0   | 100.0   | 1.6     | 100.0   |
| HIPK1                  | 76.0   | 71.0   | 100.0   | 44.0    | 82.0    |
| HIPK2                  | 100.0  | 100.0  | 100.0   | 19.0    | 34.0    |
| HIPK3                  | 78.0   | 87.0   | 100.0   | 57.0    | 89.0    |
| HIPK4                  | 86.0   | 57.0   | 100.0   | 91.0    | 86.0    |
| HPK1                   | 66.0   | 89.0   | 100.0   | 12.0    | 67.0    |
| HUNK                   | 100.0  | 83.0   | 100.0   | 91.0    | 64.0    |
| ICK                    | 100.0  | 100.0  | 100.0   | 100.0   | 100.0   |
| IGF1R                  | 67.0   | 93.0   | 100.0   | 31.0    | 100.0   |
| IKK-alpha              | 100.0  | 100.0  | 100.0   | 94.0    | 64.0    |
| IKK-beta               | 100.0  | 100.0  | 100.0   | 100.0   | 100.0   |
| IKK-epsilon            | 100.0  | 96.0   | 100.0   | 51.0    | 85.0    |
| INSR                   | 86.0   | 80.0   | 100.0   | 7.3     | 100.0   |
| INSRR                  | 92.0   | 96.0   | 100.0   | 19.0    | 72.0    |
| IRAK1                  | 100.0  | 100.0  | 100.0   | 78.0    | 100.0   |
| IRAK3                  | 68.0   | 56.0   | 100.0   | 61.0    | 79.0    |
| IRAK4                  | 100.0  | 100.0  |         | 100.0   | 99.0    |
| ITK                    | 88.0   | 91.0   | 100.0   | 19.0    | 84.0    |

| KINOMEScan Gene Symbol       | PQR309 | BKM120 | GDC0941 | GDC0980 | PKI-587 |
|------------------------------|--------|--------|---------|---------|---------|
|                              | %      | %      | %       | %       | %       |
| JAK1(JH1domain-catalytic)    | 80.0   | 76.0   | 100.0   | 96.0    | 100.0   |
| JAK1(JH2domain-pseudokinase) | 20.0   | 56.0   | 100.0   | 0.0     | 100.0   |
| JAK2(JH1domain-catalytic)    | 88.0   | 96.0   | 100.0   | 7.4     | 100.0   |
| JAK3(JH1domain-catalytic)    | 63.0   | 58.0   | 100.0   | 8.7     | 83.0    |
| JNK1                         | 74.0   | 100.0  | 100.0   | 47.0    | 100.0   |
| JNK2                         | 89.0   | 100.0  | 100.0   | 95.0    | 100.0   |
| JNK3                         | 83.0   | 100.0  | 100.0   | 93.0    | 100.0   |
| KIT                          | 29.0   | 46.0   | 100.0   | 2.0     | 81.0    |
| KIT(A829P)                   | 85.0   | 93.0   |         | 49.0    | 97.0    |
| KIT(D816H)                   | 81.0   | 82.0   |         | 57.0    | 94.0    |
| KIT(D816V)                   | 94.0   | 73.0   | 100.0   | 40.0    | 84.0    |
| KIT(L576P)                   | 6.5    | 10.0   | 100.0   | 3.0     | 98.0    |
| KIT(V559D)                   | 21.0   | 36.0   | 100.0   | 1.1     | 94.0    |
| KIT(V559D,T670I)             | 64.0   | 66.0   | 100.0   | 5.2     | 99.0    |
| KIT(V559D,V654A)             | 45.0   | 59.0   | 100.0   | 7.6     | 87.0    |
| KIT-autoinhibited            | 17.0   | 28.0   |         | 43.0    | 100.0   |
| LATS1                        | 96.0   | 81.0   | 100.0   | 59.0    | 39.0    |
| LATS2                        | 100.0  | 74.0   | 100.0   | 96.0    | 28.0    |
| LCK                          | 93.0   | 90.0   | 100.0   | 9.5     | 93.0    |
| LIMK1                        | 97.0   | 73.0   | 100.0   | 92.0    | 87.0    |
| LIMK2                        | 62.0   | 91.0   | 100.0   | 100.0   | 100.0   |
| LKB1                         | 92.0   | 91.0   | 100.0   | 100.0   | 79.0    |
| LOK                          | 72.0   | 88.0   | 100.0   | 28.0    | 76.0    |
| LRRK2                        | 91.0   | 96.0   |         | 98.0    | 100.0   |
| LRRK2(G2019S)                | 80.0   | 90.0   |         | 82.0    | 93.0    |
| LTK                          | 86.0   | 87.0   | 100.0   | 10.0    | 76.0    |
| LYN                          | 85.0   | 100.0  | 100.0   | 43.0    | 97.0    |
| LZK                          | 97.0   | 100.0  | 100.0   | 20.0    | 95.0    |
| MAK                          | 79.0   | 81.0   | 100.0   | 91.0    | 93.0    |
| MAP3K1                       | 100.0  | 100.0  | 100.0   | 93.0    | 100.0   |
| MAP3K15                      | 100.0  | 94.0   | 100.0   | 96.0    | 100.0   |
| MAP3K2                       | 100.0  | 100.0  | 100.0   | 13.0    | 80.0    |
| MAP3K3                       | 79.0   | 97.0   | 100.0   | 10.0    | 100.0   |
| MAP3K4                       | 68.0   | 86.0   | 100.0   | 95.0    | 71.0    |
| MAP4K2                       | 90.0   | 100.0  | 100.0   | 9.8     | 90.0    |
| MAP4K3                       | 71.0   | 85.0   | 100.0   | 51.0    | 92.0    |
| MAP4K4                       | 99.0   | 80.0   | 100.0   | 78.0    | 83.0    |
| MAP4K5                       | 89.0   | 86.0   | 100.0   | 93.0    | 100.0   |
| MAPKAPK2                     | 80.0   | 100.0  | 100.0   | 96.0    | 85.0    |
| MAPKAPK5                     | 89.0   | 100.0  | 100.0   | 75.0    | 64.0    |

| KINOMEScan Gene Symbol | PQR309 | BKM120 | GDC0941 | GDC0980 | PKI-587 |
|------------------------|--------|--------|---------|---------|---------|
|                        | %      | %      | %       | %       | %       |
| MARK1                  | 75.0   | 87.0   | 100.0   | 67.0    | 97.0    |
| MARK2                  | 87.0   | 100.0  | 100.0   | 54.0    | 85.0    |
| MARK3                  | 78.0   | 100.0  | 100.0   | 67.0    | 97.0    |
| MARK4                  | 76.0   | 94.0   | 100.0   | 77.0    | 100.0   |
| MAST1                  | 100.0  | 100.0  | 100.0   | 69.0    | 94.0    |
| MEK1                   | 72.0   | 94.0   | 100.0   | 26.0    | 100.0   |
| MEK2                   | 98.0   | 92.0   | 100.0   | 7.0     | 100.0   |
| MEK3                   | 100.0  | 79.0   | 100.0   | 99.0    | 100.0   |
| MEK4                   | 100.0  | 100.0  | 100.0   | 100.0   | 100.0   |
| MEK5                   | 100.0  | 63.0   |         | 0.4     | 100.0   |
| MEK6                   | 70.0   | 75.0   | 100.0   | 68.0    | 60.0    |
| MELK                   | 64.0   | 64.0   | 100.0   | 73.0    | 76.0    |
| MERTK                  | 100.0  | 56.0   | 100.0   | 37.0    | 87.0    |
| MET                    | 60.0   | 91.0   | 100.0   | 63.0    | 95.0    |
| MET(M1250T)            | 93.0   | 63.0   | 100.0   | 83.0    | 98.0    |
| MET(Y1235D)            | 100.0  | 98.0   | 100.0   | 68.0    | 74.0    |
| MINK                   | 86.0   | 93.0   | 100.0   | 24.0    | 64.0    |
| MKK7                   | 100.0  | 100.0  |         | 89.0    | 91.0    |
| MKNK1                  | 100.0  | 100.0  | 100.0   | 100.0   | 100.0   |
| MKNK2                  | 91.0   | 61.0   | 100.0   | 100.0   | 65.0    |
| MLCK                   | 94.0   | 90.0   | 100.0   | 74.0    | 62.0    |
| MLK1                   | 87.0   | 94.0   | 100.0   | 3.2     | 97.0    |
| MLK2                   | 59.0   | 93.0   | 100.0   | 41.0    | 100.0   |
| MLK3                   | 100.0  | 97.0   | 100.0   | 17.0    | 89.0    |
| MRCKA                  | 100.0  | 91.0   | 100.0   | 88.0    | 74.0    |
| MRCKB                  | 89.0   | 82.0   | 100.0   | 94.0    | 83.0    |
| MST1                   | 83.0   | 94.0   | 100.0   | 87.0    | 84.0    |
| MST1R                  | 69.0   | 86.0   | 100.0   | 81.0    | 91.0    |
| MST2                   | 72.0   | 58.0   | 100.0   | 92.0    | 91.0    |
| MST3                   | 92.0   | 85.0   | 100.0   | 93.0    | 96.0    |
| MST4                   | 56.0   | 73.0   | 100.0   | 97.0    | 100.0   |
| MTOR                   | 0.0    | 1.8    |         | 0.1     | 0.0     |
| MUSK                   | 100.0  | 92.0   | 100.0   | 90.0    | 74.0    |
| MYLK                   | 95.0   | 63.0   | 100.0   | 73.0    | 37.0    |
| MYLK2                  | 97.0   | 74.0   | 100.0   | 87.0    | 100.0   |
| MYLK4                  | 77.0   | 75.0   | 100.0   | 96.0    | 95.0    |
| MYO3A                  | 86.0   | 68.0   | 100.0   | 94.0    | 64.0    |
| MYO3B                  | 100.0  | 94.0   | 100.0   | 80.0    | 83.0    |
| NDR1                   | 71.0   | 83.0   | 100.0   | 26.0    | 54.0    |
| NDR2                   | 93.0   | 80.0   | 100.0   | 44.0    | 62.0    |

| KINOMEScan Gene Symbol | PQR309 | BKM120 | GDC0941 | GDC0980 | PKI-587 |
|------------------------|--------|--------|---------|---------|---------|
|                        | %      | %      | %       | %       | %       |
| NEK1                   | 76.0   | 94.0   | 100.0   | 85.0    | 62.0    |
| NEK10                  | 100.0  | 100.0  |         | 5.0     | 61.0    |
| NEK11                  | 100.0  | 82.0   |         | 50.0    | 82.0    |
| NEK2                   | 100.0  | 95.0   | 100.0   | 24.0    | 100.0   |
| NEK3                   | 100.0  | 65.0   |         | 100.0   | 100.0   |
| NEK4                   | 100.0  | 100.0  |         | 9.2     | 100.0   |
| NEK5                   | 100.0  | 97.0   | 100.0   | 100.0   | 100.0   |
| NEK6                   | 100.0  | 73.0   | 100.0   | 84.0    | 95.0    |
| NEK7                   | 100.0  | 94.0   | 100.0   | 87.0    | 100.0   |
| NEK9                   | 100.0  | 91.0   | 100.0   | 90.0    | 90.0    |
| NIK                    | 100.0  | 100.0  |         | 73.0    | 99.0    |
| NIM1                   | 92.0   | 98.0   | 100.0   | 100.0   | 98.0    |
| NLK                    | 99.0   | 67.0   | 100.0   | 75.0    | 68.0    |
| OSR1                   | 100.0  | 98.0   | 100.0   | 100.0   | 100.0   |
| p38-alpha              | 98.0   | 92.0   | 100.0   | 92.0    | 98.0    |
| p38-beta               | 95.0   | 86.0   | 100.0   | 79.0    | 92.0    |
| p38-delta              | 55.0   | 80.0   | 100.0   | 72.0    | 73.0    |
| p38-gamma              | 74.0   | 43.0   | 100.0   | 83.0    | 100.0   |
| PAK1                   | 94.0   | 86.0   | 100.0   | 53.0    | 93.0    |
| PAK2                   | 88.0   | 86.0   | 100.0   | 65.0    | 100.0   |
| PAK3                   | 86.0   | 98.0   | 100.0   | 51.0    | 100.0   |
| PAK4                   | 93.0   | 88.0   | 100.0   | 3.9     | 100.0   |
| PAK6                   | 83.0   | 95.0   | 100.0   | 47.0    | 92.0    |
| PAK7                   | 86.0   | 91.0   | 100.0   | 0.7     | 87.0    |
| PCK1                   | 100.0  | 100.0  | 100.0   | 100.0   | 100.0   |
| PCK2                   | 98.0   | 64.0   | 100.0   | 95.0    | 76.0    |
| PCK3                   | 100.0  | 100.0  | 100.0   | 98.0    | 100.0   |
| PDGFRA                 | 85.0   | 76.0   | 0.0     | 73.0    | 100.0   |
| PDGFRB                 | 97.0   | 79.0   | 100.0   | 8.9     | 75.0    |
| PDPK1                  | 53.0   | 65.0   | 100.0   | 96.0    | 80.0    |
| PFCDPK1(P.falciparum)  | 100.0  | 100.0  |         | 67.0    | 84.0    |
| PFPK5(P.falciparum)    | 78.0   | 100.0  |         | 99.0    | 100.0   |
| PFTAIRE2               | 100.0  | 100.0  | 100.0   | 86.0    | 93.0    |
| PFTK1                  | 93.0   | 91.0   | 100.0   | 96.0    | 100.0   |
| PHKG1                  | 91.0   | 84.0   | 100.0   | 82.0    | 98.0    |
| PHKG2                  | 89.0   | 75.0   | 100.0   | 87.0    | 67.0    |
| PIK3C2B                | 41.0   | 64.0   | 22.0    | 31.0    | 0.0     |
| PIK3C2G                | 7.0    | 27.0   | 27.0    | 12.0    | 0.2     |
| PIK3CA                 | 0.1    | 0.0    | 0.2     | 0.0     | 0.0     |
| PIK3CA(C420R)          | 0.0    | 0.0    | 0.4     | 0.0     | 0.2     |

| KINOMEScan Gene Symbol | PQR309 | BKM120 | GDC0941 | GDC0980 | PKI-587 |
|------------------------|--------|--------|---------|---------|---------|
|                        | %      | %      | %       | %       | %       |
| PIK3CA(E542K)          | 0.2    | 0.0    | 0.5     | 0.1     | 0.0     |
| PIK3CA(E545A)          | 0.1    | 0.0    | 0.4     | 0.0     | 0.2     |
| PIK3CA(E545K)          | 0.2    | 0.0    | 0.3     | 0.1     | 0.0     |
| PIK3CA(H1047L)         | 14.0   | 0.6    | 9.8     | 2.0     | 2.3     |
| PIK3CA(H1047Y)         | 1.4    | 0.8    | 14.0    | 0.4     | 1.8     |
| PIK3CA(I800L)          | 0.4    | 0.0    |         | 0.1     | 0.8     |
| PIK3CA(M1043I)         | 13.0   | 2.4    | 19.0    | 0.7     | 3.5     |
| PIK3CA(Q546K)          | 0.5    | 0.1    | 0.4     | 0.1     | 0.2     |
| PIK3CB                 | 2.6    | 0.7    | 0.1     | 0.3     | 0.3     |
| PIK3CD                 | 2.6    | 2.1    | 5.2     | 0.0     | 4.8     |
| PIK3CG                 | 1.0    | 2.2    | 5.3     | 0.0     | 0.1     |
| PIK4CB                 | 95.0   | 100.0  | 100.0   | 100.0   | 95.0    |
| PIM1                   | 85.0   | 80.0   | 100.0   | 82.0    | 100.0   |
| PIM2                   | 86.0   | 75.0   | 100.0   | 87.0    | 66.0    |
| PIM3                   | 78.0   | 86.0   | 100.0   | 85.0    | 100.0   |
| PIP5K1A                | 82.0   | 53.0   | 100.0   | 8.9     | 27.0    |
| PIP5K1C                | 100.0  | 100.0  |         | 27.0    | 80.0    |
| PIP5K2B                | 94.0   | 96.0   | 100.0   | 84.0    | 99.0    |
| PIP5K2C                | 96.0   | 100.0  |         | 96.0    | 83.0    |
| PKAC-alpha             | 67.0   | 83.0   | 100.0   | 70.0    | 84.0    |
| PKAC-beta              | 83.0   | 82.0   | 100.0   | 72.0    | 94.0    |
| PKMYT1                 | 66.0   | 90.0   | 100.0   | 98.0    | 87.0    |
| PKN1                   | 73.0   | 65.0   | 100.0   | 71.0    | 93.0    |
| PKN2                   | 100.0  | 83.0   | 100.0   | 93.0    | 100.0   |
| PKNB(M.tuberculosis)   | 100.0  | 95.0   |         | 100.0   | 66.0    |
| PLK1                   | 49.0   | 100.0  | 100.0   | 100.0   | 95.0    |
| PLK2                   | 65.0   | 64.0   | 100.0   | 67.0    | 89.0    |
| PLK3                   | 96.0   | 79.0   | 100.0   | 69.0    | 97.0    |
| PLK4                   | 81.0   | 72.0   | 100.0   | 57.0    | 100.0   |
| PRKCD                  | 100.0  | 86.0   | 100.0   | 62.0    | 76.0    |
| PRKCE                  | 42.0   | 95.0   | 100.0   | 26.0    | 73.0    |
| PRKCH                  | 100.0  | 100.0  | 100.0   | 45.0    | 86.0    |
| PRKCI                  | 92.0   | 85.0   |         | 100.0   | 100.0   |
| PRKCQ                  | 100.0  | 99.0   | 100.0   | 63.0    | 97.0    |
| PRKD1                  | 100.0  | 90.0   | 100.0   | 100.0   | 100.0   |
| PRKD2                  | 90.0   | 54.0   | 100.0   | 100.0   | 89.0    |
| PRKD3                  | 85.0   | 70.0   | 100.0   | 98.0    | 84.0    |
| PRKG1                  | 100.0  | 68.0   | 100.0   | 85.0    | 68.0    |
| PRKG2                  | 92.0   | 90.0   | 100.0   | 91.0    | 89.0    |
| PRKR                   | 72.0   | 69.0   | 100.0   | 20.0    | 98.0    |

| KINOMEScan Gene Symbol        | PQR309 | BKM120 | GDC0941 | GDC0980 | PKI-587 |
|-------------------------------|--------|--------|---------|---------|---------|
|                               | %      | %      | %       | %       | %       |
| PRKX                          | 75.0   | 99.0   | 100.0   | 59.0    | 73.0    |
| PRP4                          | 79.0   | 100.0  | 100.0   | 75.0    | 84.0    |
| PYK2                          | 100.0  | 95.0   | 100.0   | 58.0    | 100.0   |
| QSK                           | 84.0   | 89.0   | 100.0   | 94.0    | 100.0   |
| RAF1                          | 92.0   | 56.0   | 100.0   | 100.0   | 100.0   |
| RET                           | 80.0   | 72.0   | 100.0   | 68.0    | 76.0    |
| RET(M918T)                    | 84.0   | 80.0   | 100.0   | 62.0    | 99.0    |
| RET(V804L)                    | 86.0   | 83.0   | 100.0   | 63.0    | 92.0    |
| RET(V804M)                    | 86.0   | 95.0   | 100.0   | 57.0    | 87.0    |
| RIOK1                         | 97.0   | 94.0   | 100.0   | 24.0    | 63.0    |
| RIOK2                         | 90.0   | 85.0   | 100.0   | 2.1     | 67.0    |
| RIOK3                         | 84.0   | 92.0   | 100.0   | 79.0    | 61.0    |
| RIPK1                         | 84.0   | 72.0   | 100.0   | 100.0   | 100.0   |
| RIPK2                         | 100.0  | 97.0   | 100.0   | 76.0    | 72.0    |
| RIPK4                         | 100.0  | 100.0  | 100.0   | 99.0    | 53.0    |
| RIPK5                         | 98.0   | 79.0   |         | 53.0    | 78.0    |
| ROCK1                         | 100.0  | 89.0   | 100.0   | 76.0    | 65.0    |
| ROCK2                         | 100.0  | 94.0   | 100.0   | 75.0    | 58.0    |
| ROS1                          | 65.0   | 56.0   | 100.0   | 26.0    | 96.0    |
| RPS6KA4(Kin.Dom.1-N-terminal) | 86.0   | 93.0   | 100.0   | 89.0    | 96.0    |
| RPS6KA4(Kin.Dom.2-C-terminal) | 88.0   | 93.0   | 100.0   | 92.0    | 91.0    |
| RPS6KA5(Kin.Dom.1-N-terminal) | 92.0   | 72.0   | 100.0   | 91.0    | 93.0    |
| RPS6KA5(Kin.Dom.2-C-terminal) | 95.0   | 67.0   | 100.0   | 83.0    | 91.0    |
| RSK1(Kin.Dom.1-N-terminal)    | 74.0   | 69.0   | 100.0   | 25.0    | 100.0   |
| RSK1(Kin.Dom.2-C-terminal)    | 86.0   | 86.0   | 100.0   | 92.0    | 91.0    |
| RSK2(Kin.Dom.1-N-terminal)    | 96.0   | 84.0   | 100.0   | 14.0    | 84.0    |
| RSK2(Kin.Dom.2-C-terminal)    | 96.0   | 100.0  | 100.0   | 100.0   | 100.0   |
| RSK3(Kin.Dom.1-N-terminal)    | 100.0  | 100.0  | 100.0   | 51.0    | 100.0   |
| RSK3(Kin.Dom.2-C-terminal)    | 100.0  | 70.0   |         | 88.0    | 95.0    |
| RSK4(Kin.Dom.1-N-terminal)    | 100.0  | 65.0   | 100.0   | 66.0    | 77.0    |
| RSK4(Kin.Dom.2-C-terminal)    | 100.0  | 71.0   | 100.0   | 99.0    | 99.0    |
| S6K1                          | 100.0  | 86.0   |         | 73.0    | 91.0    |
| SBK1                          | 100.0  | 68.0   | 100.0   | 75.0    | 89.0    |
| SGK                           | 93.0   | 94.0   |         | 100.0   | 100.0   |
| SgK110                        | 76.0   | 82.0   | 100.0   | 57.0    | 100.0   |
| SGK2                          | 96.0   | 99.0   |         | 100.0   | 100.0   |
| SGK3                          | 89.0   | 100.0  |         | 69.0    | 85.0    |
| SIK                           | 91.0   | 72.0   | 100.0   | 49.0    | 94.0    |
| SIK2                          | 97.0   | 76.0   | 100.0   | 98.0    | 70.0    |
| SLK                           | 96.0   | 97.0   | 100.0   | 14.0    | 86.0    |

| KINOMEScan Gene Symbol       | PQR309 | BKM120 | GDC0941 | GDC0980 | PKI-587 |
|------------------------------|--------|--------|---------|---------|---------|
|                              | %      | %      | %       | %       | %       |
| SNARK                        | 100.0  | 100.0  | 100.0   | 52.0    | 97.0    |
| SNRK                         | 100.0  | 100.0  |         | 89.0    | 85.0    |
| SRC                          | 77.0   | 62.0   | 100.0   | 1.6     | 100.0   |
| SRMS                         | 94.0   | 85.0   | 100.0   | 27.0    | 97.0    |
| SRPK1                        | 78.0   | 75.0   | 100.0   | 66.0    | 93.0    |
| SRPK2                        | 58.0   | 100.0  | 100.0   | 80.0    | 58.0    |
| SRPK3                        | 77.0   | 68.0   | 100.0   | 64.0    | 64.0    |
| STK16                        | 78.0   | 70.0   | 100.0   | 22.0    | 73.0    |
| STK33                        | 66.0   | 73.0   | 100.0   | 61.0    | 93.0    |
| STK35                        | 85.0   | 81.0   | 100.0   | 12.0    | 87.0    |
| STK36                        | 86.0   | 98.0   | 100.0   | 92.0    | 84.0    |
| STK39                        | 100.0  | 100.0  | 100.0   | 71.0    | 100.0   |
| SYK                          | 100.0  | 93.0   | 100.0   | 1.8     | 71.0    |
| TAK1                         | 100.0  | 100.0  | 100.0   | 35.0    | 91.0    |
| TAOK1                        | 86.0   | 79.0   | 100.0   | 100.0   | 2.0     |
| TAOK2                        | 100.0  | 75.0   | 100.0   | 75.0    | 0.6     |
| TAOK3                        | 87.0   | 100.0  | 100.0   | 100.0   | 12.0    |
| TBK1                         | 76.0   | 61.0   | 100.0   | 71.0    | 90.0    |
| TEC                          | 80.0   | 100.0  | 100.0   | 8.4     | 67.0    |
| TESK1                        | 83.0   | 94.0   | 100.0   | 86.0    | 87.0    |
| TGFBR1                       | 100.0  | 93.0   | 100.0   | 100.0   | 89.0    |
| TGFBR2                       | 90.0   | 82.0   | 100.0   | 89.0    | 100.0   |
| TIE1                         | 100.0  | 86.0   | 100.0   | 80.0    | 64.0    |
| TIE2                         | 100.0  | 83.0   | 100.0   | 86.0    | 100.0   |
| TLK1                         | 93.0   | 86.0   | 100.0   | 97.0    | 94.0    |
| TLK2                         | 74.0   | 89.0   | 100.0   | 88.0    | 88.0    |
| TNIK                         | 75.0   | 100.0  | 100.0   | 27.0    | 73.0    |
| TNK1                         | 90.0   | 56.0   | 100.0   | 92.0    | 100.0   |
| TNK2                         | 75.0   | 60.0   | 100.0   | 81.0    | 87.0    |
| TNNI3K                       | 100.0  | 100.0  | 100.0   | 62.0    | 72.0    |
| TRKA                         | 88.0   | 79.0   | 100.0   | 32.0    | 88.0    |
| TRKB                         | 84.0   | 80.0   | 100.0   | 30.0    | 100.0   |
| TRKC                         | 92.0   | 92.0   | 100.0   | 51.0    | 96.0    |
| TRPM6                        | 85.0   | 89.0   |         | 32.0    | 66.0    |
| TSSK1B                       | 90.0   | 59.0   | 100.0   | 49.0    | 75.0    |
| TTK                          | 80.0   | 81.0   | 100.0   | 56.0    | 80.0    |
| TXK                          | 74.0   | 83.0   | 100.0   | 30.0    | 94.0    |
| TYK2(JH1domain-catalytic)    | 91.0   | 100.0  | 100.0   | 56.0    | 98.0    |
| TYK2(JH2domain-pseudokinase) | 100.0  | 100.0  | 100.0   | 0.1     | 92.0    |
| TYRO3                        | 68.0   | 100.0  | 100.0   | 56.0    | 95.0    |

| KINOMEScan Gene Symbol | <b>PQR309</b> | <b>BKM120</b> | <b>GDC0941</b> | <b>GDC0980</b> | <b>PKI-587</b> |
|------------------------|---------------|---------------|----------------|----------------|----------------|
|                        | %             | %             | %              | %              | %              |
| ULK1                   | 100.0         | 83.0          | 100.0          | 100.0          | 100.0          |
| ULK2                   | 91.0          | 100.0         | 100.0          | 100.0          | 100.0          |
| ULK3                   | 100.0         | 80.0          | 100.0          | 6.6            | 100.0          |
| VEGFR2                 | 100.0         | 100.0         | 100.0          | 30.0           | 100.0          |
| VRK2                   | 100.0         | 100.0         |                | 97.0           | 97.0           |
| WEE1                   | 84.0          | 79.0          | 100.0          | 100.0          | 100.0          |
| WEE2                   | 100.0         | 97.0          | 100.0          | 88.0           | 100.0          |
| WNK1                   | 100.0         | 100.0         |                | 46.0           | 38.0           |
| WNK3                   | 100.0         | 100.0         |                | 24.0           | 31.0           |
| YANK1                  | 100.0         | 100.0         |                | 100.0          | 100.0          |
| YANK2                  | 76.0          | 72.0          | 100.0          | 79.0           | 89.0           |
| YANK3                  | 79.0          | 84.0          | 100.0          | 64.0           | 94.0           |
| YES                    | 76.0          | 66.0          | 100.0          | 15.0           | 100.0          |
| YSK1                   | 69.0          | 86.0          | 100.0          | 95.0           | 70.0           |
| YSK4                   | 100.0         | 100.0         | 100.0          | 1.8            | 6.7            |
| ZAK                    | 83.0          | 87.0          | 100.0          | 96.0           | 99.0           |
| ZAP70                  | 87.0          | 93.0          | 100.0          | 35.0           | 100.0          |



**Table S3: Anti-proliferative action of compound PQR309 in four independent tumor cell line panels**

| Cell Lines      | Log GI <sub>50</sub> cell <sup>r</sup> - Log GI <sub>50</sub> ,<br>mean | GI <sub>50</sub><br>NCI60 | GI <sub>50</sub><br><sup>a</sup> NTRC | GI <sub>50</sub><br>Horizon | GI <sub>50</sub><br>CLOVIS |
|-----------------|-------------------------------------------------------------------------|---------------------------|---------------------------------------|-----------------------------|----------------------------|
| SHP-77          | 0.981                                                                   |                           | 6.701                                 |                             |                            |
| K-562           | 0.624                                                                   | 3.389                     | 2.510                                 |                             |                            |
| SW480           | 0.565                                                                   |                           | 2.574                                 |                             |                            |
| Ishikawa        | 0.435                                                                   |                           |                                       | 1.909                       |                            |
| MDA-MB-231      | 0.425                                                                   | 1.720                     |                                       |                             | 2.010                      |
| SNB-19          | 0.406                                                                   | 1.784                     |                                       |                             |                            |
| HEC-6           | 0.383                                                                   |                           |                                       | 1.690                       |                            |
| KM12            | 0.380                                                                   | 1.680                     |                                       |                             |                            |
| UWB1.289        | 0.340                                                                   |                           |                                       |                             | 1.532                      |
| CAL 27          | 0.337                                                                   |                           | 1.523                                 |                             |                            |
| U-87 MG         | 0.326                                                                   |                           | 1.483                                 |                             |                            |
| MDA-MB-436      | 0.314                                                                   |                           |                                       | 0.537                       | 2.348                      |
| SW-620          | 0.287                                                                   | 0.936                     | 1.774                                 |                             |                            |
| 786-0           | 0.284                                                                   | 0.620                     | 2.076                                 |                             |                            |
| SR              | 0.279                                                                   | 2.375                     | 0.289                                 |                             |                            |
| FaDu            | 0.278                                                                   |                           | 1.329                                 |                             |                            |
| DLD-1           | 0.277                                                                   |                           | 1.326                                 |                             |                            |
| CCRF-CEM        | 0.260                                                                   | 1.698                     | 0.849                                 |                             |                            |
| MDA-MB-468      | 0.246                                                                   | 0.148                     |                                       | 1.209                       | 2.348                      |
| HCC1395         | 0.244                                                                   |                           |                                       | 0.827                       | 1.628                      |
| UWB1.289+BRCA11 | 0.233                                                                   |                           |                                       |                             | 1.199                      |
| A-172           | 0.229                                                                   |                           | 1.188                                 |                             |                            |
| A375            | 0.216                                                                   |                           | 1.153                                 |                             |                            |
| 769-P           | 0.203                                                                   |                           | 1.119                                 |                             |                            |
| HCC-2998        | 0.197                                                                   | 1.102                     |                                       |                             |                            |
| C-33 A          | 0.192                                                                   |                           | 1.091                                 |                             |                            |
| MDA-MB-453      | 0.192                                                                   |                           |                                       | 1.089                       |                            |
| SF-268          | 0.175                                                                   | 1.047                     |                                       |                             |                            |
| MeWo            | 0.173                                                                   |                           | 1.043                                 |                             |                            |
| HCT-116         | 0.167                                                                   | 0.733                     | 1.324                                 |                             |                            |
| YD-8            | 0.157                                                                   |                           |                                       | 1.004                       |                            |
| J82             | 0.149                                                                   |                           | 0.988                                 |                             |                            |
| LS 174T         | 0.136                                                                   |                           | 0.957                                 |                             |                            |
| SK-N-AS         | 0.122                                                                   |                           | 0.927                                 |                             |                            |
| NCI-H82         | 0.114                                                                   |                           | 0.911                                 |                             |                            |
| OVCAR-8         | 0.107                                                                   | 0.685                     |                                       | 1.109                       |                            |
| BT-549          | 0.096                                                                   | 0.422                     | 1.324                                 |                             |                            |
| NCI-H23         | 0.089                                                                   | 0.859                     |                                       |                             |                            |
| RPMI-7951       | 0.044                                                                   |                           | 0.775                                 |                             |                            |
| PC-3            | 0.037                                                                   | 0.226                     |                                       |                             | 1.298                      |
| A-427           | 0.031                                                                   |                           | 0.753                                 |                             |                            |
| EFO-27          | 0.031                                                                   |                           |                                       | 0.751                       |                            |
| HL-60(TB)       | 0.029                                                                   | 0.748                     |                                       |                             |                            |
| DU-4475         | 0.017                                                                   |                           |                                       | 0.728                       |                            |
| Jurkat E6.1     | 0.012                                                                   |                           | 0.720                                 |                             |                            |
| SK-MEL-5        | 0.008                                                                   | 0.714                     |                                       |                             |                            |
| PA-1            | -0.001                                                                  |                           | 0.612                                 | 0.785                       |                            |
| NCI/ADR-RES     | -0.005                                                                  | 0.692                     |                                       |                             |                            |
| MDA-MB-157      | -0.007                                                                  |                           |                                       | 0.690                       |                            |
| SCC-9           | -0.012                                                                  |                           |                                       | 0.682                       |                            |
| HSC-4           | -0.013                                                                  |                           |                                       | 0.680                       |                            |
| KYM-1           | -0.019                                                                  |                           |                                       | 0.670                       |                            |
| SNU-1041        | -0.027                                                                  |                           |                                       | 0.658                       |                            |
| DU145           | -0.030                                                                  | 0.653                     |                                       |                             |                            |
| NCI-H322M       | -0.038                                                                  | 0.642                     |                                       |                             |                            |

| Cell Lines | Log GI <sub>50cell</sub> - Log GI <sub>50</sub><br>mean | GI <sub>50</sub><br>NCI60 | GI <sub>50</sub><br><sup>a</sup> NTRC | GI <sub>50</sub><br>Horizon | GI <sub>50</sub><br>CLOVIS |
|------------|---------------------------------------------------------|---------------------------|---------------------------------------|-----------------------------|----------------------------|
| RPMI-8226  | -0.075                                                  | 0.589                     |                                       |                             |                            |
| LOX IMVI   | -0.080                                                  | 0.582                     |                                       |                             |                            |
| NCI-H2452  | -0.084                                                  |                           |                                       | 0.577                       |                            |
| U251       | -0.110                                                  | 0.544                     |                                       |                             |                            |
| SJCRH30    | -0.114                                                  |                           | 0.539                                 |                             |                            |
| MG-63      | -0.116                                                  |                           | 0.536                                 |                             |                            |
| U-2 OS     | -0.116                                                  |                           | 0.536                                 |                             |                            |
| SF-539     | -0.119                                                  | 0.532                     |                                       |                             |                            |
| A549/ATCC  | -0.121                                                  | 0.437                     | 0.624                                 |                             |                            |
| HCT-15     | -0.123                                                  | 0.343                     | 0.713                                 |                             |                            |
| HuH-28     | -0.133                                                  |                           |                                       | 0.516                       |                            |
| BT-20      | -0.139                                                  |                           | 0.509                                 |                             |                            |
| OVCAR-4    | -0.155                                                  | 0.490                     |                                       |                             |                            |
| SN12C      | -0.170                                                  | 0.473                     |                                       |                             |                            |
| Caov-4     | -0.176                                                  |                           |                                       | 0.468                       |                            |
| M14        | -0.180                                                  | 0.463                     |                                       |                             |                            |
| SK-MEL-2   | -0.188                                                  | 0.454                     |                                       |                             |                            |
| CAKI.1     | -0.200                                                  | 0.442                     |                                       |                             |                            |
| MOLT-4     | -0.203                                                  | 0.484                     | 0.393                                 |                             |                            |
| MPP-89     | -0.205                                                  |                           |                                       | 0.437                       |                            |
| MCF7       | -0.214                                                  | 0.103                     |                                       |                             | 0.753                      |
| MDA-MB-435 | -0.215                                                  | 0.427                     |                                       |                             |                            |
| OC 316     | -0.219                                                  |                           |                                       | 0.423                       |                            |
| BICR 6     | -0.226                                                  |                           |                                       | 0.416                       |                            |
| NCI-H226   | -0.227                                                  | 0.415                     |                                       |                             |                            |
| BxPC-3     | -0.228                                                  |                           | 0.414                                 |                             |                            |
| Hs 578T    | -0.241                                                  | 0.198                     | 0.817                                 | 0.192                       |                            |
| YD-10B     | -0.251                                                  |                           |                                       | 0.393                       |                            |
| NCI-H460   | -0.256                                                  | 0.300                     | 0.477                                 |                             |                            |
| Caov-3     | -0.260                                                  |                           |                                       | 0.385                       |                            |
| BICR 18    | -0.263                                                  |                           |                                       | 0.382                       |                            |
| ACHN       | -0.265                                                  | 0.392                     | 0.369                                 |                             |                            |
| NCI-H522   | -0.268                                                  | 0.378                     |                                       |                             |                            |
| HOP-62     | -0.271                                                  | 0.375                     |                                       |                             |                            |
| MDA-MB-361 | -0.279                                                  |                           |                                       |                             | 0.369                      |
| BICR 16    | -0.287                                                  |                           |                                       | 0.362                       |                            |
| HEC-1-A    | -0.292                                                  |                           |                                       | 0.358                       |                            |
| BHY        | -0.304                                                  |                           |                                       | 0.348                       |                            |
| AGS        | -0.305                                                  |                           |                                       | 0.347                       |                            |
| LoVo       | -0.324                                                  |                           | 0.332                                 |                             |                            |
| YD-15      | -0.325                                                  |                           |                                       | 0.331                       |                            |
| OVCAR-3    | -0.327                                                  | 0.430                     | 0.229                                 |                             |                            |
| RL95-2     | -0.329                                                  |                           |                                       | 0.329                       |                            |
| SK-MEL-28  | -0.329                                                  | 0.328                     |                                       |                             |                            |
| JHUEM-1    | -0.332                                                  |                           |                                       | 0.326                       |                            |
| COLO 205   | -0.335                                                  | 0.324                     |                                       |                             |                            |
| AU-565     | -0.340                                                  |                           | 0.320                                 |                             |                            |
| SK-OV-3    | -0.350                                                  | 0.202                     |                                       | 0.424                       |                            |
| HT29       | -0.355                                                  | 0.309                     |                                       |                             |                            |
| A-2780     | -0.363                                                  |                           |                                       | 0.157                       | 0.451                      |
| A498       | -0.364                                                  | 0.076                     | 0.530                                 |                             |                            |
| AN3 CA     | -0.378                                                  |                           | 0.293                                 |                             |                            |
| OVCAR-5    | -0.387                                                  | 0.293                     |                                       | 0.281                       |                            |
| SF-295     | -0.387                                                  | 0.287                     |                                       |                             |                            |
| NUGC-3     | -0.411                                                  |                           |                                       | 0.272                       |                            |
| RXF.393    | -0.425                                                  | 0.263                     |                                       |                             |                            |
| NCI-H28    | -0.427                                                  |                           |                                       | 0.262                       |                            |
| NCI-SNU-5  | -0.442                                                  |                           |                                       | 0.253                       |                            |

| Cell Lines     | Log GI <sub>50</sub> cell- Log GI <sub>50</sub> ,<br>mean | GI <sub>50</sub><br>NCI60 | GI <sub>50</sub><br><sup>a</sup> NTRC | GI <sub>50</sub><br>Horizon | GI <sub>50</sub><br>CLOVIS |
|----------------|-----------------------------------------------------------|---------------------------|---------------------------------------|-----------------------------|----------------------------|
| TGBC11TKB      | -0.482                                                    |                           |                                       | 0.231                       |                            |
| UACC-62        | -0.484                                                    | 0.230                     |                                       |                             |                            |
| MSTO-211H      | -0.541                                                    |                           |                                       | 0.202                       |                            |
| UACC-257       | -0.555                                                    | 0.195                     |                                       |                             |                            |
| KLE            | -0.578                                                    |                           |                                       | 0.185                       |                            |
| SW48           | -0.602                                                    |                           | 0.175                                 |                             |                            |
| CAL-33         | -0.633                                                    |                           |                                       | 0.163                       |                            |
| T47D           | -0.645                                                    | 0.052                     |                                       | 0.265                       |                            |
| BICR 31        | -0.647                                                    |                           |                                       | 0.158                       |                            |
| MALME-3M       | -0.664                                                    | 0.152                     |                                       |                             |                            |
| TK-10          | -0.669                                                    | 0.150                     |                                       |                             |                            |
| IST-MES1       | -0.683                                                    |                           |                                       | 0.145                       |                            |
| UO.31          | -0.693                                                    | 0.142                     |                                       |                             |                            |
| HCC1187        | -0.710                                                    |                           |                                       | 0.137                       |                            |
| HCC2218        | -0.740                                                    |                           |                                       | 0.128                       |                            |
| SNB-75         | -0.763                                                    | 0.121                     |                                       |                             |                            |
| OVISE          | -0.794                                                    |                           |                                       | 0.113                       |                            |
| IGROV1         | -0.796                                                    | 0.112                     |                                       |                             |                            |
| A-204          | -0.837                                                    |                           | 0.102                                 |                             |                            |
| MDA-MB-175-VII | -0.905                                                    |                           |                                       | 0.087                       |                            |
| HOP-92         | -1.146                                                    | 0.050                     |                                       |                             |                            |
| RERF-GC-1B     | -1.327                                                    |                           |                                       | 0.033                       |                            |

<sup>a</sup>The dataset used here for GI<sub>50</sub> determination is represented as IC<sub>50</sub> calculations in Ref. [11](#).

**Table S4: In Vitro Pharmacology I – Ligand Binding Assays with PQR309 at 10  $\mu$ M**

| GPCRs, Ion channels, Nuclear Receptors and Transporters, [% of control] |       |                                                             |       |
|-------------------------------------------------------------------------|-------|-------------------------------------------------------------|-------|
| A1*, aRL                                                                | 94.3  | M2*, ant-RL                                                 | 106.1 |
| A2A*, aRL                                                               | 100.3 | M3*, ant-RL                                                 | 100.1 |
| A2B*, ant-RL                                                            | 98.9  | M4*, ant-RL                                                 | 111.5 |
| A3*, aRL                                                                | 69.1  | NK1*, aRL                                                   | 93.1  |
| alpha 1A*, ant-RL                                                       | 99.1  | NK2*, aRL                                                   | 104.6 |
| alpha 1B*, ant-RL                                                       | 109.2 | Y1*, aRL                                                    | 113.2 |
| alpha 2A*, ant-RL                                                       | 102.2 | N neuronal alpha4, beta2*, aRL                              | 99.4  |
| alpha 2B*, ant-RL                                                       | 124.1 | N muscle-type*, ant-RL                                      | 85.5  |
| alpha 2C*, ant-RL                                                       | 112.4 | delta2 (DOP)*, aRL                                          | 100.1 |
| beta1*, aRL                                                             | 104.1 | kappa (KOP), aRL                                            | 120.7 |
| beta2*, aRL                                                             | 103.9 | mu (MOP)*, aRL                                              | 96.8  |
| beta3*, ant-RL                                                          | 103.3 | NOP (ORL1)*, aRL                                            | 98.7  |
| AT1*, ant-RL                                                            | 103.7 | PPARgamma *, aRL                                            | 96.3  |
| AT2*, aRL                                                               | 101.5 | PAF*, aRL                                                   | 92.9  |
| APJ (apelin)*, aRL                                                      | 103.2 | PCP, ant-RL                                                 | 100.0 |
| BZD (central), aRL                                                      | 132.0 | EP2*, aRL                                                   | 88.8  |
| BB3*, aRL                                                               | 103.4 | FP*, aRL                                                    | 109.5 |
| B2*, aRL                                                                | 100.6 | IP (PGI2)*, aRL                                             | 105.9 |
| CB1*, aRL                                                               | 77.7  | LXRbeta *, aRL                                              | 103.5 |
| CB2*, aRL                                                               | 107.8 | 5-HT1A*, aRL                                                | 93.1  |
| CCK1 (CCKA)*, aRL                                                       | 103.0 | 5-HT1B, ant-RL                                              | 113.5 |
| CCK2 (CCKB)*, aRL                                                       | 118.9 | 5-HT1D, aRL                                                 | 85.5  |
| CRF1*, aRL                                                              | 94.6  | 5-HT2A*, aRL                                                | 96.6  |
| D1*, ant-RL                                                             | 96.1  | 5-HT2B*, aRL                                                | 111.8 |
| D2S*, aRL                                                               | 106.6 | 5-HT2C*, aRL                                                | 106.0 |
| D3*, ant-RL                                                             | 94.8  | 5-HT3*, ant-RL                                              | 107.0 |
| ETA*, aRL                                                               | 103.2 | 5-HT4e*, ant-RL                                             | 103.3 |
| ETB*, aRL                                                               | 91.9  | 5-HT6*, aRL                                                 | 104.7 |
| GABAA1* (alpha1, beta2, gamma2), aRL                                    | 108.8 | 5-HT7*, aRL                                                 | 93.0  |
| GABAB(1b)*, ant-RL                                                      | 108.0 | sigma (non-selective)*, aRL                                 | 100.2 |
| glucagon*, aRL                                                          | 88.0  | sst1*, aRL                                                  | 86.7  |
| AMPA, aRL                                                               | 134.5 | sst4*, aRL                                                  | 88.5  |
| kainate, aRL                                                            | 75.3  | GR*, aRL                                                    | 87.7  |
| NMDA, ant-RL                                                            | 94.8  | ERalpha * (agonist fluoligand)                              | 103.2 |
| glycine (strychnine-insensitive), ant-RL                                | 134.2 | AR*, aRL                                                    | 97.3  |
| TNF-alpha*, aRL                                                         | 97.0  | TR (TH), aRL                                                | 121.1 |
| CCR2*, aRL                                                              | 85.3  | UT*, aRL                                                    | 94.3  |
| H1*, ant-RL                                                             | 105.4 | VPAC1 (VIP1)*, aRL                                          | 101.1 |
| H2*, ant-RL                                                             | 99.9  | V1a*, aRL                                                   | 95.6  |
| H3*, aRL                                                                | 107.3 | V2*, aRL                                                    | 92.0  |
| H4*, aRL                                                                | 99.4  | Ca2+ channel (L, dihydropyridine site), ant-RL              | 162.1 |
| BLT1 (LTB4)*, aRL                                                       | 95.0  | Ca2+ channel (L, diltiazem site) (benzothiazepines), ant-RL | 101.6 |
| CysLT1 (LTD4)*, aRL                                                     | 91.9  | Ca2+ channel (L, verapamil site) (phenylalkylamine), ant-RL | 96.8  |
| MCH1*, aRL                                                              | 92.9  | Ca2+ channel (N), ant-RL                                    | 109.6 |
| MC1, aRL                                                                | 109.2 | SKCa channel, ant-RL                                        | 107.5 |
| MC3*, aRL                                                               | 90.2  | Na+ channel (site 2), ant-RL                                | 103.1 |
| MC4*, aRL                                                               | 109.4 | Cl- channel (GABA-gated), ant-RL                            | 92.7  |
| MT1 (ML1A)*, aRL                                                        | 59.8  | norepinephrine transporter*, ant-RL                         | 91.5  |
| MT3 (ML2), aRL                                                          | 72.1  | dopamine transporter*, ant-RL                               | 74.1  |
| MAO-A, ant-RL                                                           | 109.2 | GABA transporter, ant-RL                                    | 101.9 |
| motilin*, aRL                                                           | 98.8  | choline transporter (CHT1)*, ant-RL                         | 106.7 |
| M1*, ant-RL                                                             | 122.9 | 5-HT transporter*, ant-RL                                   | 96.7  |

\*human target; aRL: agonist radioligand; ant-RL: antagonist radioligand; For further information see Cerep.fr P22-p.

**Table S5: In Vitro Pharmacology II – Enzyme Assays with PQR309 at 10  $\mu$ M**

| Enzymes tested                                                     | % of control |
|--------------------------------------------------------------------|--------------|
| COX1*                                                              | 94.0         |
| COX2*                                                              | 116.7        |
| inducible NOS                                                      | 121.5        |
| PDE2A1*                                                            | 87.3         |
| PDE3B*                                                             | 88.1         |
| PDE4D2*                                                            | 90.6         |
| PDE5* (non-selective)                                              | 85.8         |
| PDE6 (non-selective)                                               | 87.4         |
| ACE*                                                               | 90.4         |
| ACE-2*                                                             | 95.2         |
| BACE-1* (beta -secretase)                                          | 97.0         |
| caspase-3*                                                         | 95.9         |
| HIV-1 protease*                                                    | 98.5         |
| neutral endopeptidase*                                             | 100.3        |
| MMP-1*                                                             | 95.2         |
| MMP-2*                                                             | 98.2         |
| MMP-9*                                                             | 115.2        |
| Abl kinase*                                                        | 98.5         |
| CaMK2alpha *                                                       | 99.9         |
| CDK2* (cycA)                                                       | 81.9         |
| ERK2* (P42mapk)                                                    | 99.1         |
| FLT-1 kinase* (VEGFR1)                                             | 92.0         |
| Fyn kinase*                                                        | 95.6         |
| IRK* (InsR)                                                        | 113.6        |
| Lyn A kinase*                                                      | 98.3         |
| p38alpha kinase*                                                   | 99.5         |
| ZAP70 kinase*                                                      | 87.8         |
| acetylcholinesterase*                                              | 84.7         |
| COMT (catechol- O-methyl transferase)                              | 92.9         |
| xanthine oxidase/superoxide O <sub>2</sub> <sup>-</sup> scavenging | 101.5        |
| ATPase (Na <sup>+</sup> /K <sup>+</sup> )                          | 94.8         |
| guanylyl cyclase* (activator effect; controls effect = 100)        | 0.95         |

\*human target protein

**Table S6: Safety Profile of Compound 1**

| Studies                                                                                                                                                            | Results                                                                                                                                                                                                                                                                                                                                                                                                                                                                                                                                        |
|--------------------------------------------------------------------------------------------------------------------------------------------------------------------|------------------------------------------------------------------------------------------------------------------------------------------------------------------------------------------------------------------------------------------------------------------------------------------------------------------------------------------------------------------------------------------------------------------------------------------------------------------------------------------------------------------------------------------------|
| <b>Toxicity tests in vivo</b>                                                                                                                                      |                                                                                                                                                                                                                                                                                                                                                                                                                                                                                                                                                |
| 28-day oral toxicity studies (GLP) in Wistar rats and Beagle dogs with 4-week treatment-free recovery (based on 4-day dose-range finding and 28-day pilot studies) | Steep dose-response; body weight loss was dose-limiting. Otherwise mild toxicity (organ weight and/or histopathology) in the hemato-lymphoid system (mainly rats), reproductive system (rats and dogs), and the salivary glands (rats only). Reversible with exception of an atrophy of the sublingual salivary glands. Rats: Severely toxic dose > 8 (♂), > 4 (♀) mg/kg. No Observed Adverse Effect Level (NOAEL) < Low dose (♂ 2 and ♀ 1 mg/kg). Dogs: NOAEL = 4 mg/kg for both genders. Highest-Non-Severely-Toxic-Dose 8 (♂), 6 (♀) mg/kg. |
| Safety pharmacology testing (part of the 28-day toxicity studies below)                                                                                            | Neuropharmacology profiling and respiratory function in rats as well as cardiovascular function in male dogs: no relevant findings; (GLP)                                                                                                                                                                                                                                                                                                                                                                                                      |
| Dog telemetry, cardiovascular safety pharmacology                                                                                                                  | Single oral dose. No relevant findings; (GLP)                                                                                                                                                                                                                                                                                                                                                                                                                                                                                                  |
| <b>Toxicity tests in vitro</b>                                                                                                                                     |                                                                                                                                                                                                                                                                                                                                                                                                                                                                                                                                                |
| hERG patch clamp assays                                                                                                                                            | No inhibition of hERG tail current; (GLP)                                                                                                                                                                                                                                                                                                                                                                                                                                                                                                      |
| Phototoxicity test                                                                                                                                                 | No phototoxicity; (non-GLP)                                                                                                                                                                                                                                                                                                                                                                                                                                                                                                                    |
| Ames test                                                                                                                                                          | No mutagenicity; (non-GLP)                                                                                                                                                                                                                                                                                                                                                                                                                                                                                                                     |
| <b>PK and metabolism in vivo</b>                                                                                                                                   |                                                                                                                                                                                                                                                                                                                                                                                                                                                                                                                                                |
| Toxicokinetic investigations in 28 day oral toxicity studies (rats, dogs)                                                                                          | C <sub>max</sub> after 0.5 to 2 hrs; dose-proportional exposure with dose-normalized AUC <sub>24 hrs</sub> in rats: ~ 1000 (♂) to 2000 (-3500) (♀) hr·kg·ng/mL/mg, in dogs: ~ 300 – 800 hr·kg·ng/mL/mg; with exception of 2-fold accumulation in ♀ at 6 mg/kg. Terminal t <sub>1/2</sub> in rats: ♂ 3.3 – 5.1 hrs, ♀ 4.8 – 16.0 hrs and in dogs (♂ and ♀): 5.9 to 9.3 hrs                                                                                                                                                                      |
| Pharmacokinetic (PK) and bioavailability (BAV) in male dogs                                                                                                        | Single oral dose and i.v. dose: BAV 23%, t <sub>max</sub> ~ 1-2 hrs, t <sub>1/2</sub> ~ 8 hrs; non-GLP                                                                                                                                                                                                                                                                                                                                                                                                                                         |
| Single oral dose ADME study in rats                                                                                                                                | BAV 24-32%; t <sub>max</sub> 4 hrs, highly distributed; no binding to melanin; extensively metabolized: 5 major metabolites, mainly by hydrolysis and hydroxylation; rapidly excreted. Performed with radioactive PQR309; (GLP)                                                                                                                                                                                                                                                                                                                |
| <b>PK and metabolism in vitro</b>                                                                                                                                  |                                                                                                                                                                                                                                                                                                                                                                                                                                                                                                                                                |
| Metabolism in hepatocytes                                                                                                                                          | In rat (R), dog (D) and human (Hu): high metabolic stability, 25 unsuspected metabolites in small quantities; (GLP)                                                                                                                                                                                                                                                                                                                                                                                                                            |
| Blood/plasma distribution                                                                                                                                          | In male Wistar Han rat (R), Beagle dog (D) and human (Hu) plasma (GLP): up to 6050 ng/ml, 43.4% binding in R; 43.9% in D; and 32.5% in Hu; concentration independent.                                                                                                                                                                                                                                                                                                                                                                          |
| Plasma protein binding                                                                                                                                             | In male Wistar Han rat, Beagle dog and human plasma (GLP) 74.0-75.0% in R, 78.7-80.0% in D and 86.7-86.9% in Hu                                                                                                                                                                                                                                                                                                                                                                                                                                |
| Inhibition of CYP450 isoenzymes in human hepatocytes                                                                                                               | At > 30 μM some inhibition of CYP 2C19 and 3A4 and tendency for inhibition of CYP1A2, 2C8, 2C9. No inhibition of CYP2B6, 2D6. Effects occur at > 10x of expected human therapeutic plasma levels. Drug-drug interactions cannot be excluded.                                                                                                                                                                                                                                                                                                   |
| Induction of CYP450 isoenzymes in human hepatocytes                                                                                                                | mRNA levels: slight increase for CYP2B6 at 0.5 and 1 μM in donor 1 (not at 5 and 10 μM) and CYP3A4 at 10 μM in donor 2; Drug-drug interactions cannot be excluded; (GLP)                                                                                                                                                                                                                                                                                                                                                                       |

**Table S7. Solubility of PI3K inhibitors and reference compounds**

| Compounds*                      | Solubility [ $\mu$ M], Mean $\pm$ SD |                  | Range       |             |
|---------------------------------|--------------------------------------|------------------|-------------|-------------|
|                                 | pH 7.4                               | pH 4.0           | pH 7.4      | pH 4.0      |
| <b>at 200 <math>\mu</math>M</b> |                                      |                  |             |             |
| <b>PQR309</b>                   | 206.0 $\pm$ 8.0                      | 206.0 $\pm$ 0.1  | $\geq$ 200  | $\geq$ 200  |
| <b>2</b>                        | 63.0 $\pm$ 0.1                       | 76.0 $\pm$ 1.0   | <200        | <200        |
| <b>BKM120</b>                   | 99.0 $\pm$ 0.1                       | 182.0 $\pm$ 18.0 | <200        | $\leq$ 200  |
| <b>ZSTK474</b>                  | 3.0 $\pm$ 0.1                        | 4.0 $\pm$ 0.1    | $\lll$ <200 | $\lll$ <200 |
| <b>BEZ235</b>                   | 15.0 $\pm$ 0.1                       | 57.0 $\pm$ 10.0  | $\ll$ <200  | <200        |
| <b>Diclofenac</b>               | 195.0 $\pm$ 2.0                      | 10.0 $\pm$ 1.0   | $\geq$ 200  | $\lll$ <200 |
| <b>Ketoconazole</b>             | 135.0 $\pm$ 10.0                     | 197.0 $\pm$ 7.0  | <200        | $\leq$ 200  |
| <b>Phenytoin</b>                | 186.0 $\pm$ 17.0                     | 149.0 $\pm$ 5.0  | <200        | <200        |

\*Compounds were diluted in aqueous solutions (PBS for pH 7.4, citrate for pH 4.0, 1% DMSO) at 200  $\mu$ M, and soluble compounds were analyzed by LC/MS.

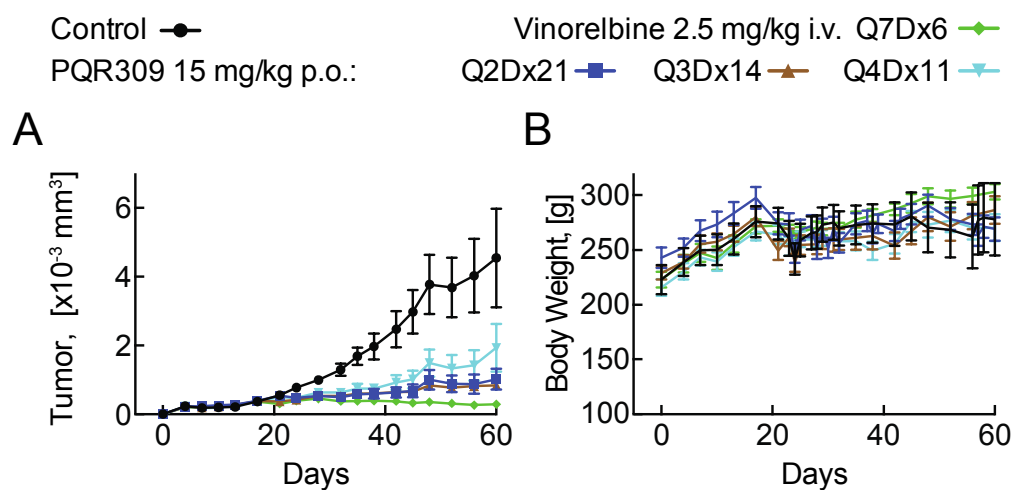

**Figure S2.** Compound PQR309 intermittent dosing efficacy model in PC3 xenografts in nude rats. **A)** Tumor volume: PQR309 was given every second day (Q2D), every third day (Q3D) or every fourth day (Q4D) p.o. at a dose of 15 mg/kg. Vinorelbine was given weekly (Q7D; 2.5 mg/kg i.v.), and control animals received vehicle only (Q2D). **B)** Body weight changes in nude rats during the treatment as mentioned in A). Data are depicted as mean  $\pm$  SEM (Control n=6, Vinorelbine n=6, compound PQR309 each dose n=8).



**<sup>1</sup>H NMR Spectra:**5-(4,6-Dimorpholino-1,3,5-triazin-2-yl)-4-(trifluoromethyl)pyrimidin-2-amine (**2**):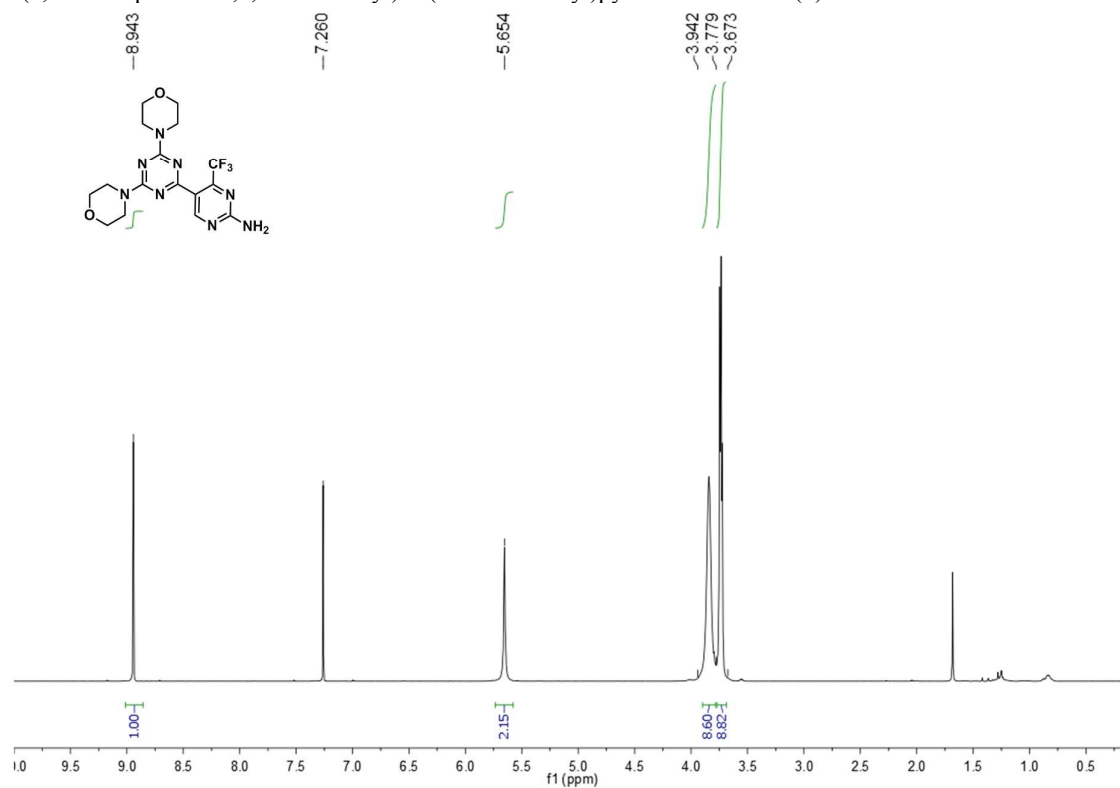4,4'-(6-Iodo-1,3,5-triazine-2,4-diyl)dimorpholine (**8**):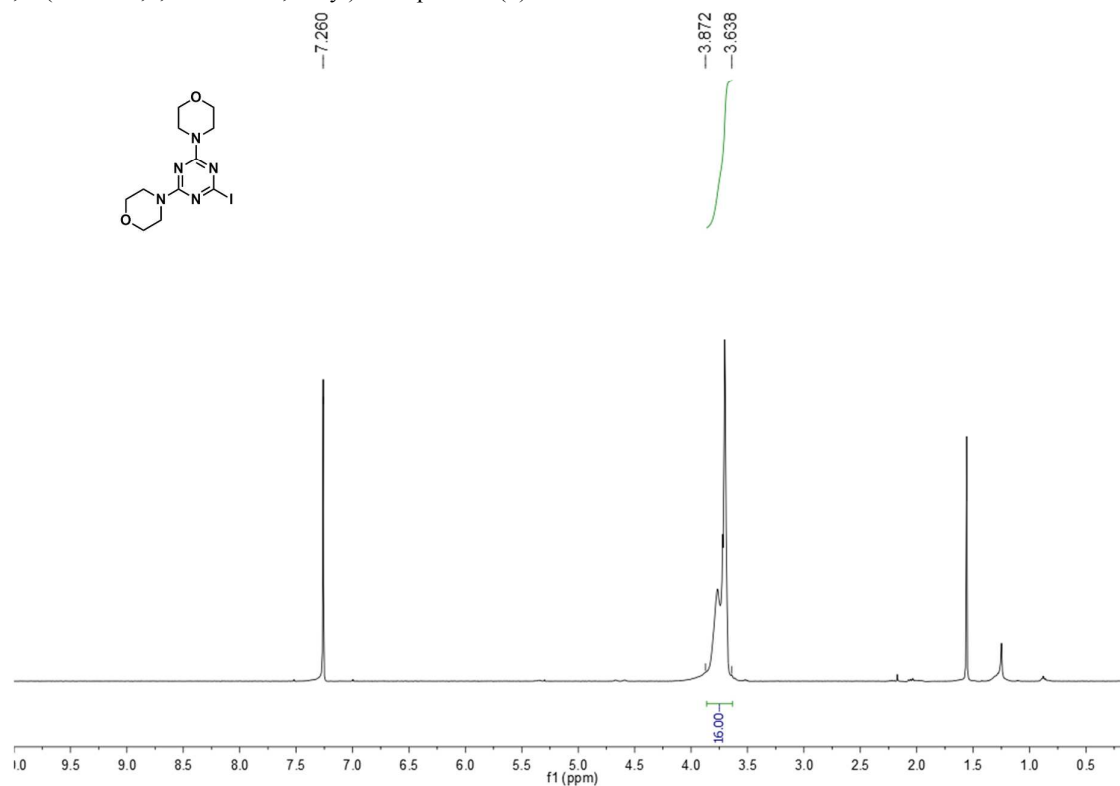

4-(4,6-Dimorpholino-1,3,5-triazin-2-yl)aniline (**9**):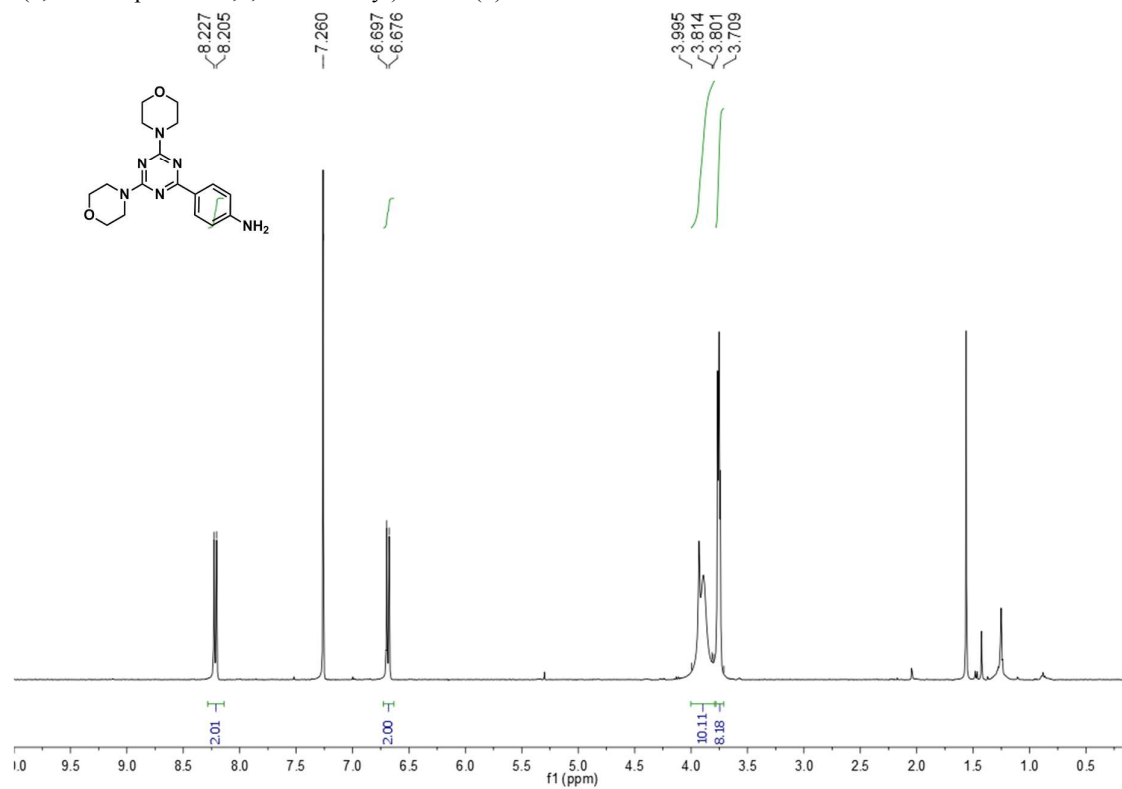5-(4,6-Dimorpholino-1,3,5-triazin-2-yl)pyridin-2-amine (**10**):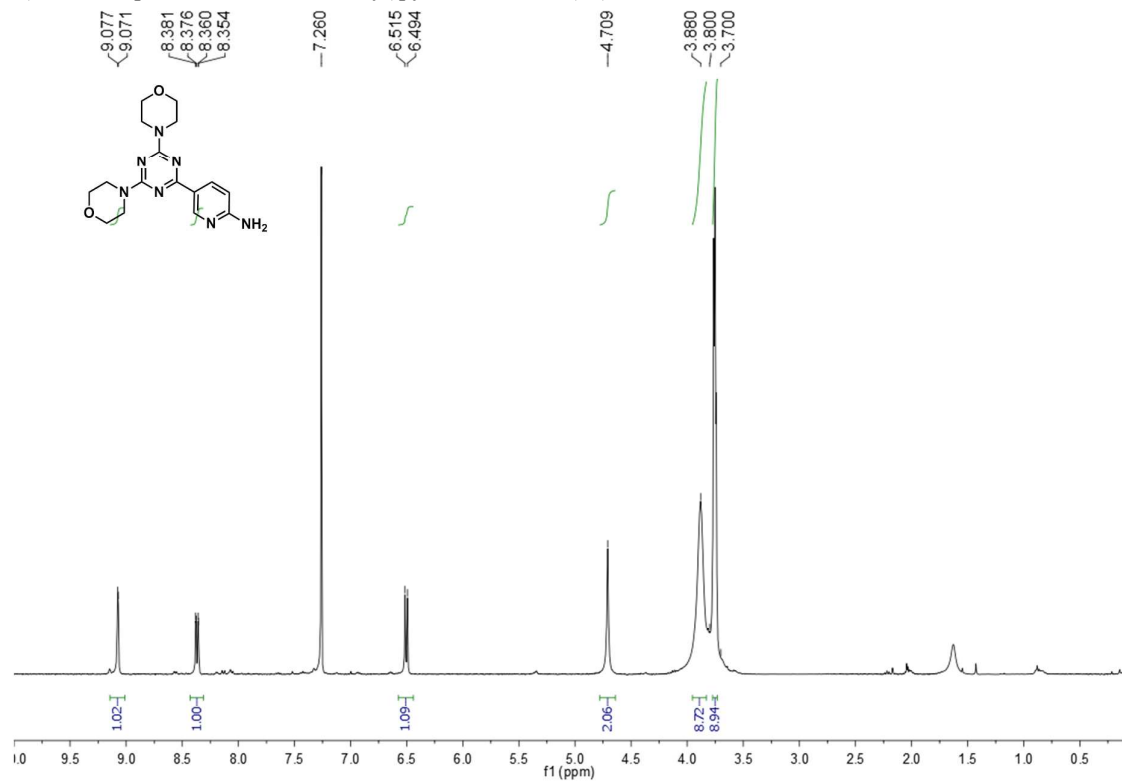

5-(4,6-Dimorpholino-1,3,5-triazin-2-yl)pyrimidin-2-amine (**11**):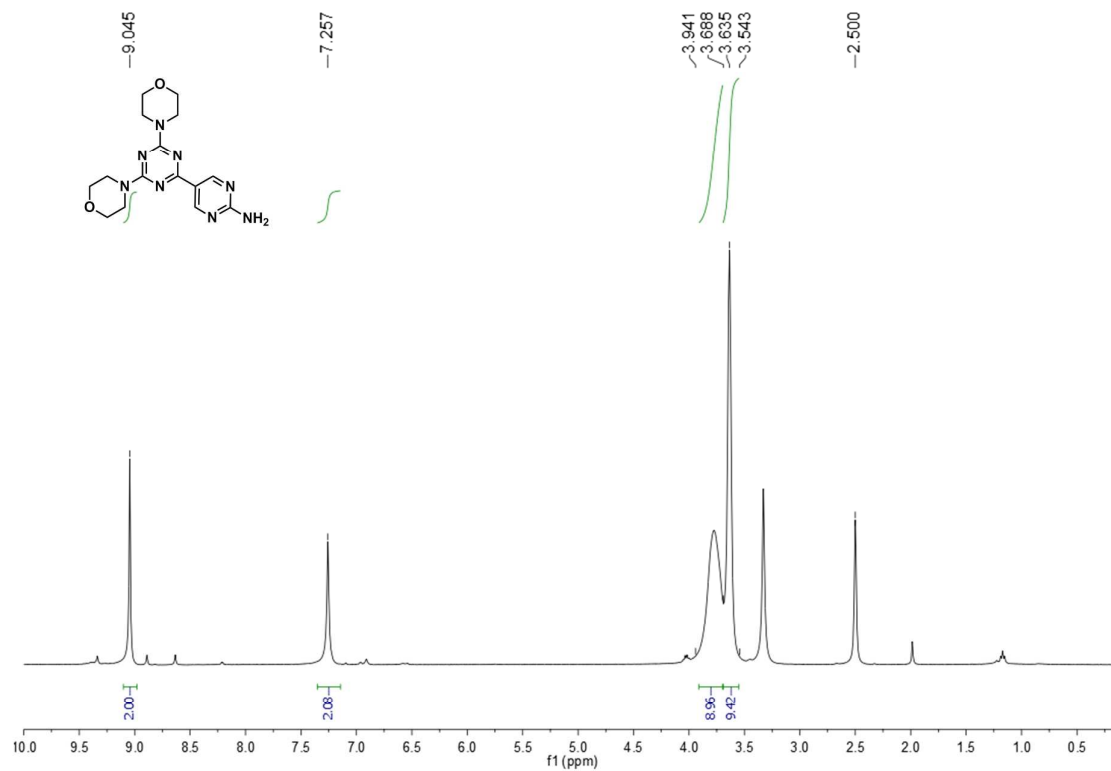5-(4,6-Dimorpholino-1,3,5-triazin-2-yl)pyrazin-2-amine (**12**):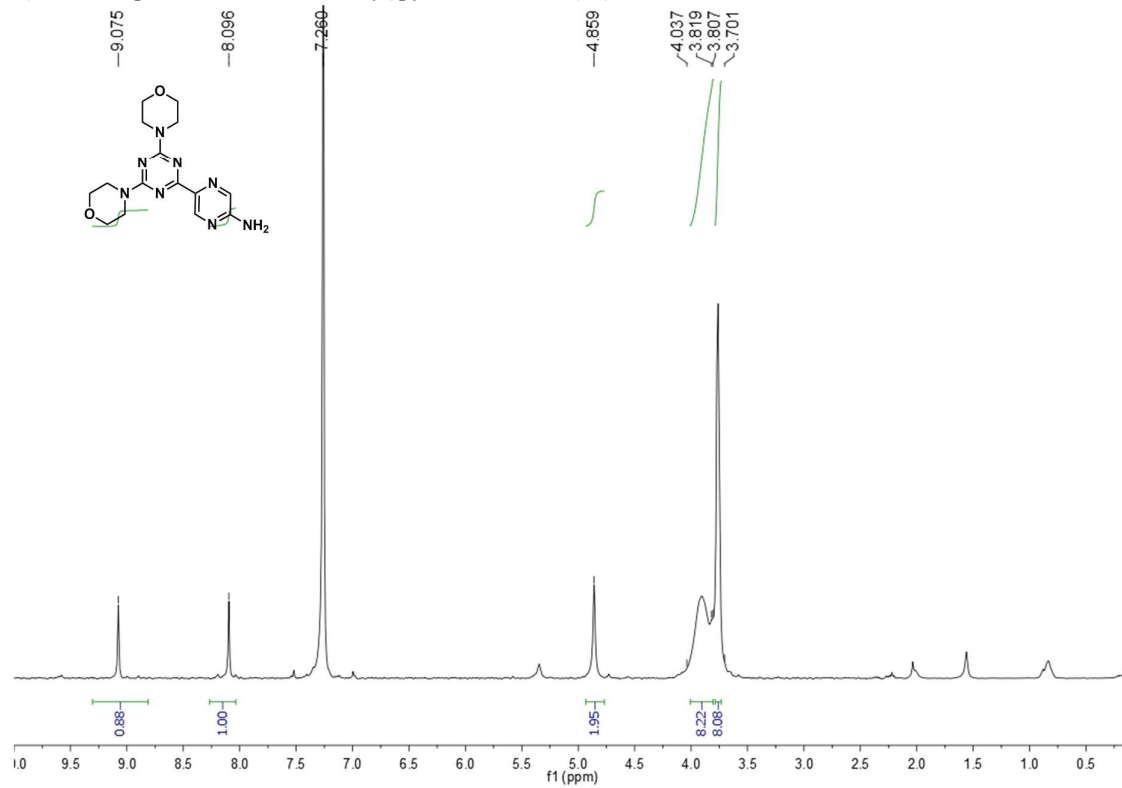

5-(4,6-Dimorpholino-1,3,5-triazin-2-yl)-4-methylpyridin-2-amine (**13**):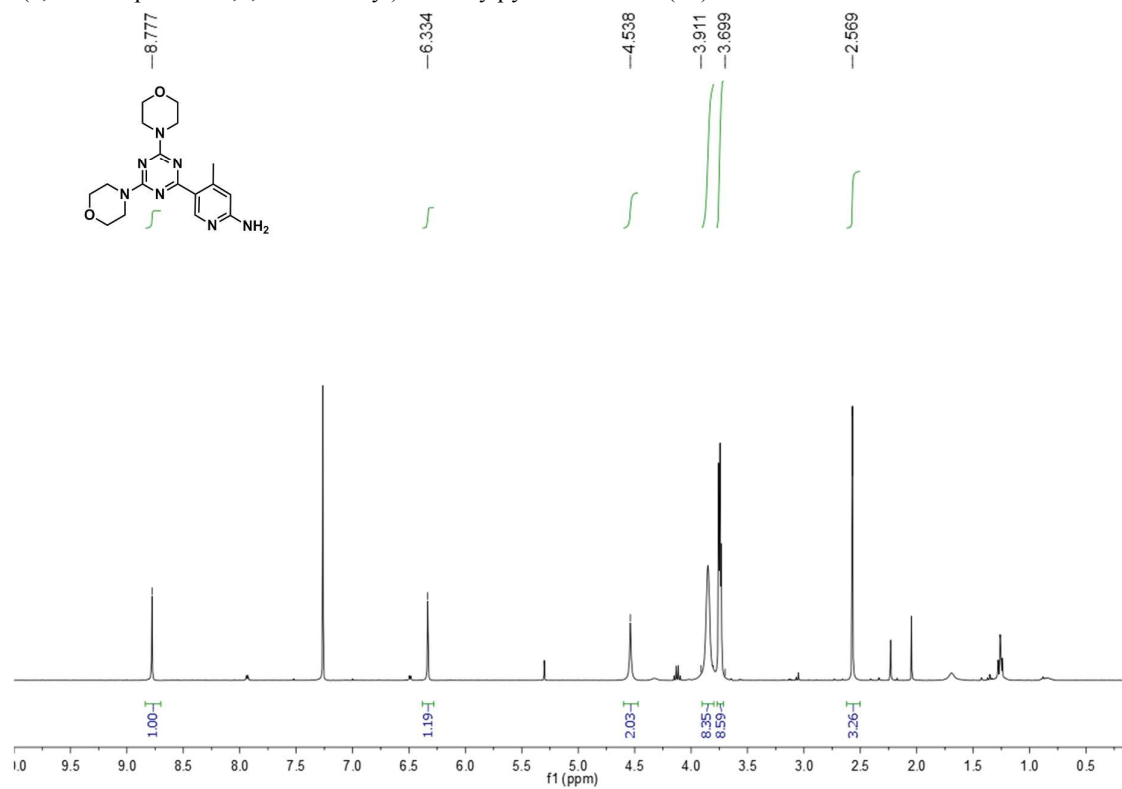5-(4,6-Dimorpholino-1,3,5-triazin-2-yl)-3-methylpyridin-2-amine (**14**):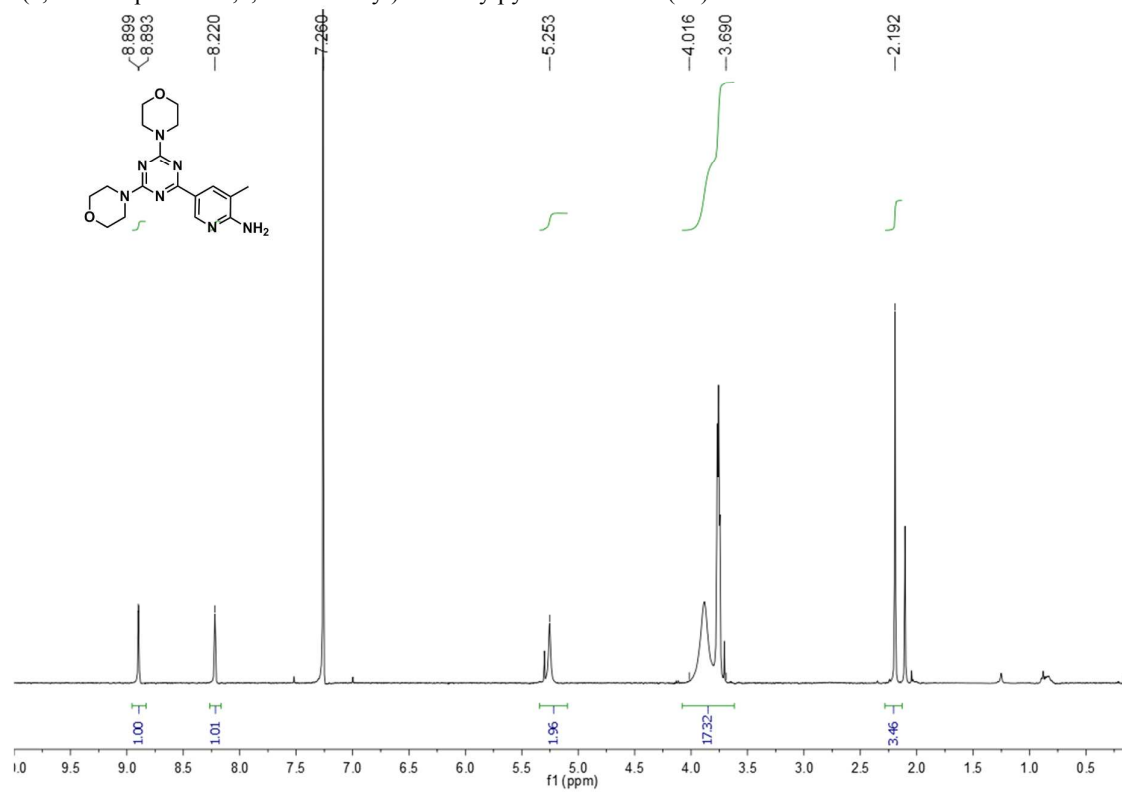

5-(4,6-Dimorpholino-1,3,5-triazin-2-yl)-3-(trifluoromethyl)pyridin-2-amine (**15**):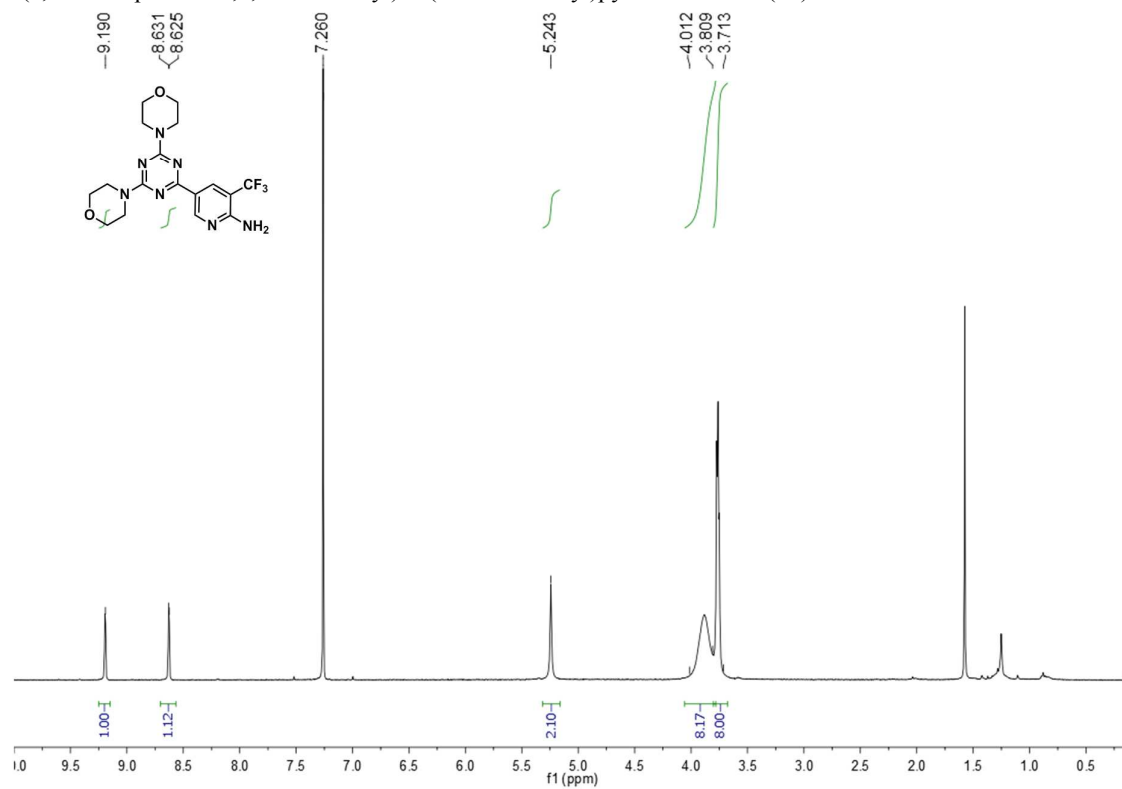5-(4,6-Dimorpholino-1,3,5-triazin-2-yl)-4-methylpyrimidin-2-amine (**16**):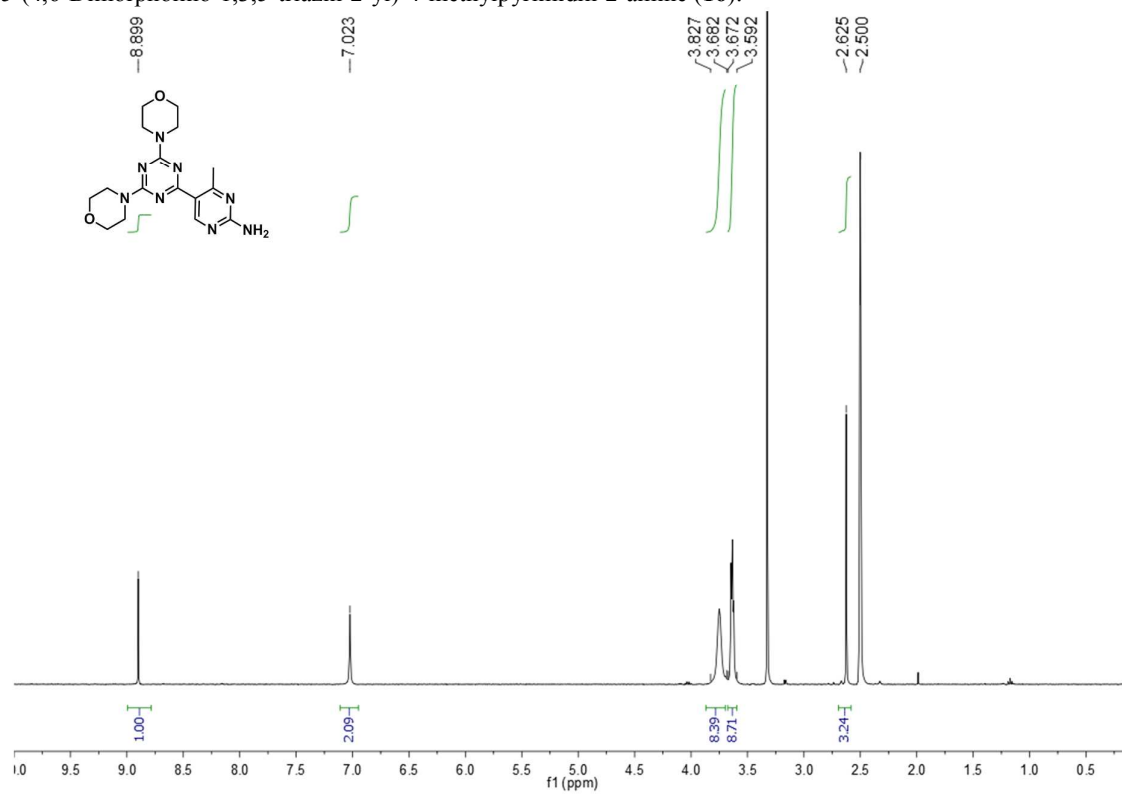

**N-(5-(4,6-Dimorpholino-1,3,5-triazin-2-yl)-4-(trifluoromethyl)pyridin-2-yl)acetamide (17):**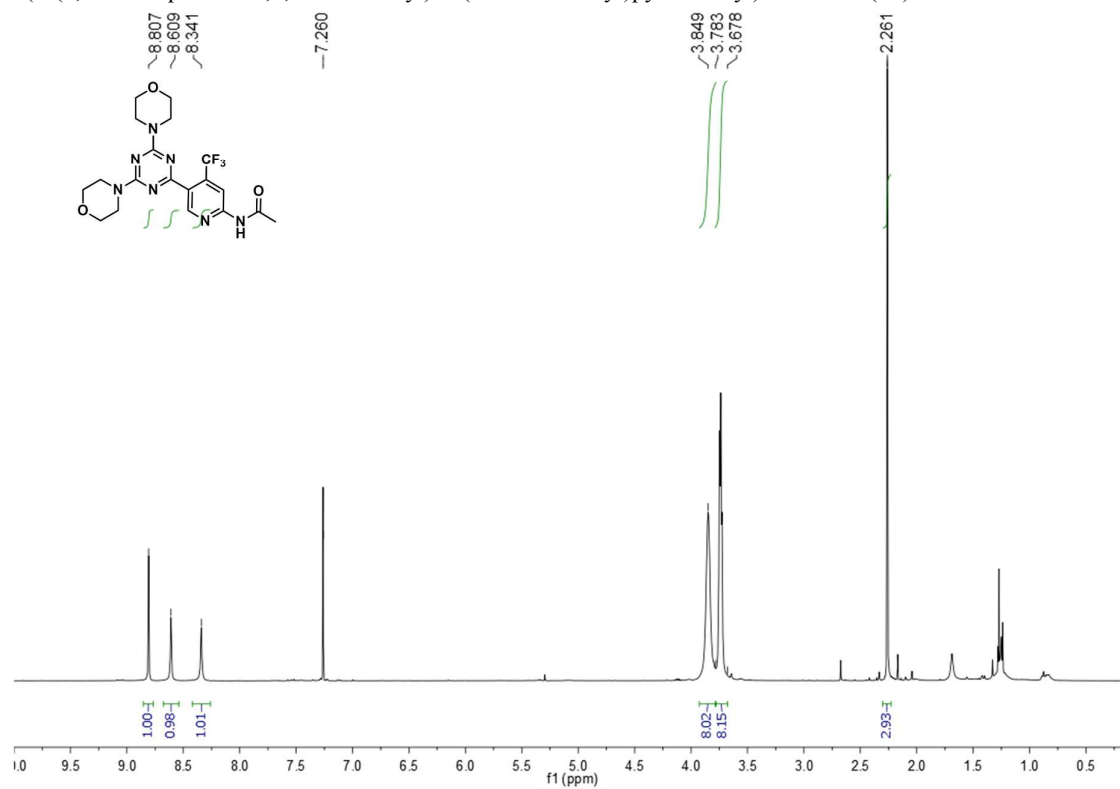**5-(4,6-Dimorpholino-1,3,5-triazin-2-yl)-4-(trifluoromethyl)pyridin-2-ol (18):**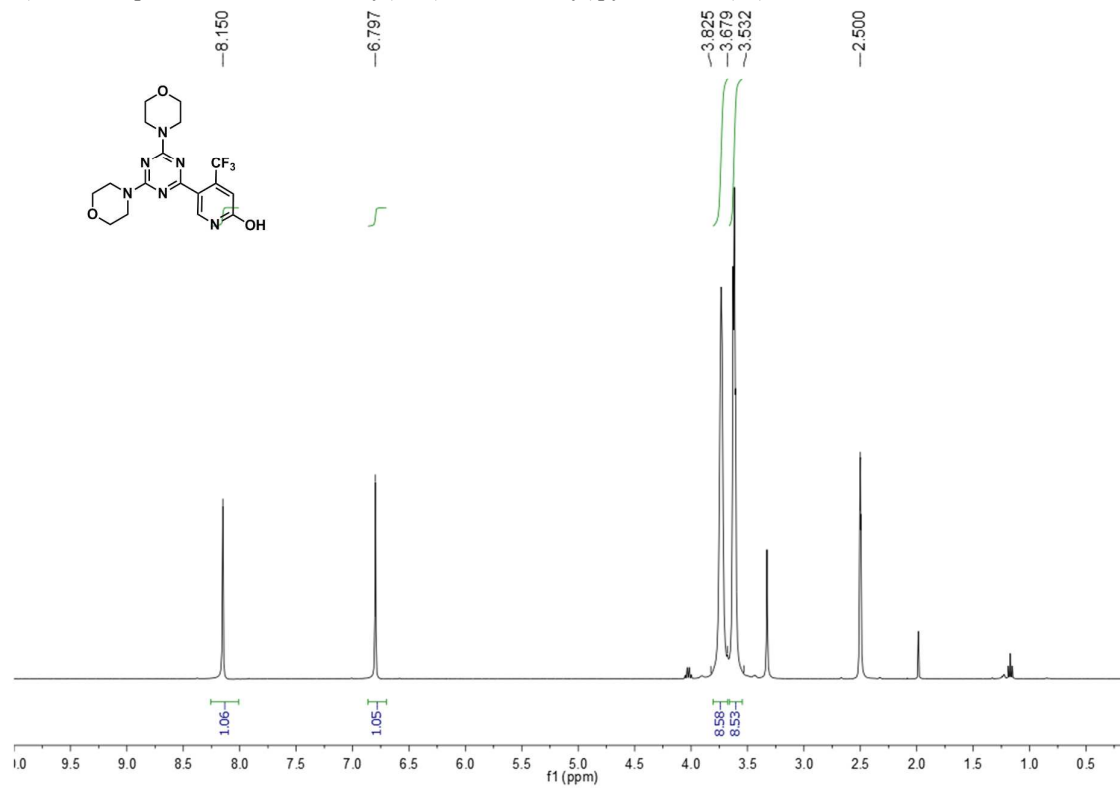

4,4'-(6-(6-Chloro-4-(trifluoromethyl)pyridin-3-yl)-1,3,5-triazine-2,4-diyl)dimorpholine (**19**):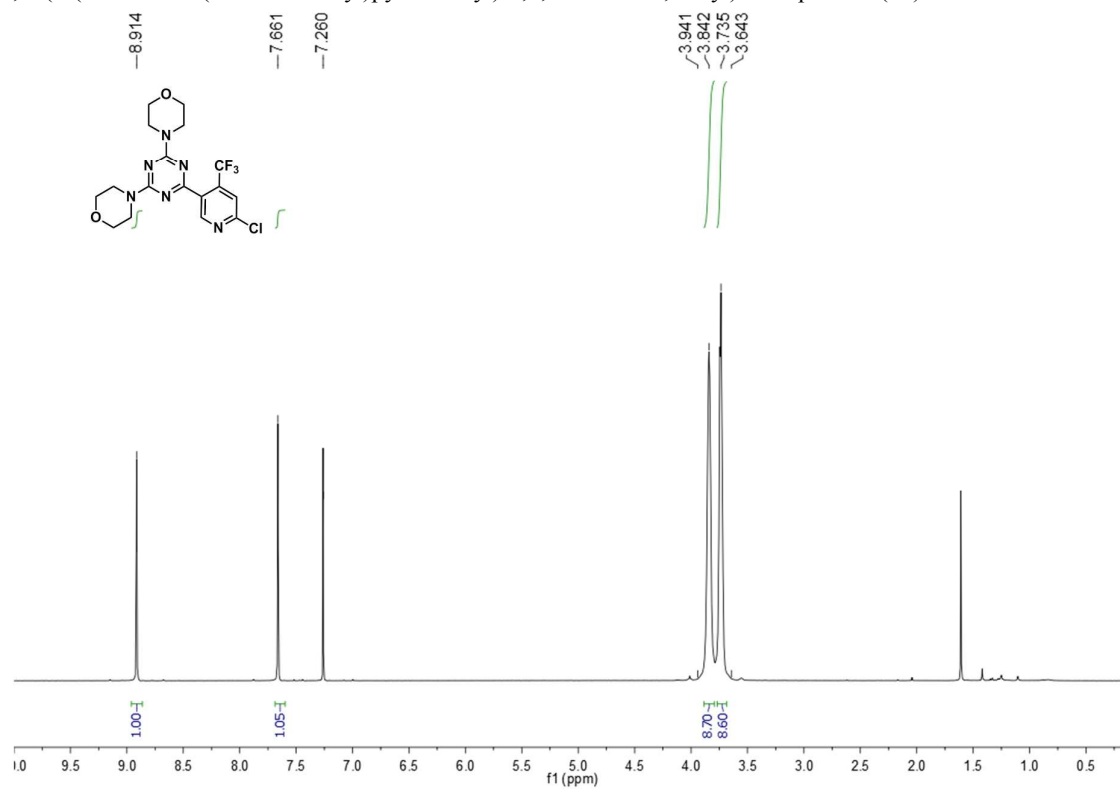*N*-(5-(4,6-Dimorpholino-1,3,5-triazin-2-yl)-4-(trifluoromethyl)pyridin-2-yl)-*O*-methylhydroxylamine (**20**):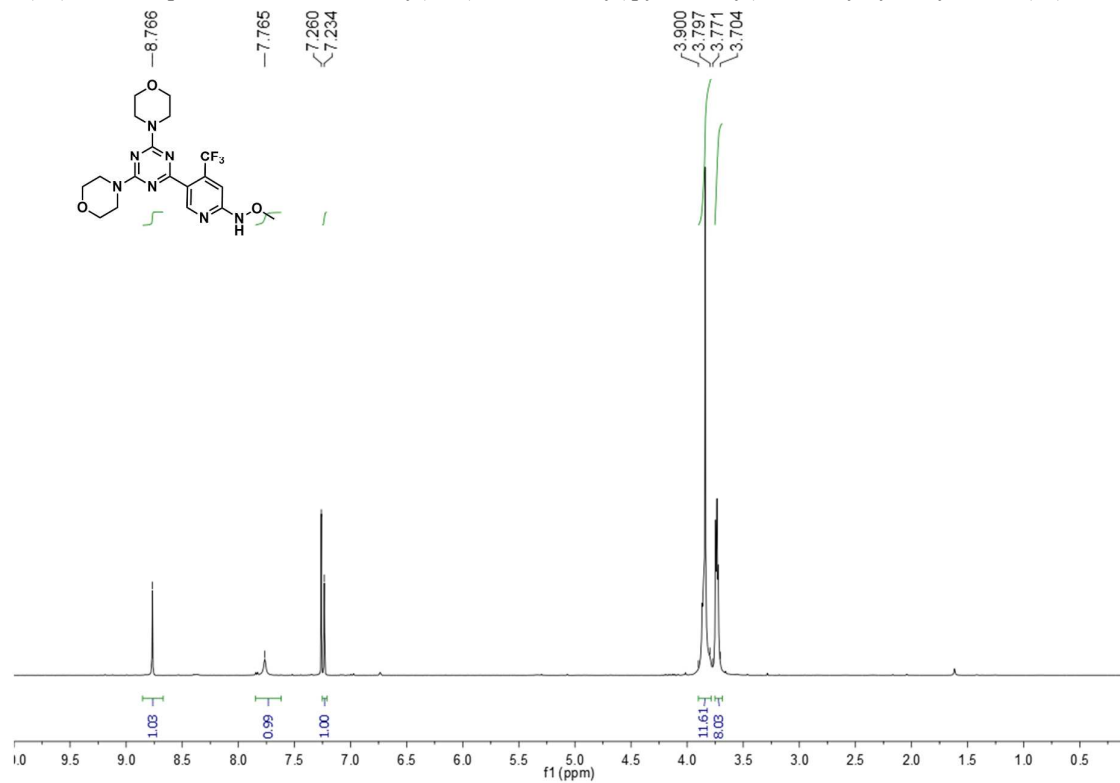

4,4'-(6-(6-Bromo-4-(trifluoromethyl)pyridin-3-yl)-1,3,5-triazine-2,4-diyl)dimorpholine (**21**):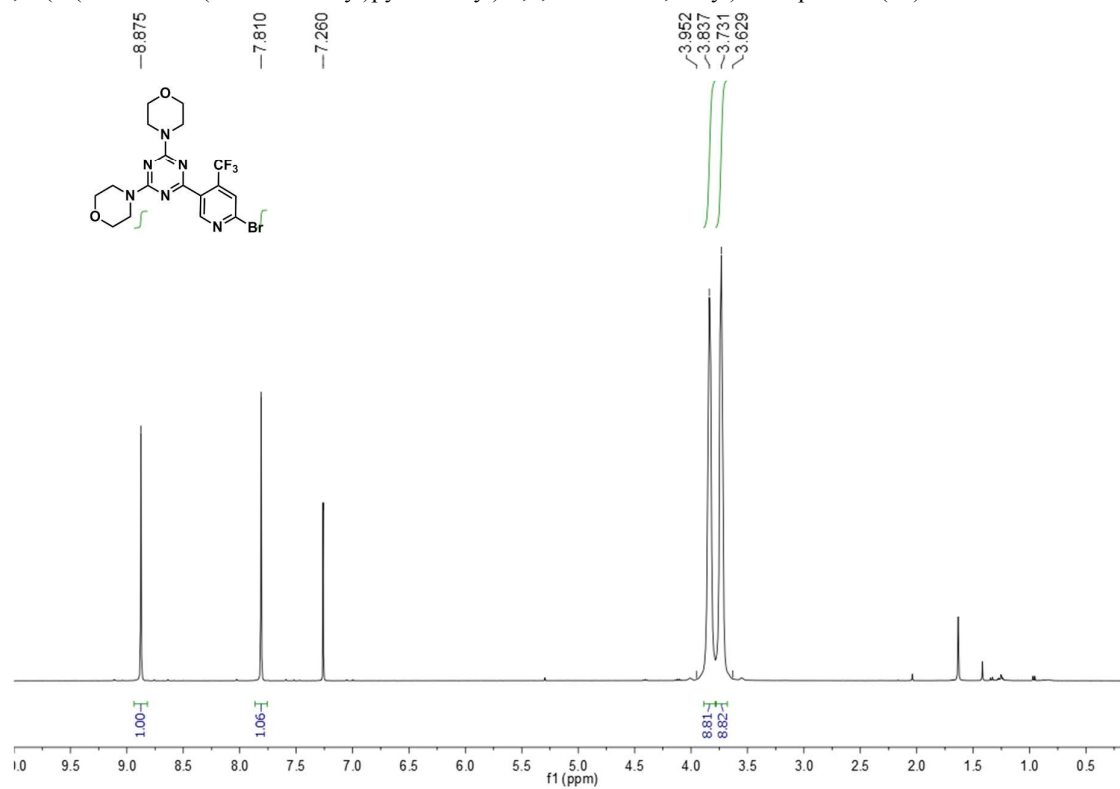*N,N*-Dimethyl-*N'*-(3-methyl-5-(4,4,5,5-tetramethyl-1,3,2-dioxaborolan-2-yl)pyridin-2-yl)formimidamide (**23**):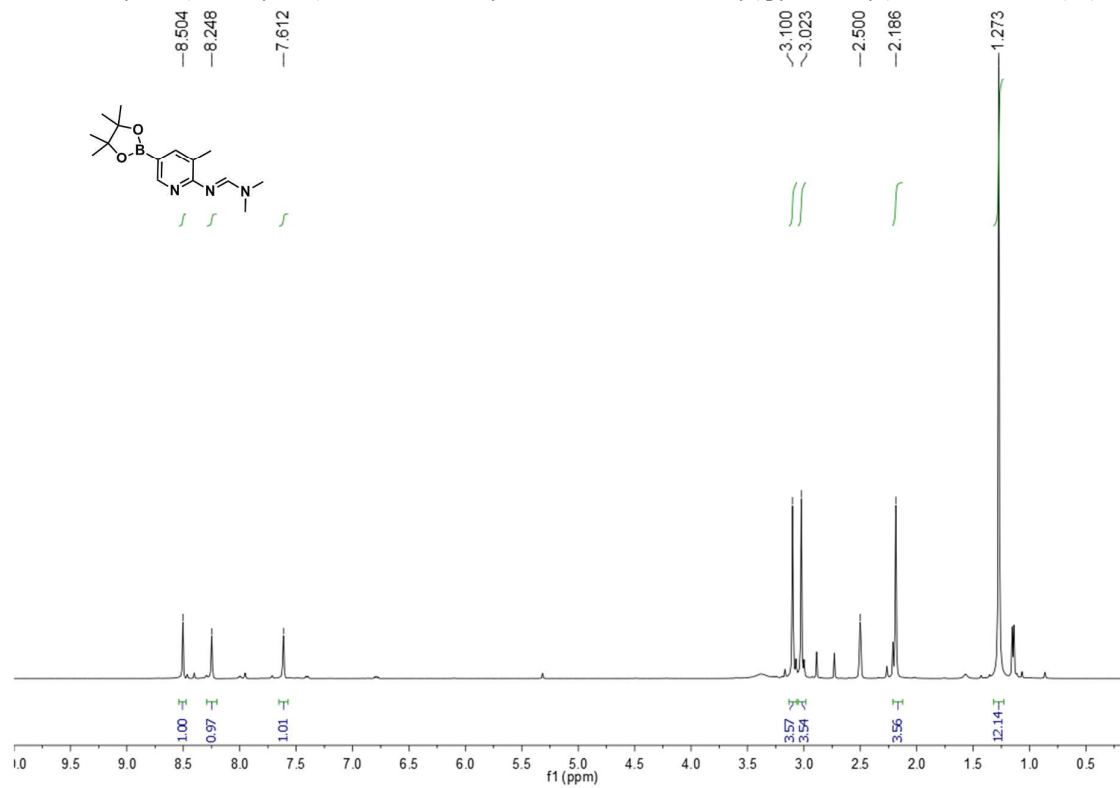



*N,N*-Dimethyl-*N'*-(5-(4,4,5,5-tetramethyl-1,3,2-dioxaborolan-2-yl)-3-(trifluoromethyl)pyridin-2-yl)formimidamide (**24**):

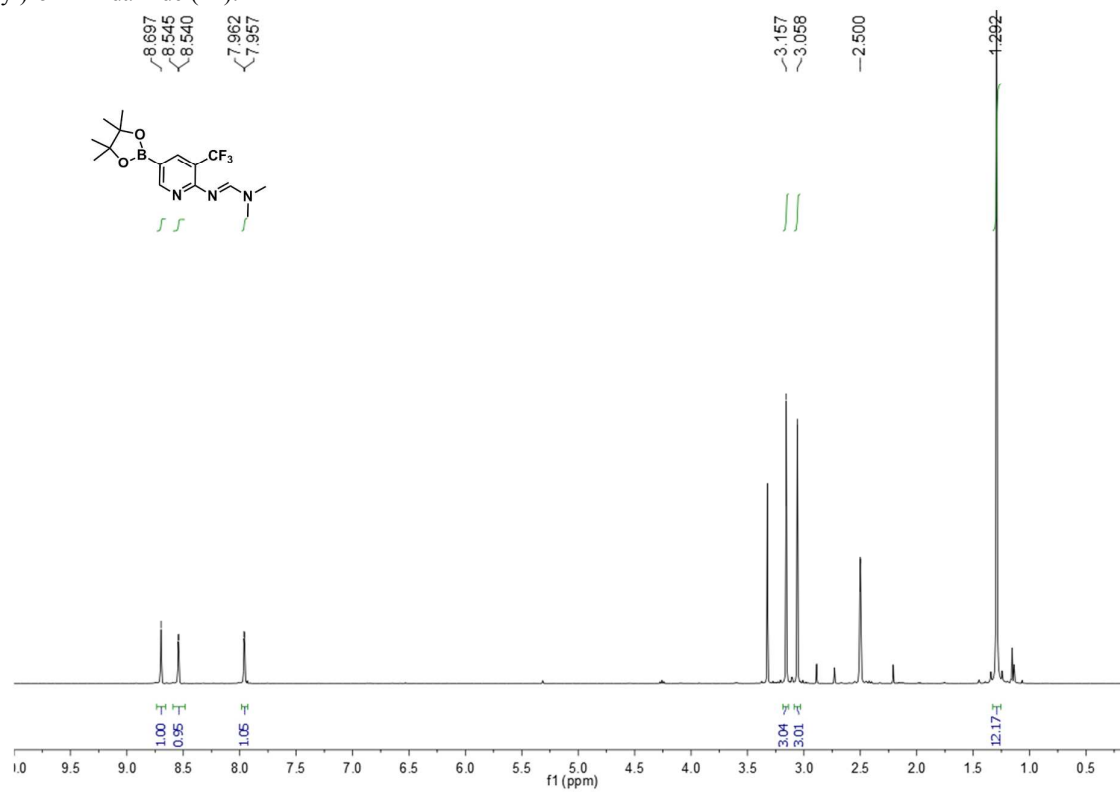

**$^{19}\text{F}\{^1\text{H}\}$  NMR Spectra:**5-(4,6-Dimorpholino-1,3,5-triazin-2-yl)-4-(trifluoromethyl)pyrimidin-2-amine (**2**):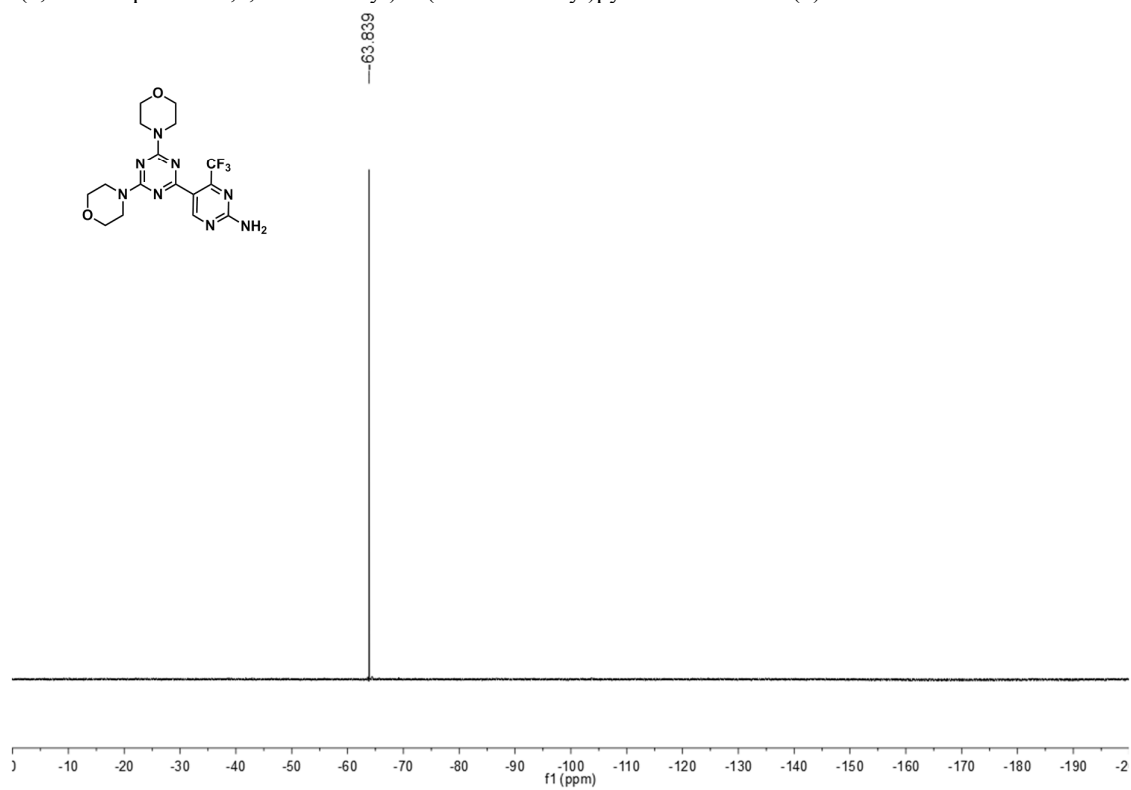5-(4,6-Dimorpholino-1,3,5-triazin-2-yl)-3-(trifluoromethyl)pyridin-2-amine (**15**):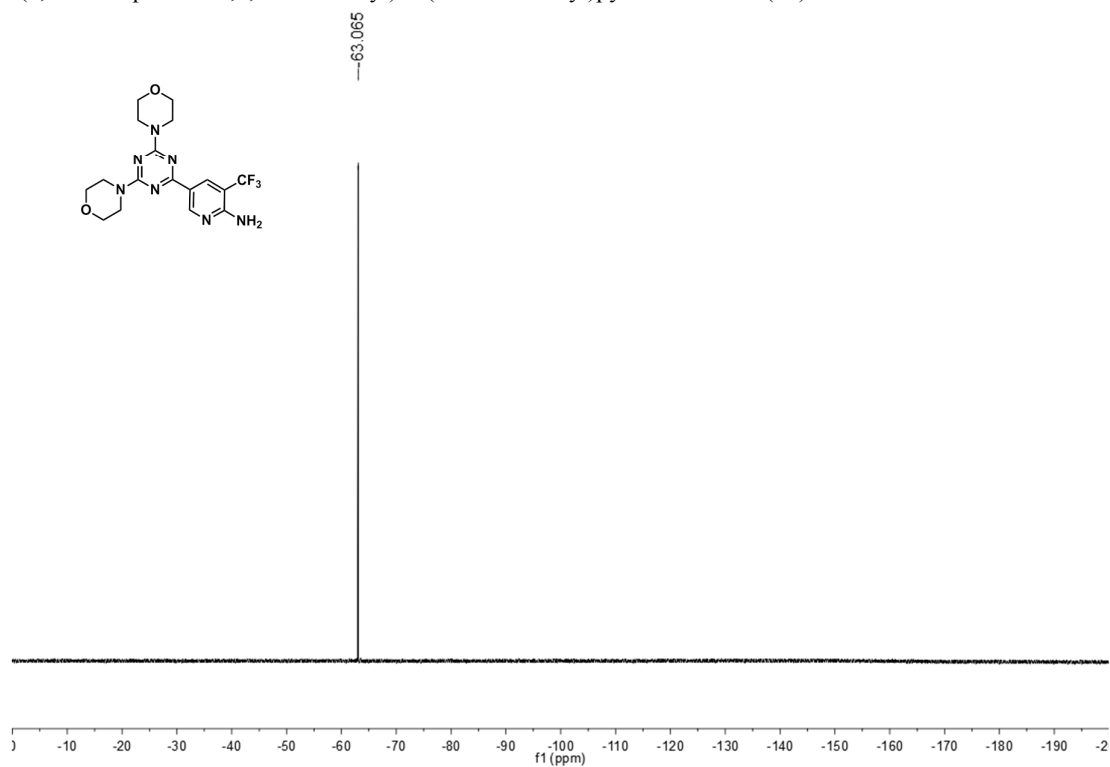

*N*-(5-(4,6-Dimorpholino-1,3,5-triazin-2-yl)-4-(trifluoromethyl)pyridin-2-yl)acetamide (**17**):

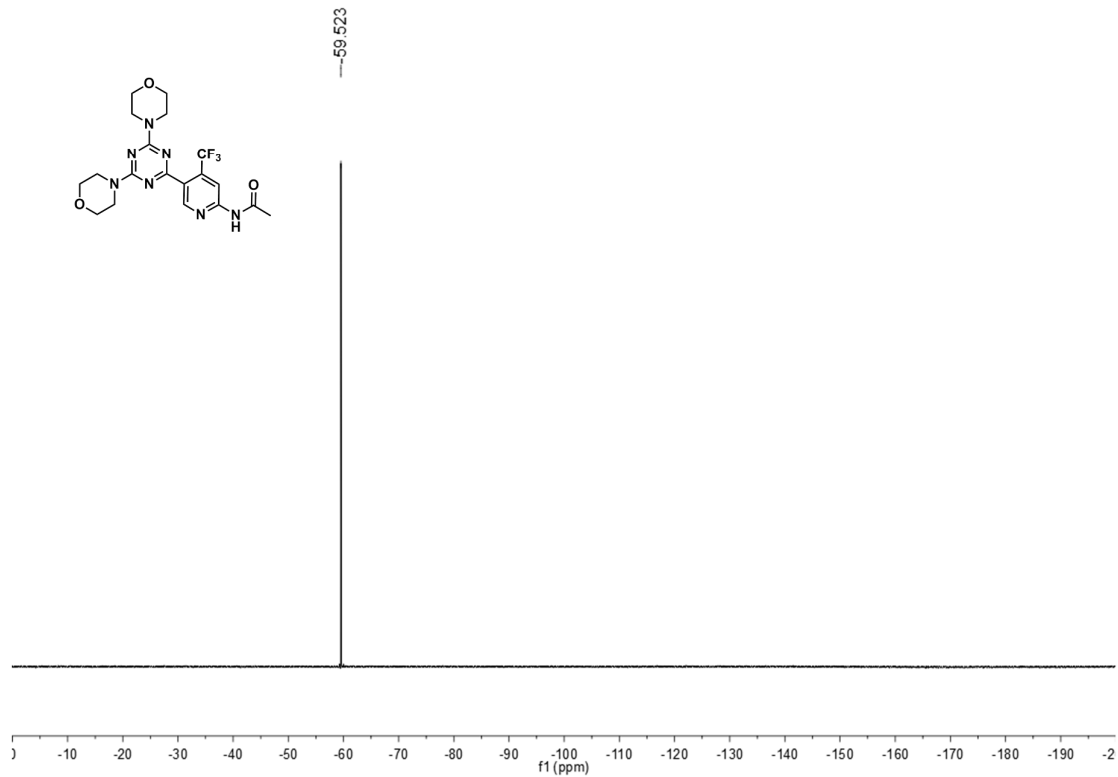

5-(4,6-Dimorpholino-1,3,5-triazin-2-yl)-4-(trifluoromethyl)pyridin-2-ol (**18**):

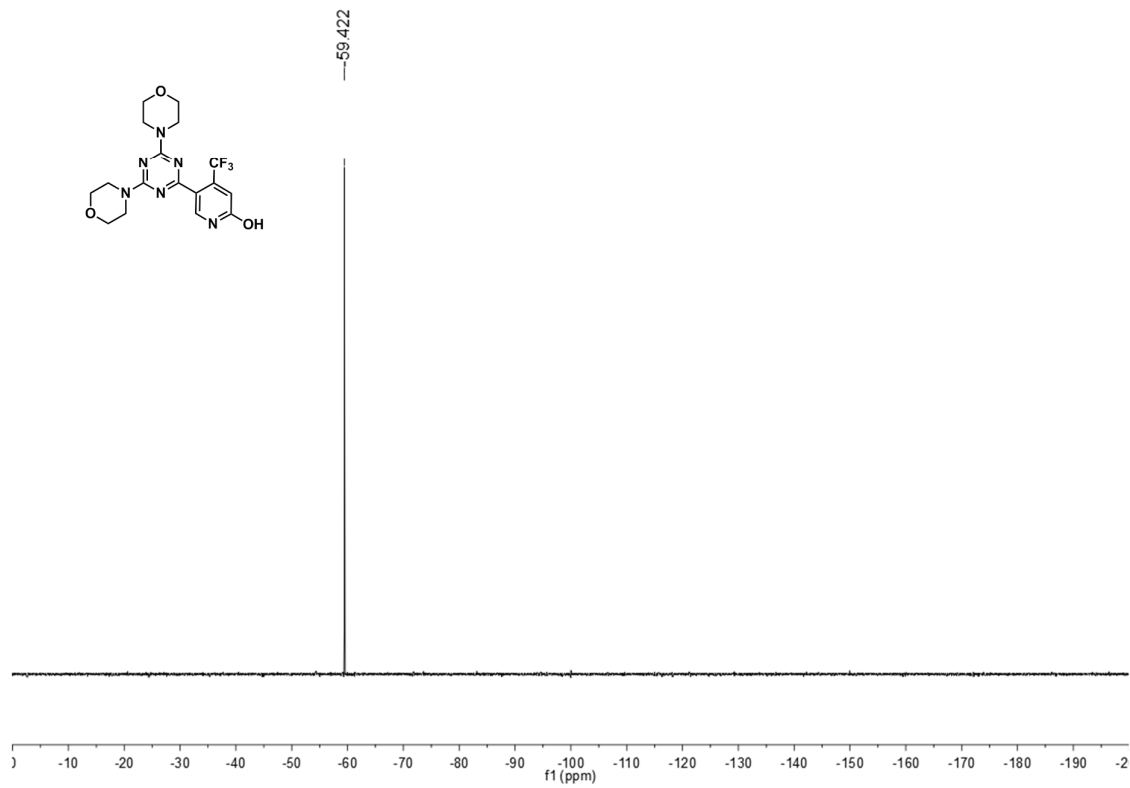

4,4'-(6-(6-Chloro-4-(trifluoromethyl)pyridin-3-yl)-1,3,5-triazine-2,4-diyl)dimorpholine (**19**):

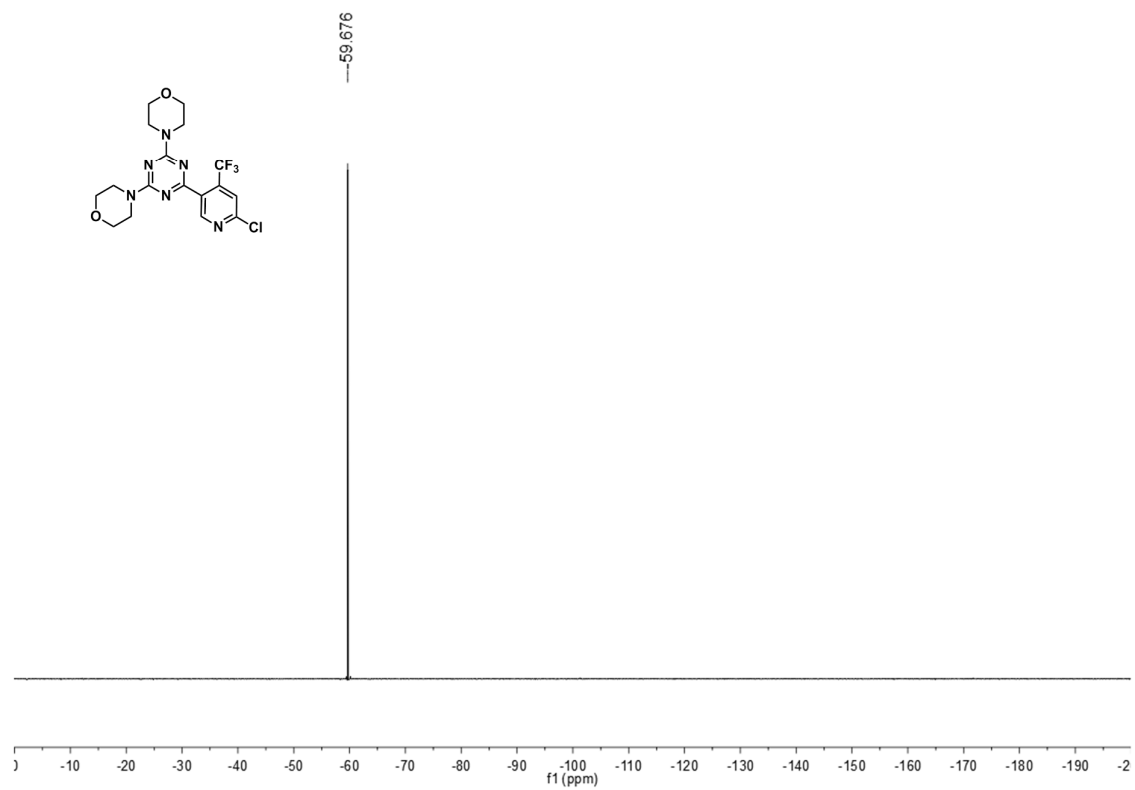

*N*-(5-(4,6-Dimorpholino-1,3,5-triazin-2-yl)-4-(trifluoromethyl)pyridin-2-yl)-*O*-methylhydroxylamine (**20**):

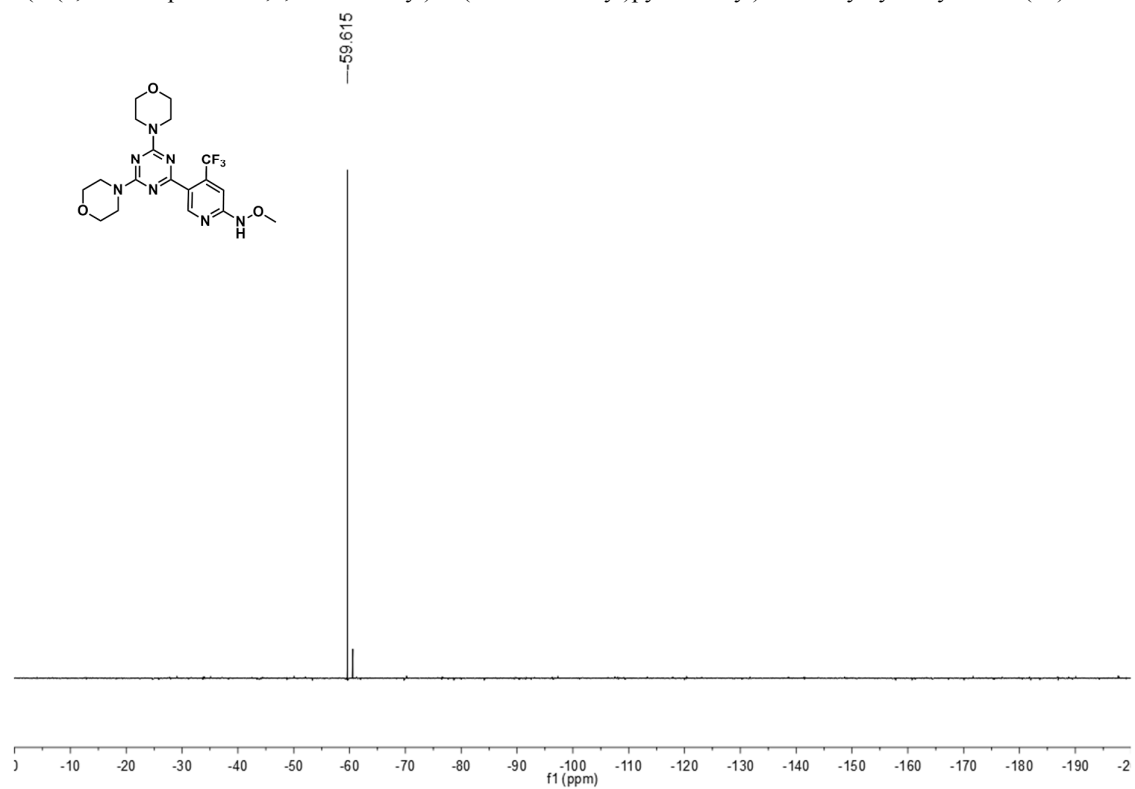

4,4'-(6-(6-Bromo-4-(trifluoromethyl)pyridin-3-yl)-1,3,5-triazine-2,4-diyl)dimorpholine (**21**):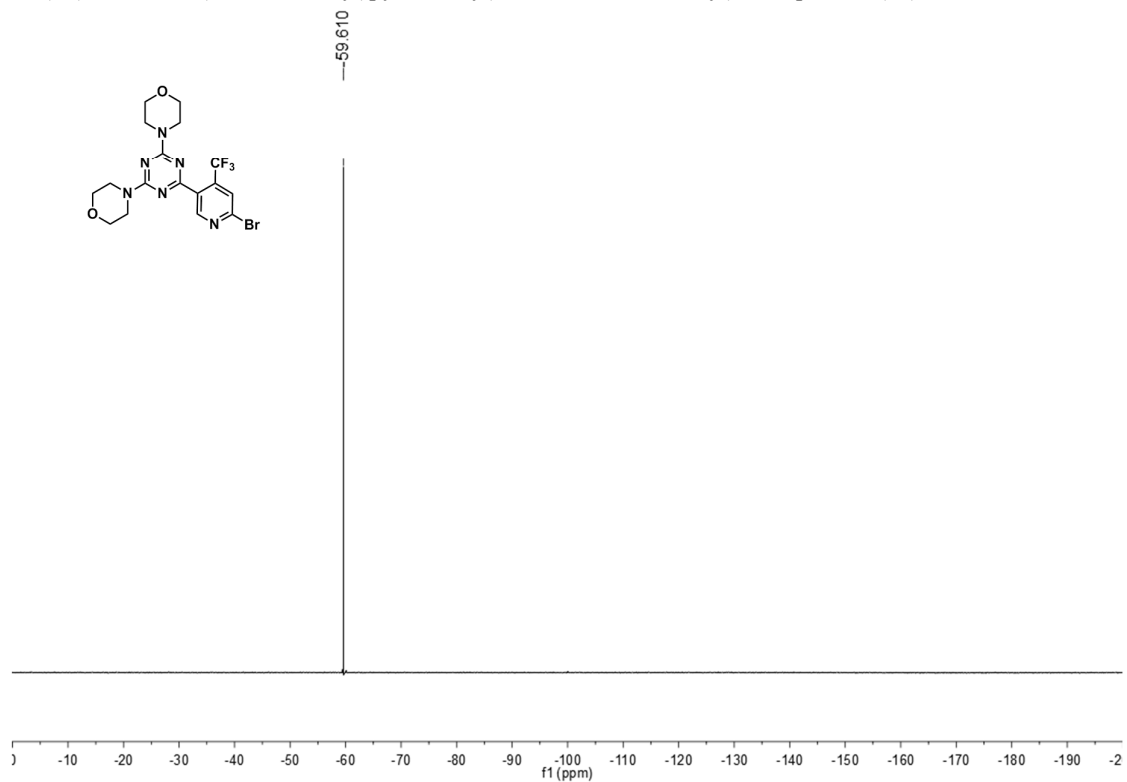*N,N*-Dimethyl-*N'*-(5-(4,4,5,5-tetramethyl-1,3,2-dioxaborolan-2-yl)-3-(trifluoromethyl)pyridin-2-yl)formimidamide (**24**):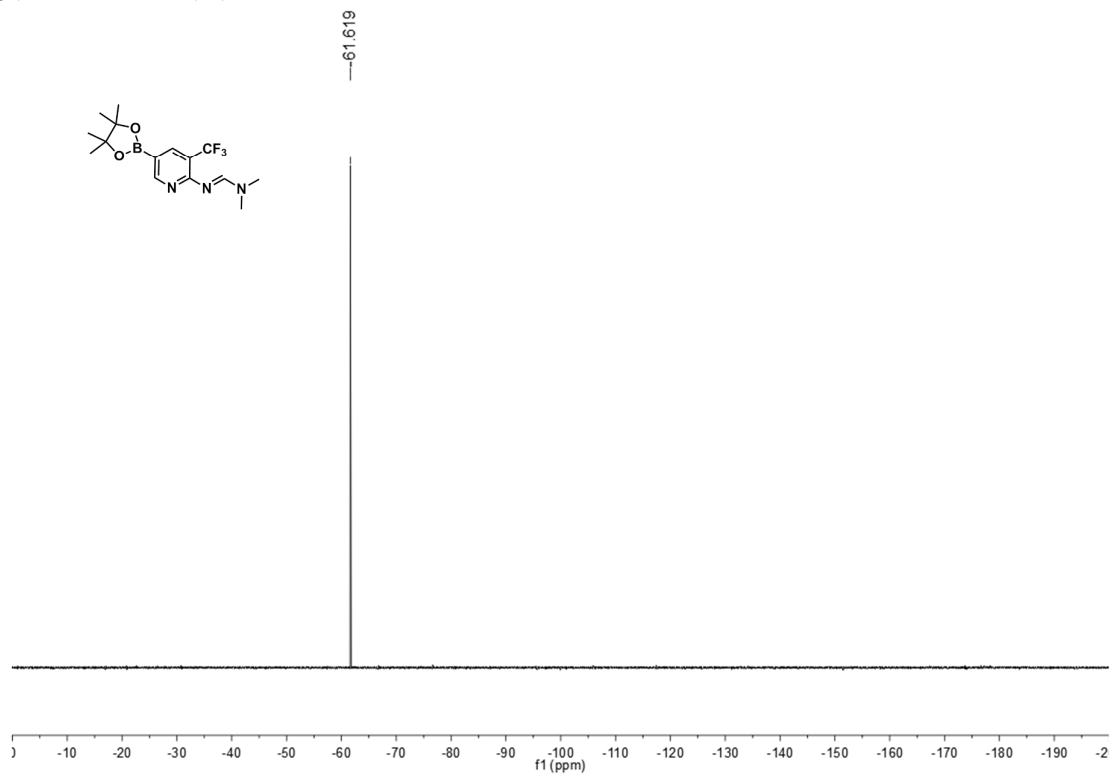

**$^{13}\text{C}\{^1\text{H}\}$  NMR Spectra.**5-(4,6-Dimorpholino-1,3,5-triazin-2-yl)-4-(trifluoromethyl)pyrimidin-2-amine (**2**):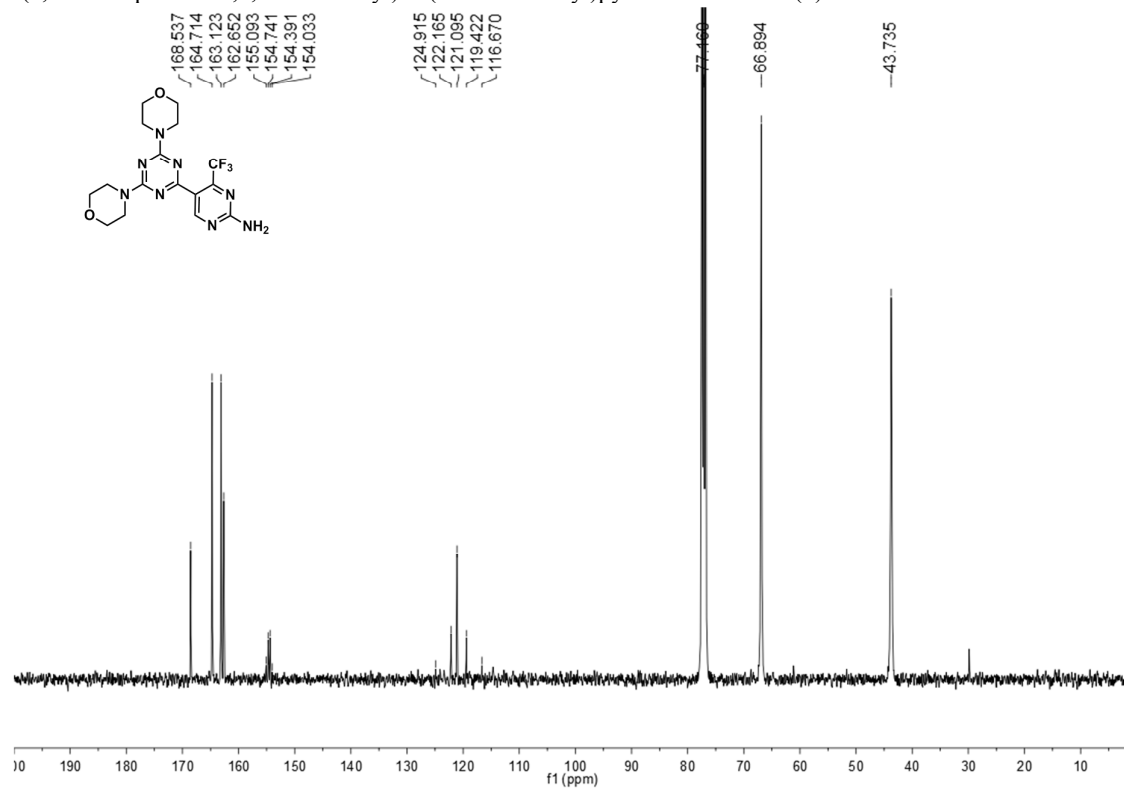4,4'-(6-Iodo-1,3,5-triazine-2,4-diyl)dimorpholine (**8**):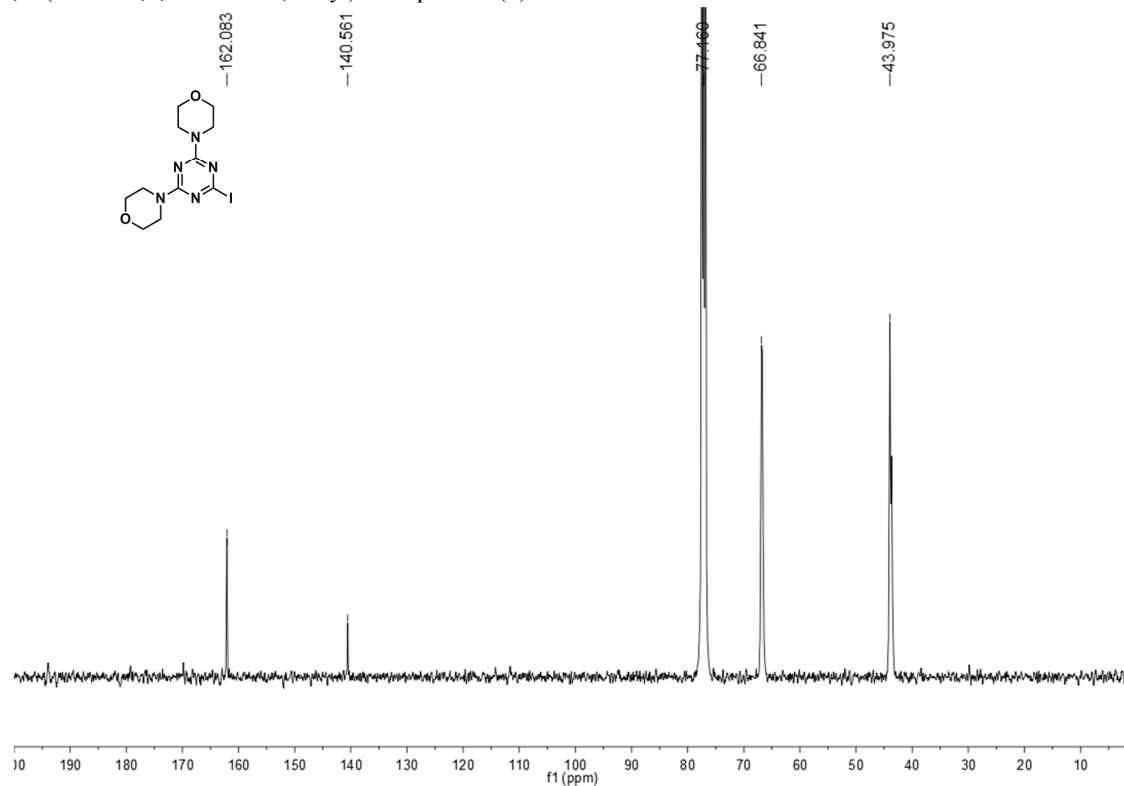

4-(4,6-Dimorpholino-1,3,5-triazin-2-yl)aniline (**9**):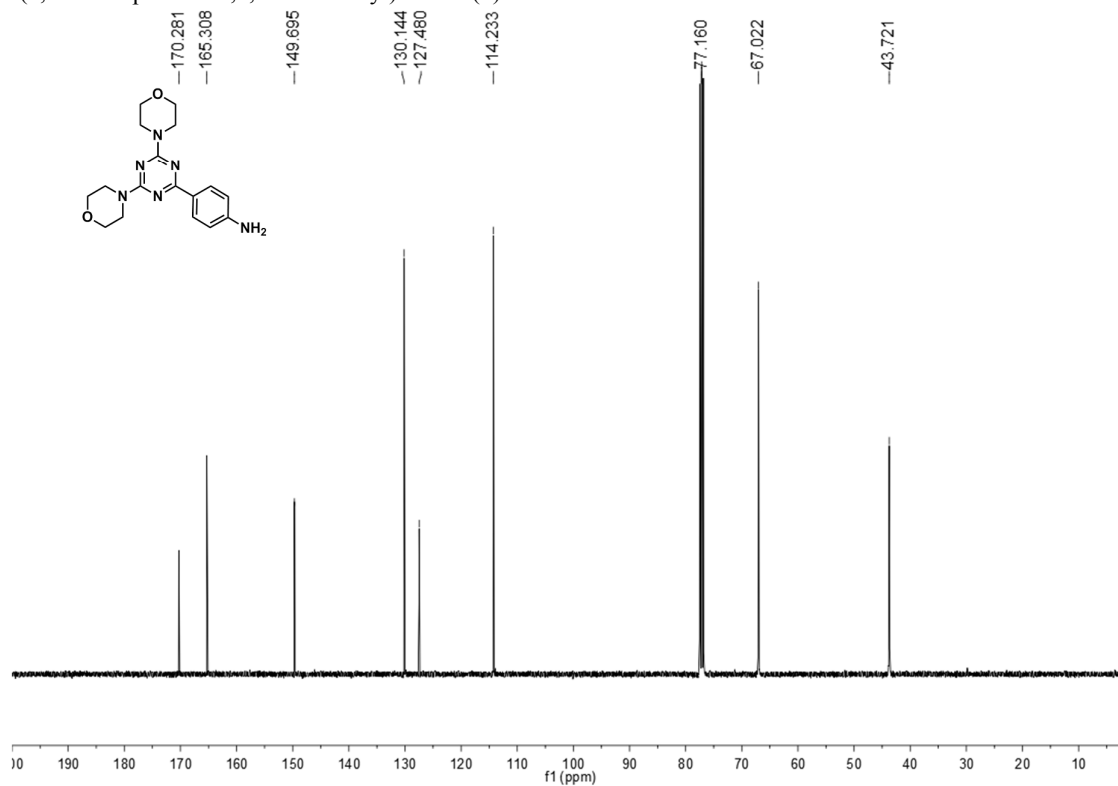5-(4,6-Dimorpholino-1,3,5-triazin-2-yl)pyridin-2-amine (**10**):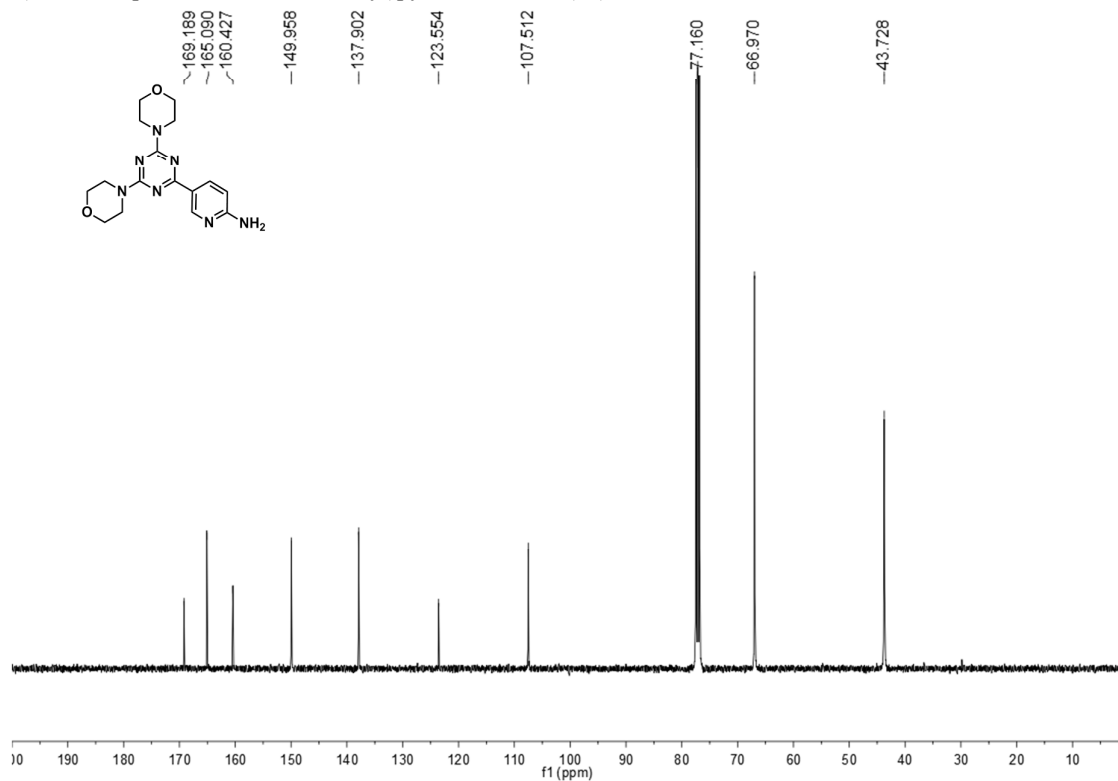

5-(4,6-Dimorpholino-1,3,5-triazin-2-yl)pyrimidin-2-amine (**11**):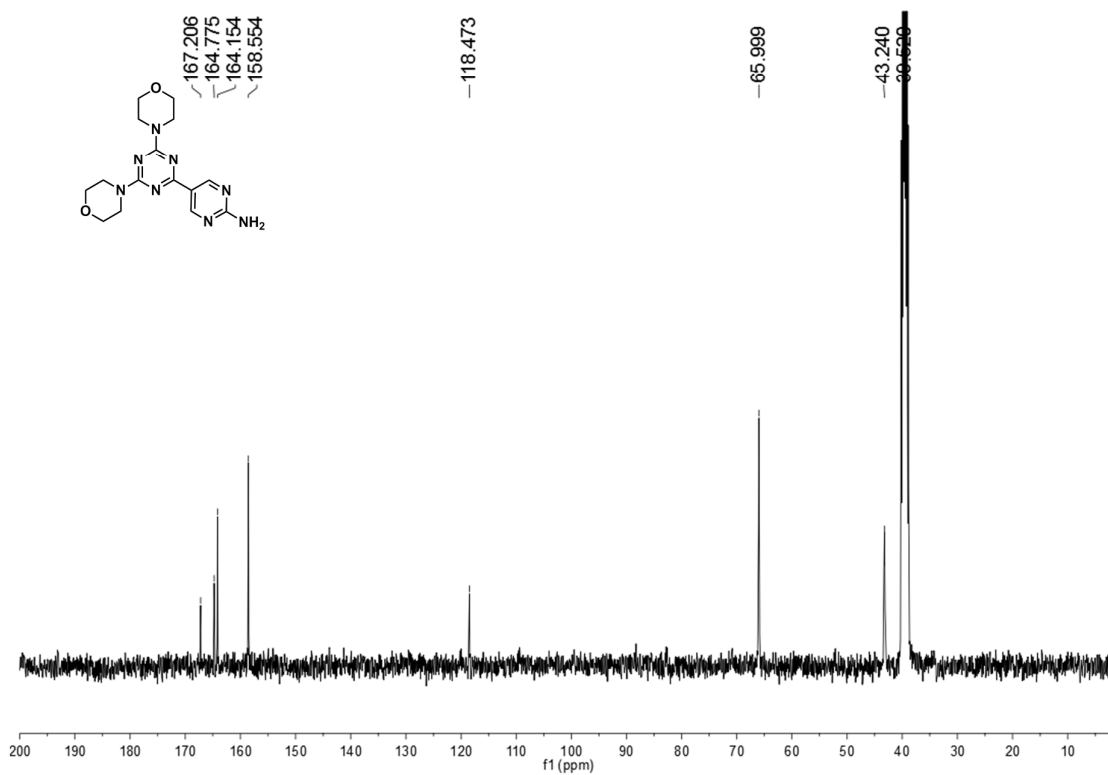5-(4,6-Dimorpholino-1,3,5-triazin-2-yl)pyrazin-2-amine (**12**):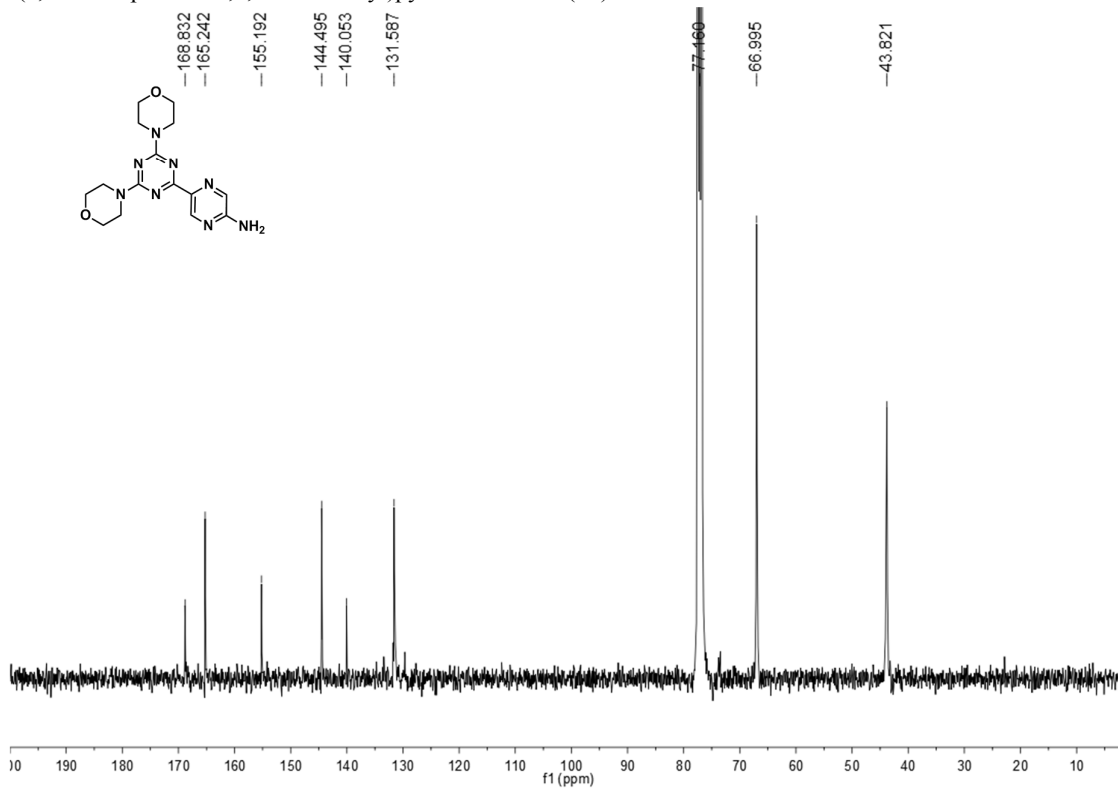



5-(4,6-Dimorpholino-1,3,5-triazin-2-yl)-4-methylpyridin-2-amine (**13**):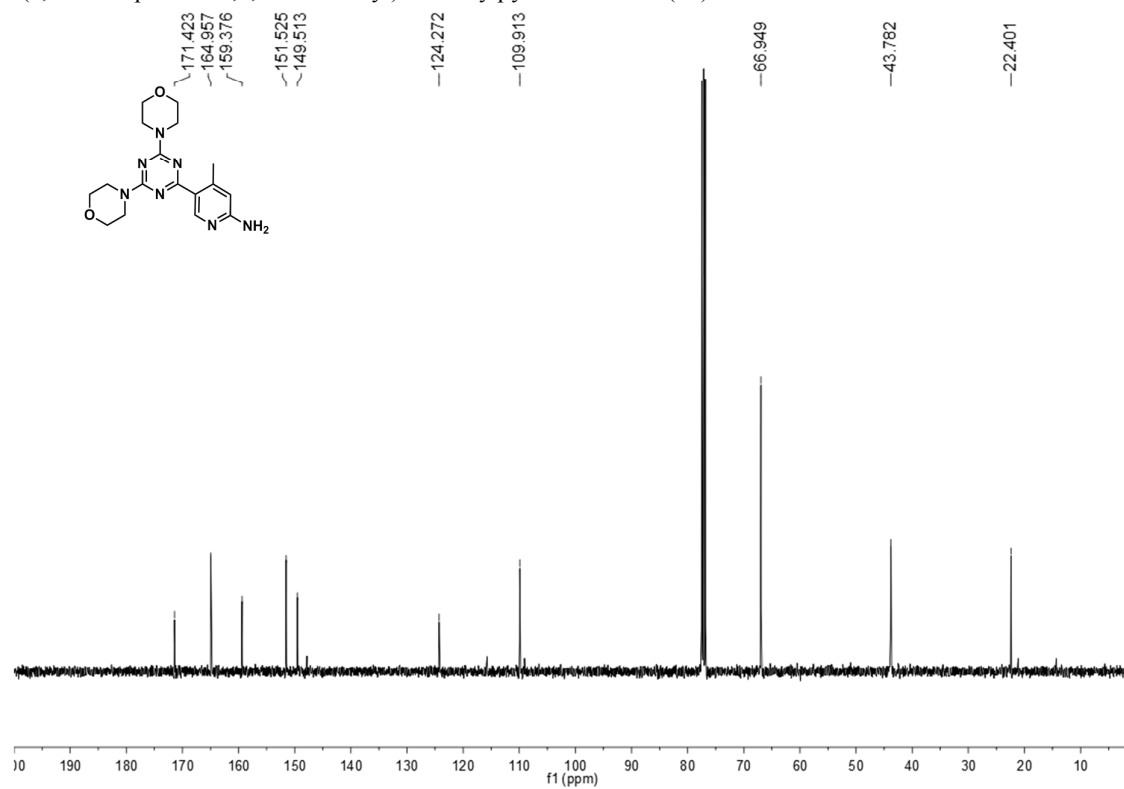5-(4,6-Dimorpholino-1,3,5-triazin-2-yl)-3-methylpyridin-2-amine (**14**):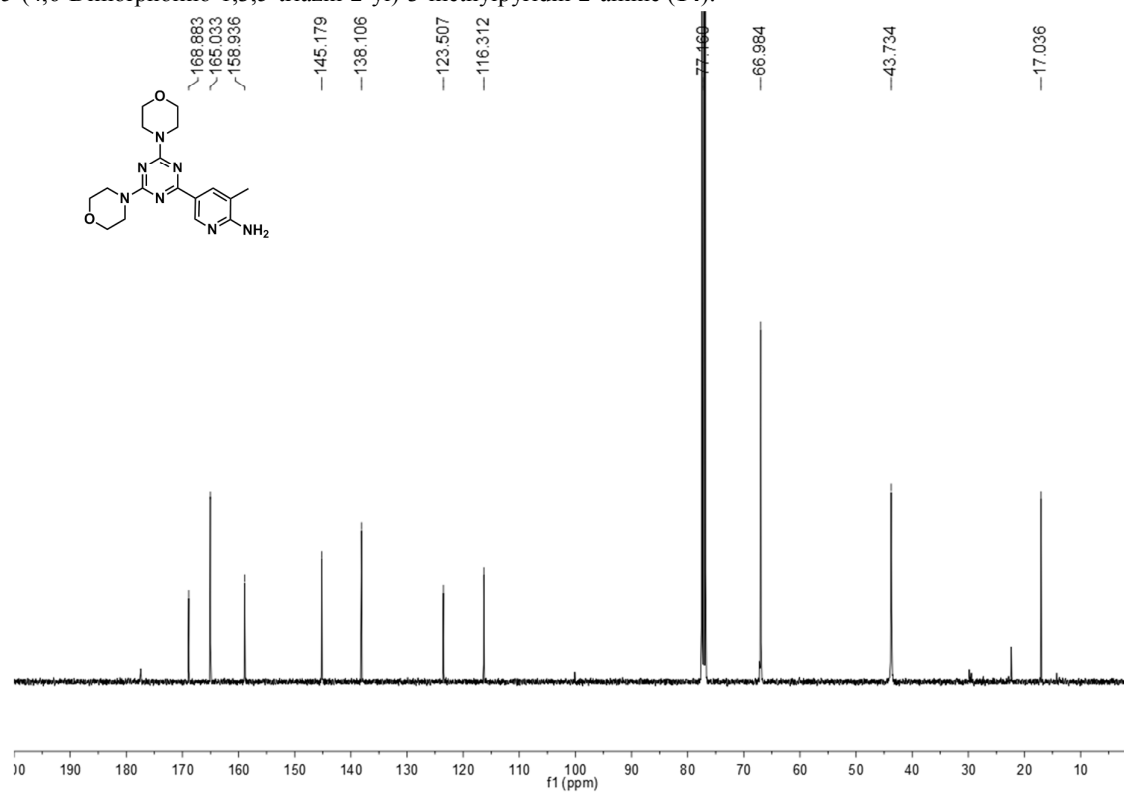

5-(4,6-Dimorpholino-1,3,5-triazin-2-yl)-3-(trifluoromethyl)pyridin-2-amine (**15**):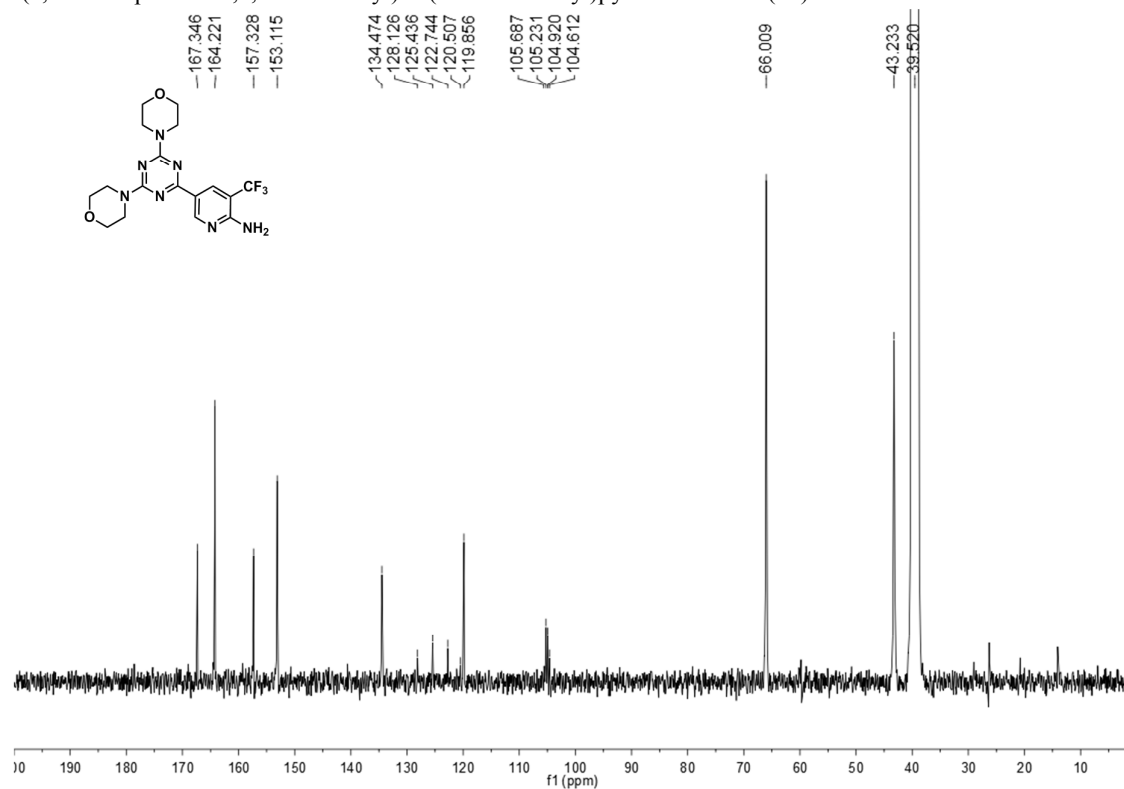5-(4,6-Dimorpholino-1,3,5-triazin-2-yl)-4-methylpyrimidin-2-amine (**16**):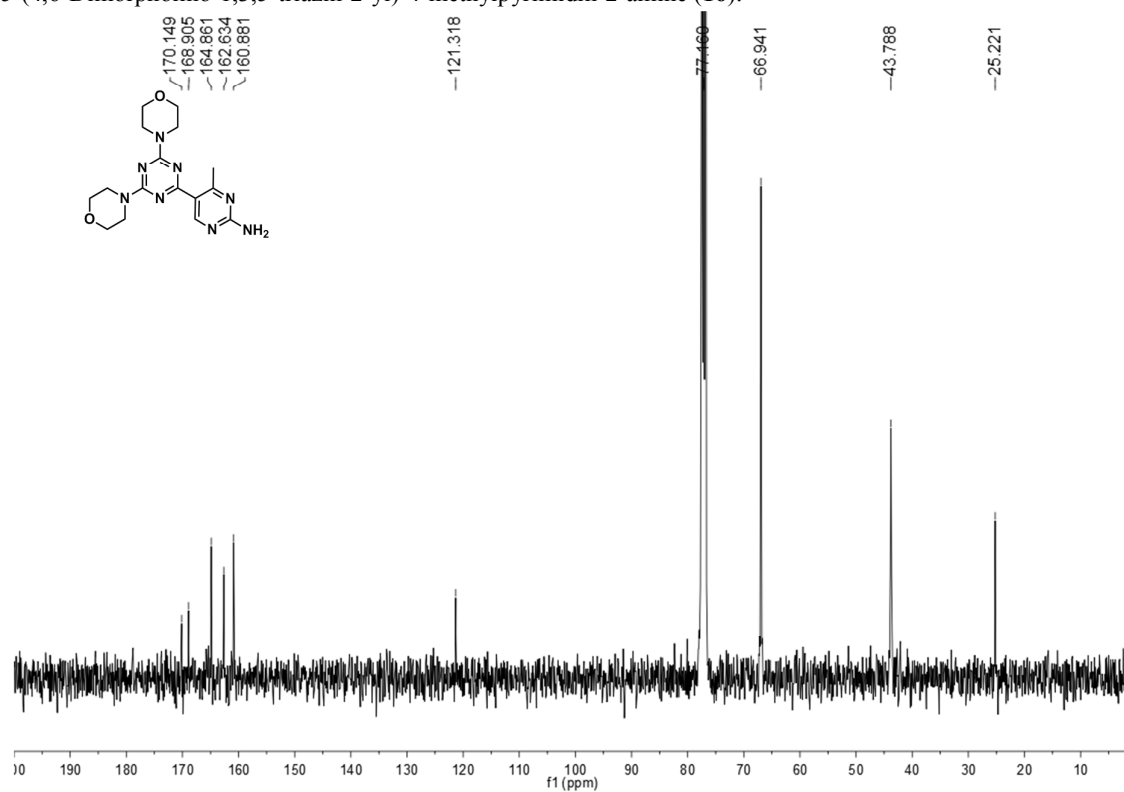

***N*-(5-(4,6-Dimorpholino-1,3,5-triazin-2-yl)-4-(trifluoromethyl)pyridin-2-yl)acetamide (17):**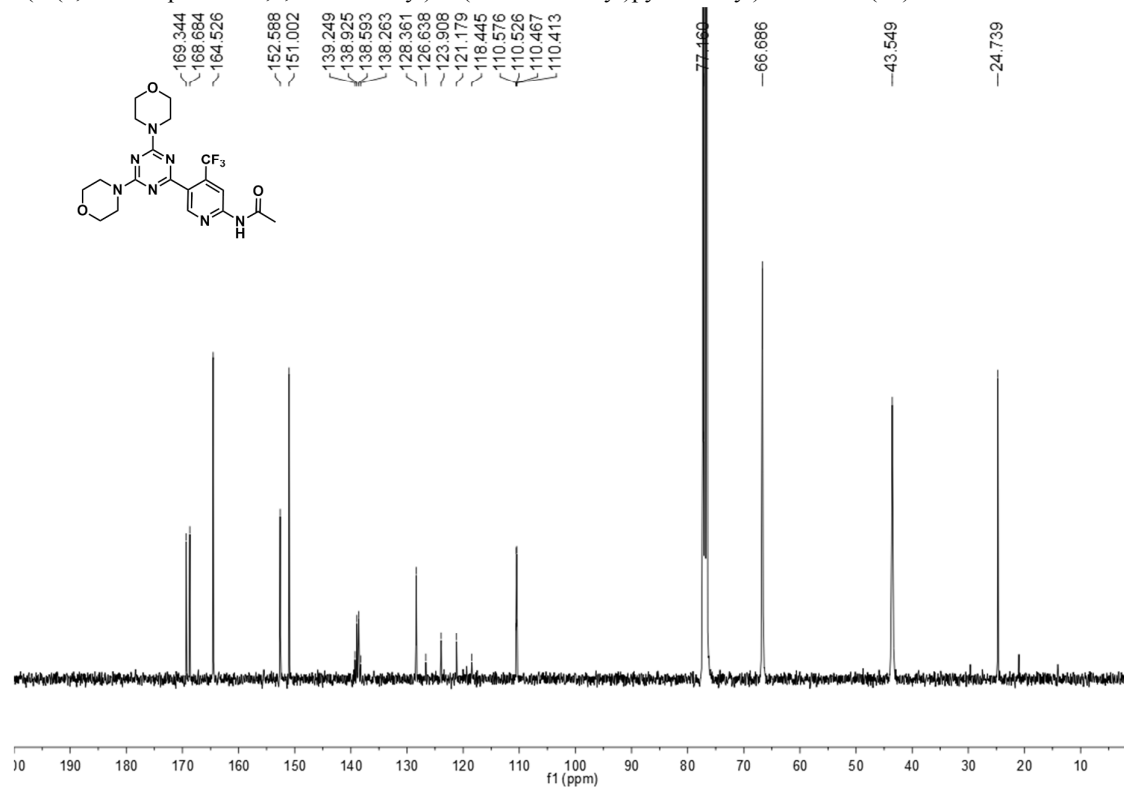**5-(4,6-Dimorpholino-1,3,5-triazin-2-yl)-4-(trifluoromethyl)pyridin-2-ol (18):**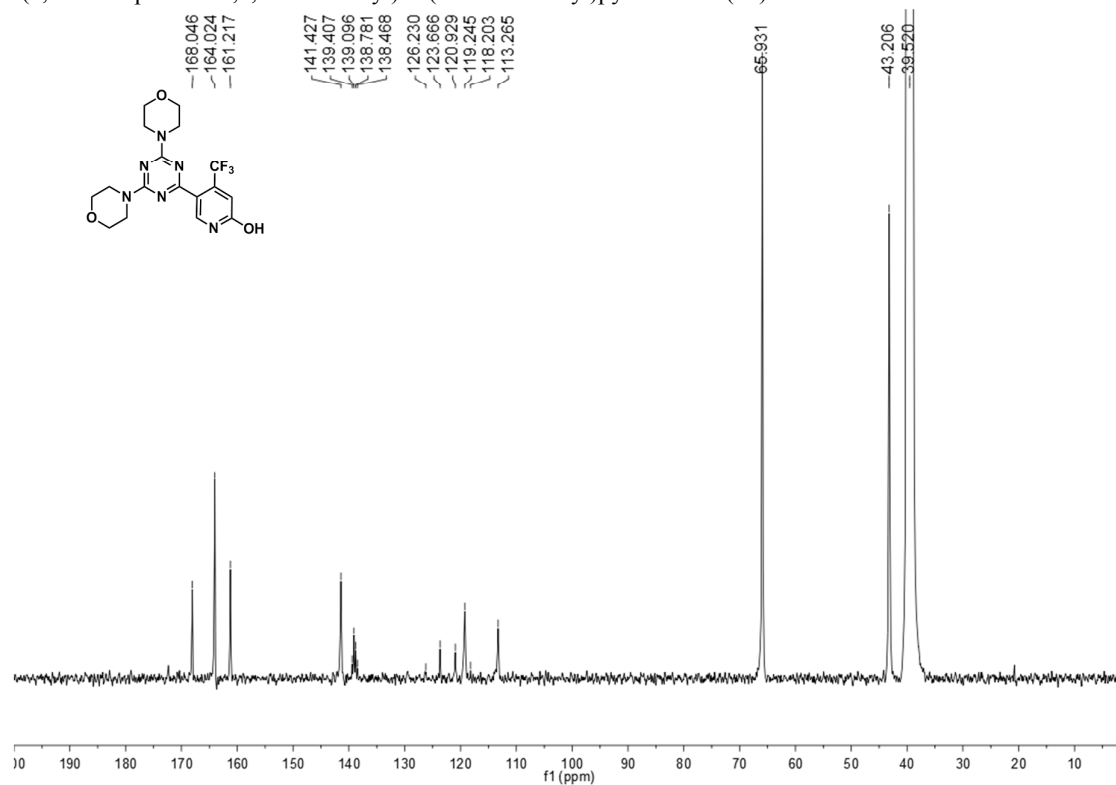

4,4'-(6-(6-Chloro-4-(trifluoromethyl)pyridin-3-yl)-1,3,5-triazine-2,4-diyl)dimorpholine (**19**):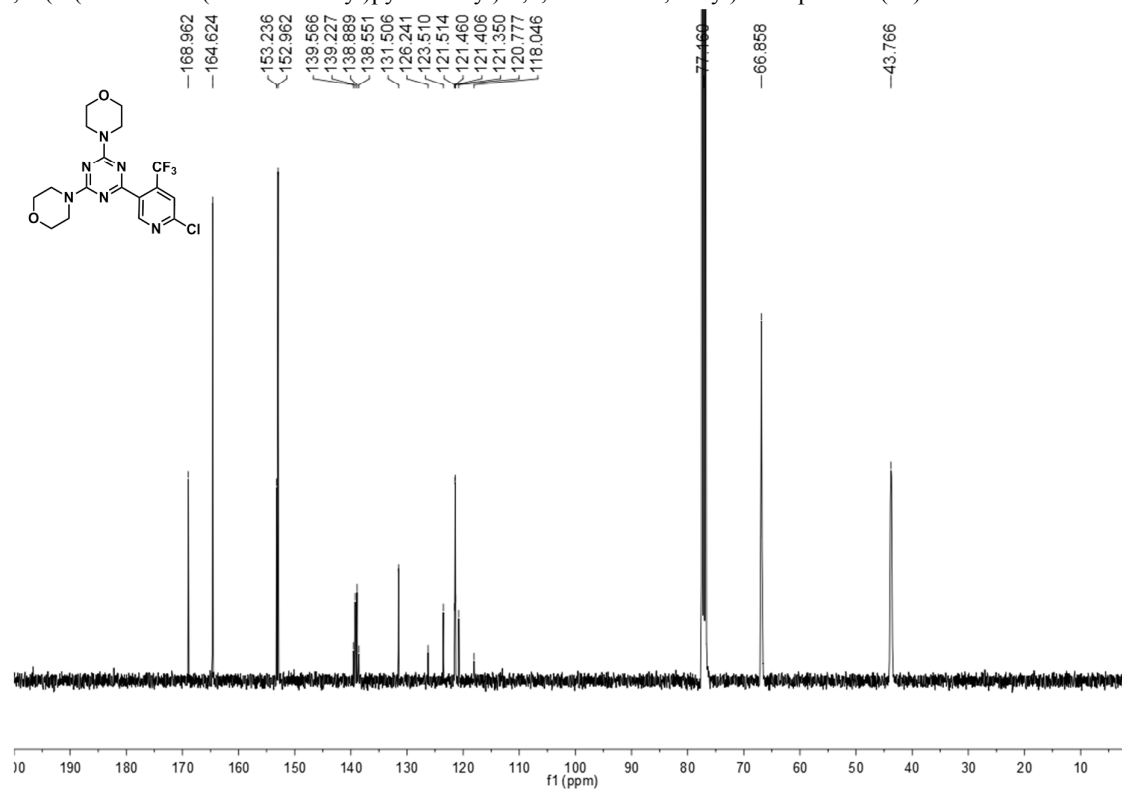*N*-(5-(4,6-Dimorpholino-1,3,5-triazin-2-yl)-4-(trifluoromethyl)pyridin-2-yl)-*O*-methylhydroxylamine (**20**):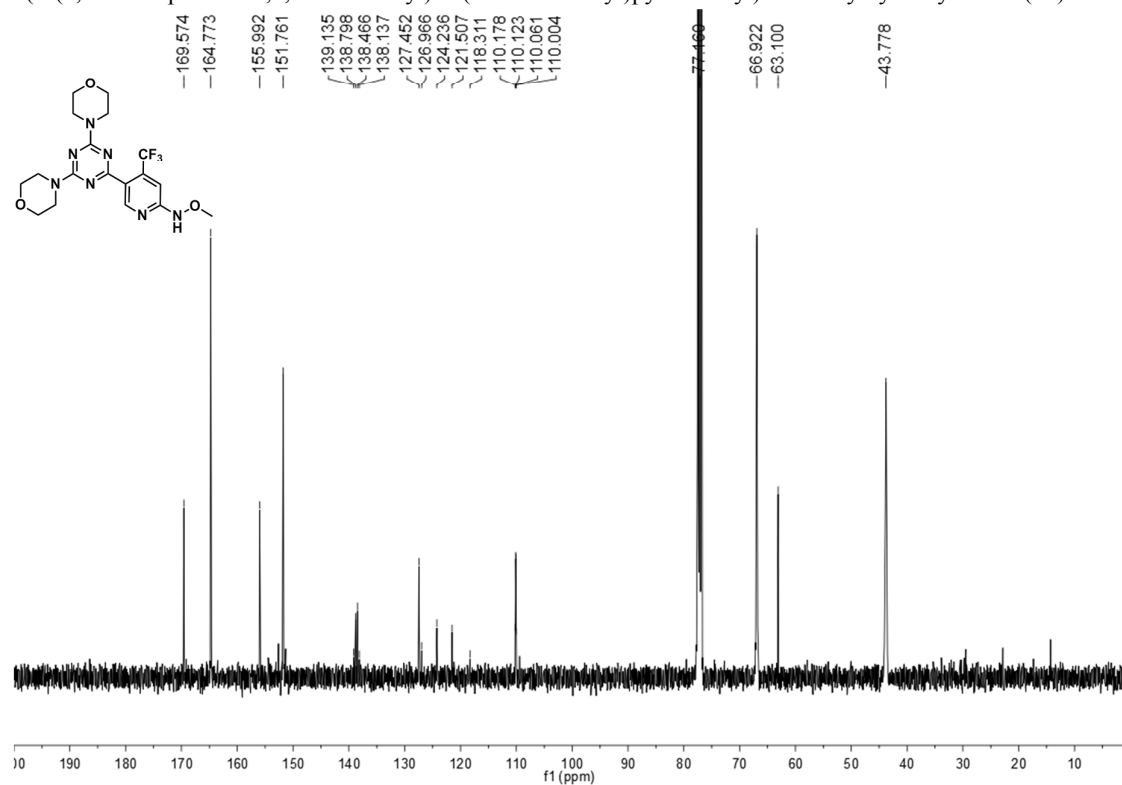

4,4'-(6-(6-Bromo-4-(trifluoromethyl)pyridin-3-yl)-1,3,5-triazine-2,4-diyl)dimorpholine (**21**):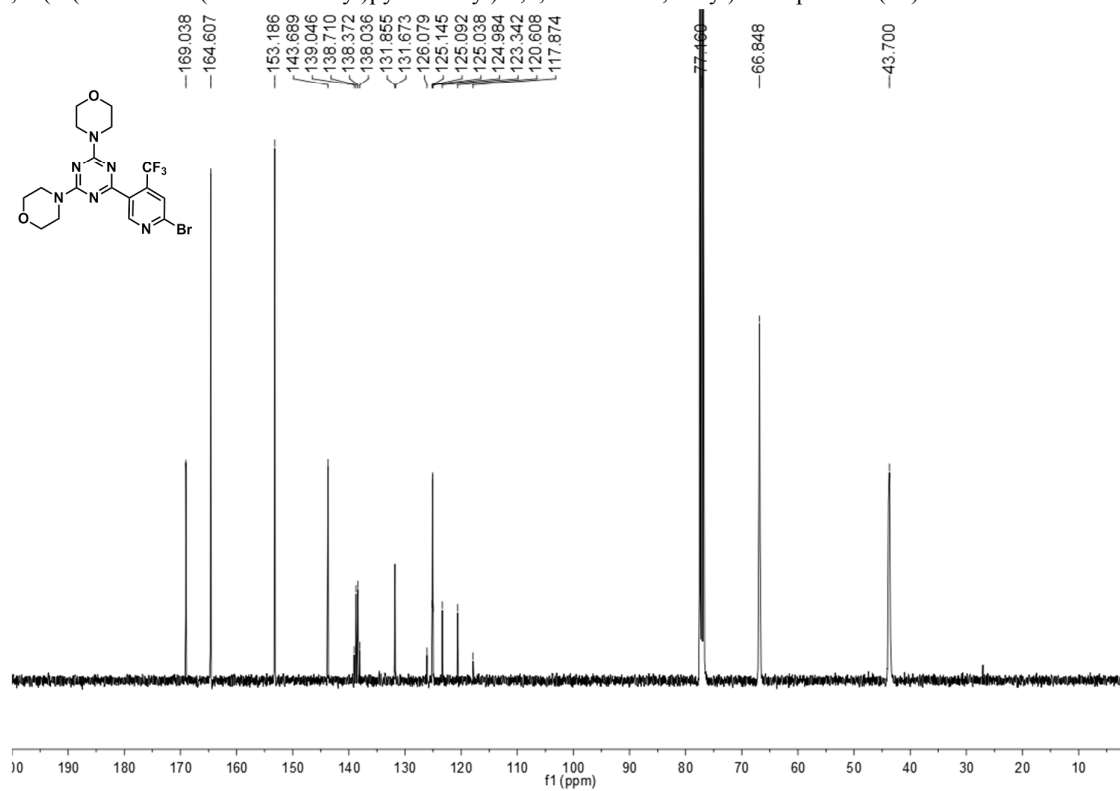

**ESI-HRMS Spectra:**5-(4,6-Dimorpholino-1,3,5-triazin-2-yl)-4-(trifluoromethyl)pyrimidin-2-amine (**2**):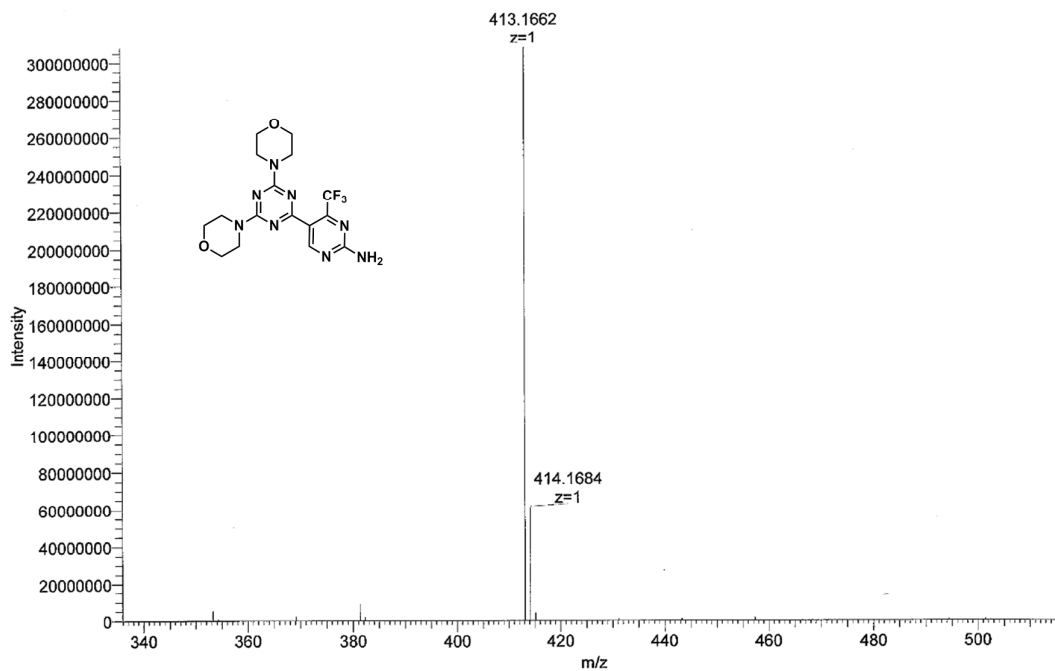5-(4,6-Dimorpholino-1,3,5-triazin-2-yl)pyridin-2-amine (**10**):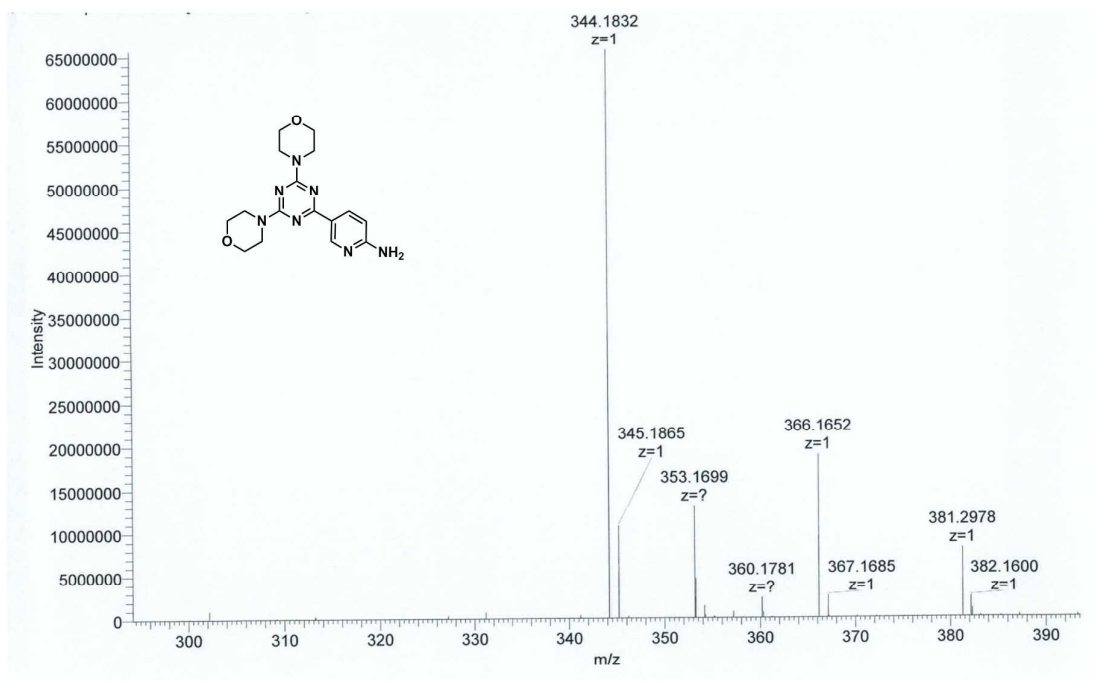

5-(4,6-Dimorpholino-1,3,5-triazin-2-yl)pyrimidin-2-amine (**11**):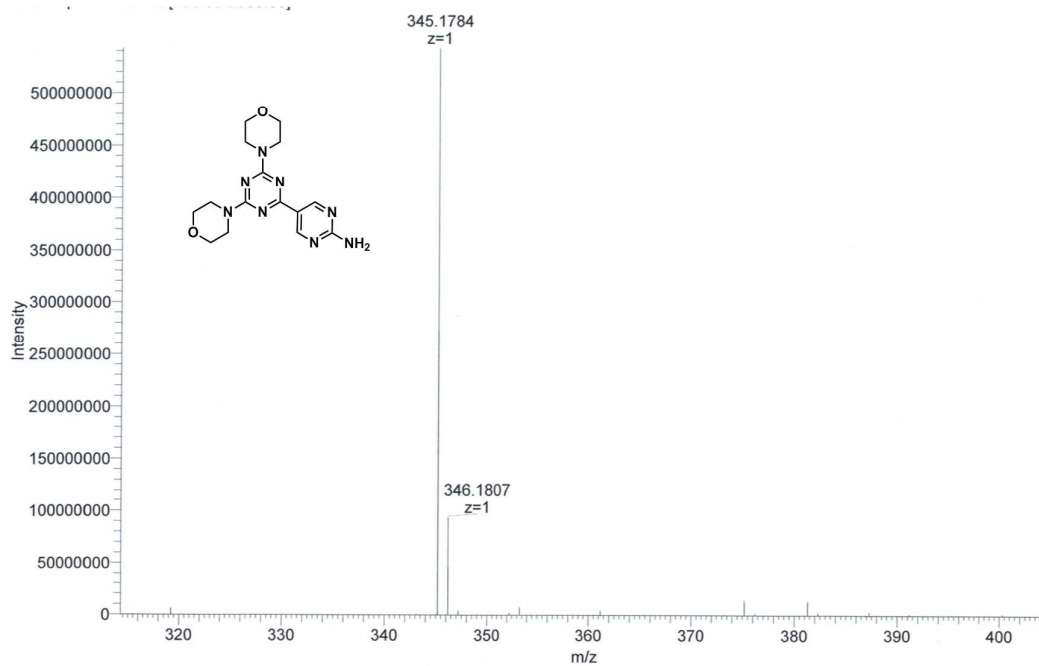5-(4,6-Dimorpholino-1,3,5-triazin-2-yl)pyrazin-2-amine (**12**):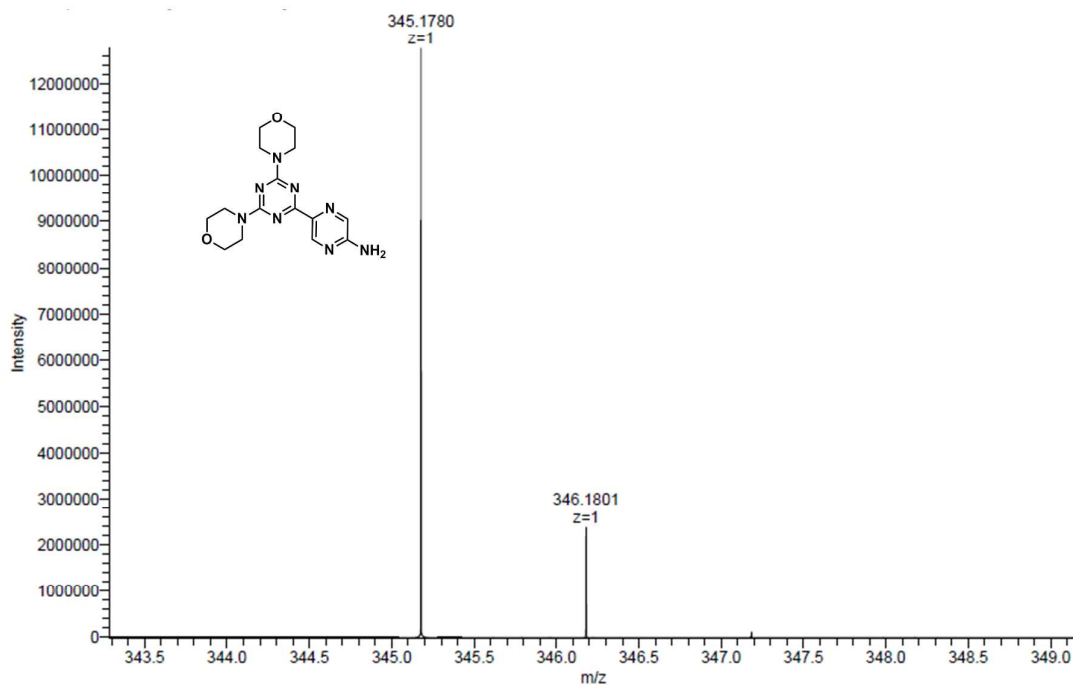

5-(4,6-Dimorpholino-1,3,5-triazin-2-yl)-4-methylpyridin-2-amine (**13**):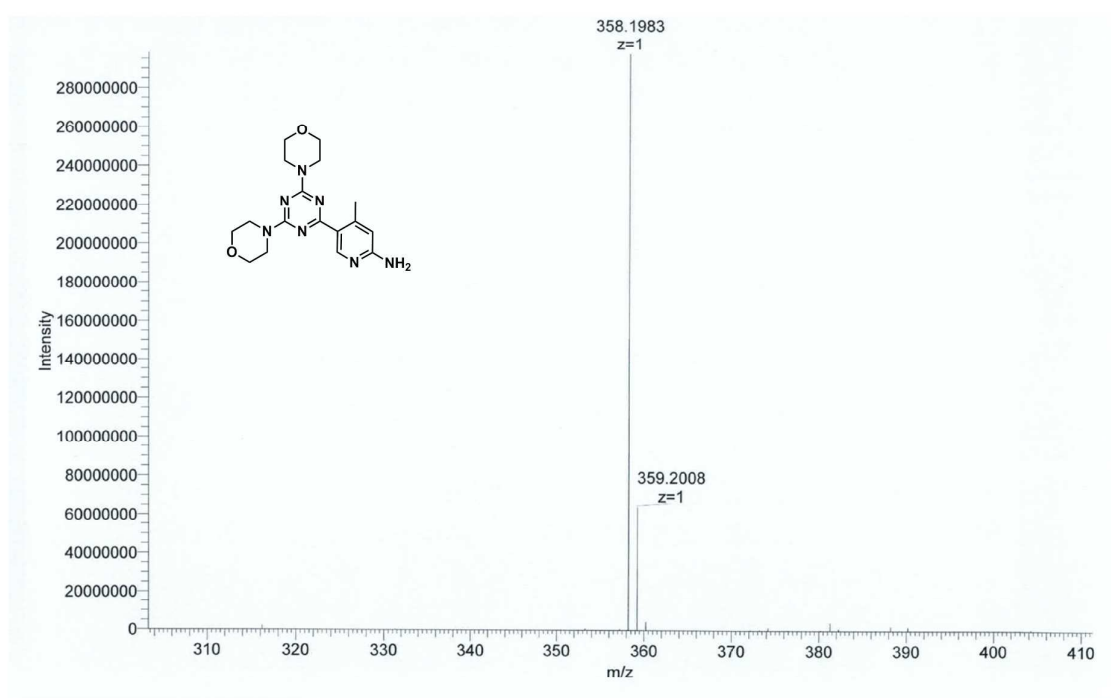5-(4,6-Dimorpholino-1,3,5-triazin-2-yl)-3-methylpyridin-2-amine (**14**):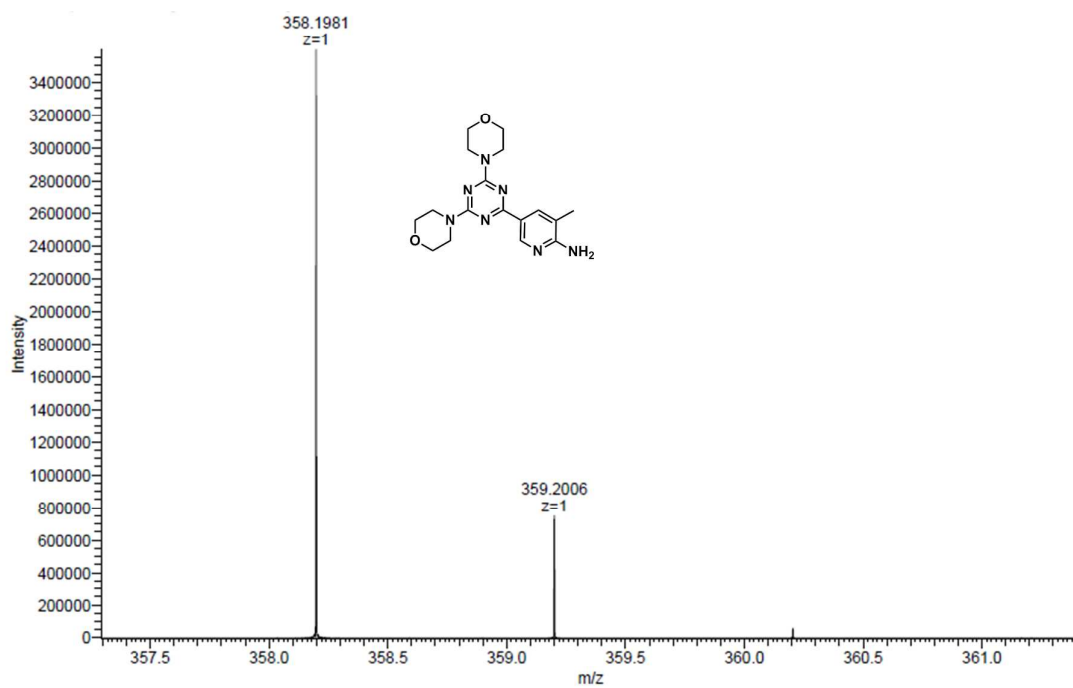



5-(4,6-Dimorpholino-1,3,5-triazin-2-yl)-3-(trifluoromethyl)pyridin-2-amine (**15**):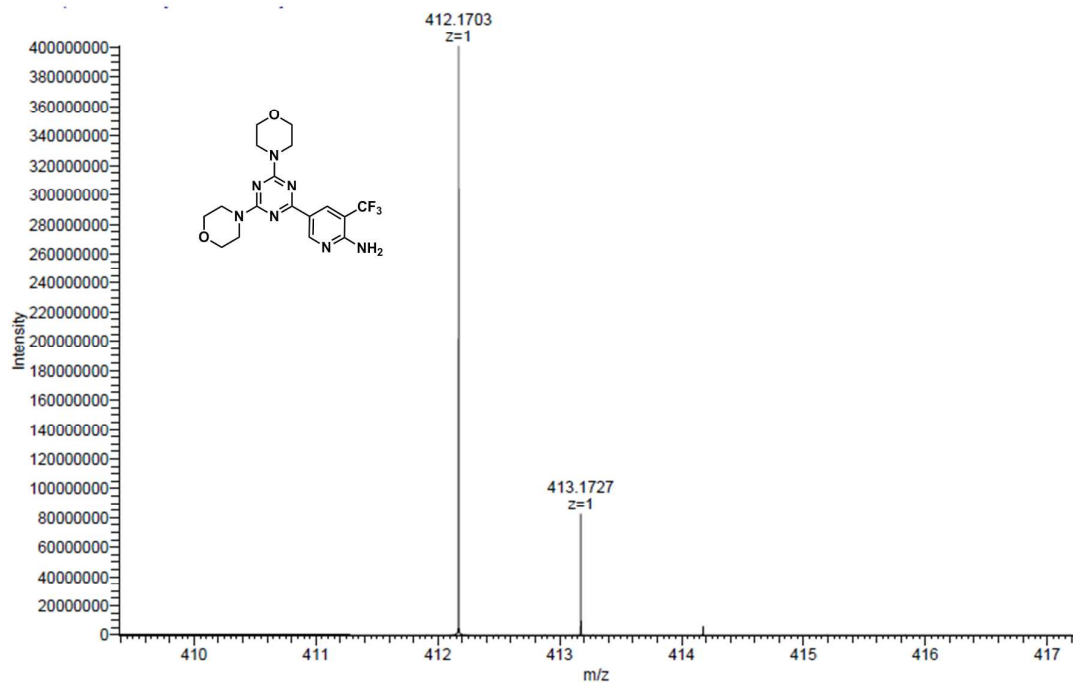5-(4,6-Dimorpholino-1,3,5-triazin-2-yl)-4-methylpyrimidin-2-amine (**16**):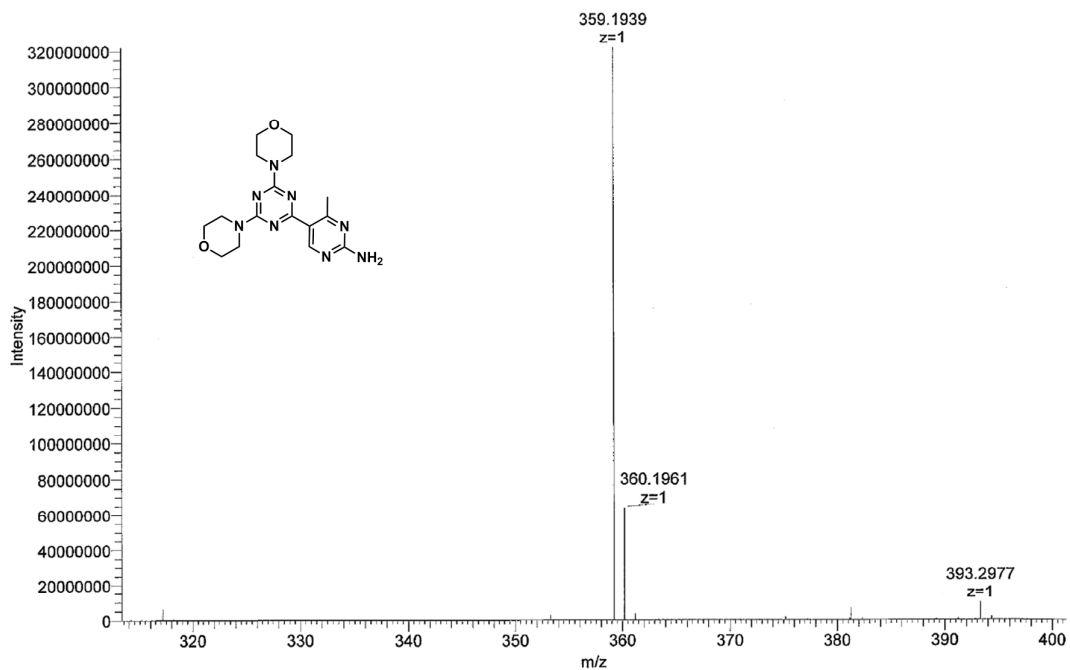

**N-(5-(4,6-Dimorpholino-1,3,5-triazin-2-yl)-4-(trifluoromethyl)pyridin-2-yl)acetamide (17):**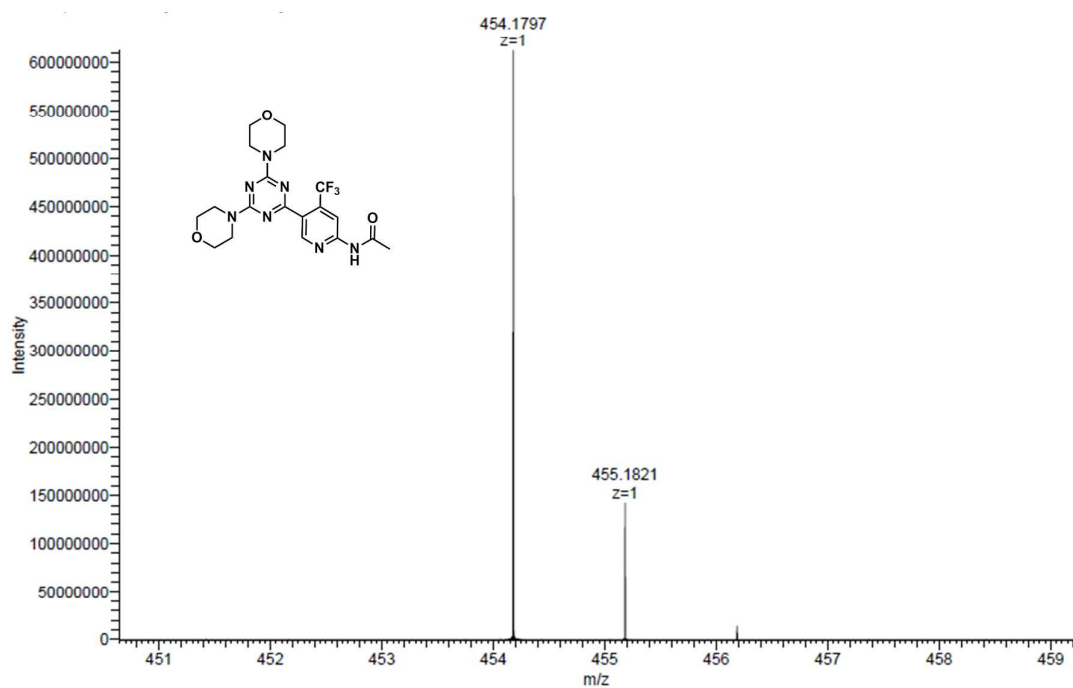**5-(4,6-Dimorpholino-1,3,5-triazin-2-yl)-4-(trifluoromethyl)pyridin-2-ol (18):**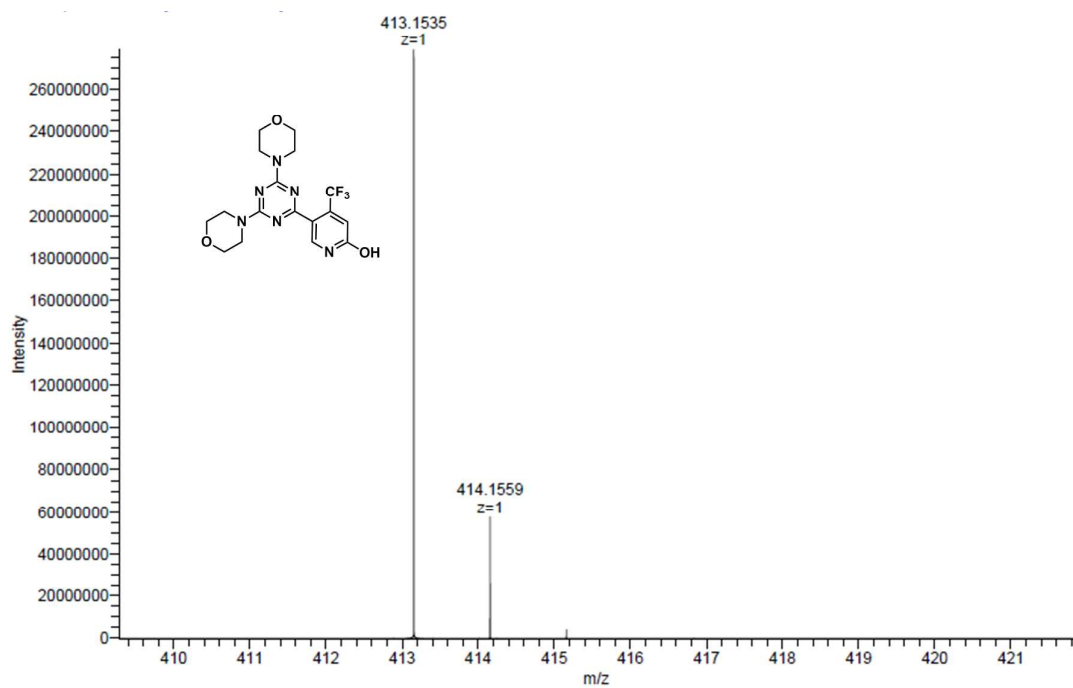

4,4'-(6-(6-Chloro-4-(trifluoromethyl)pyridin-3-yl)-1,3,5-triazine-2,4-diyl)dimorpholine (**19**):

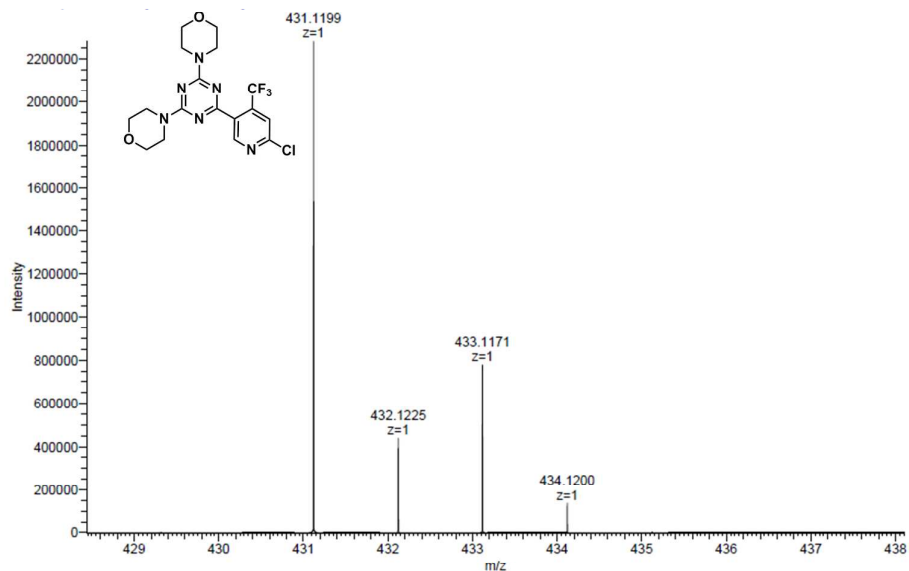

*N*-(5-(4,6-Dimorpholino-1,3,5-triazin-2-yl)-4-(trifluoromethyl)pyridin-2-yl)-*O*-methylhydroxylamine (**20**):

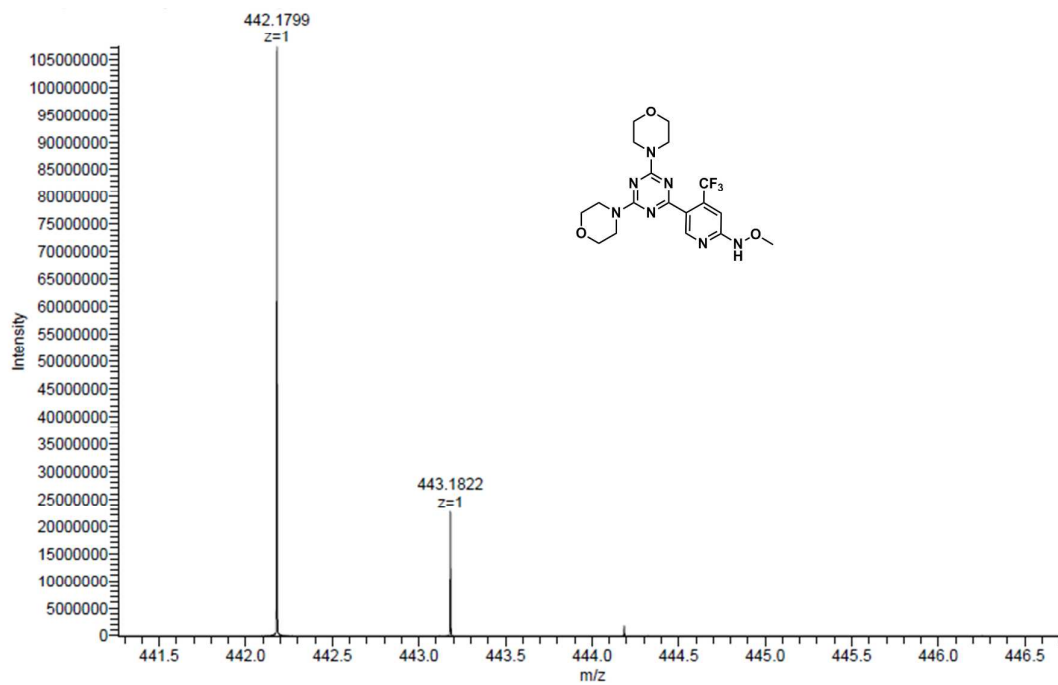

4,4'-(6-(6-Bromo-4-(trifluoromethyl)pyridin-3-yl)-1,3,5-triazine-2,4-diyl)dimorpholine (**21**):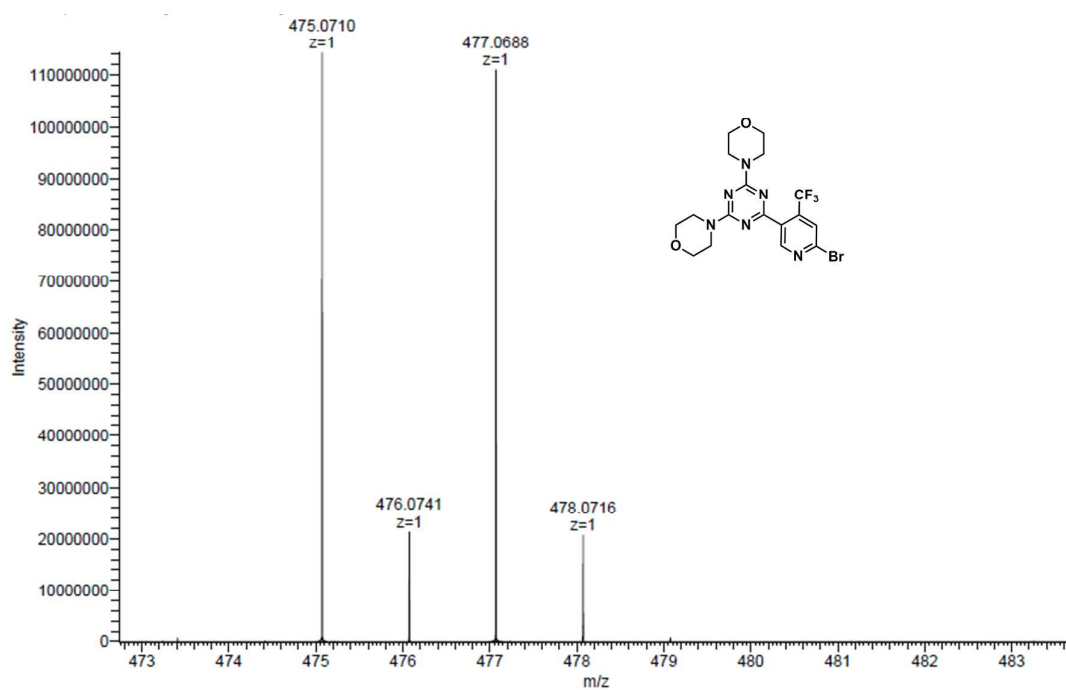

**MALDI-MS Spectra.**4,4'-(6-Iodo-1,3,5-triazine-2,4-diyl)dimorpholine (**8**):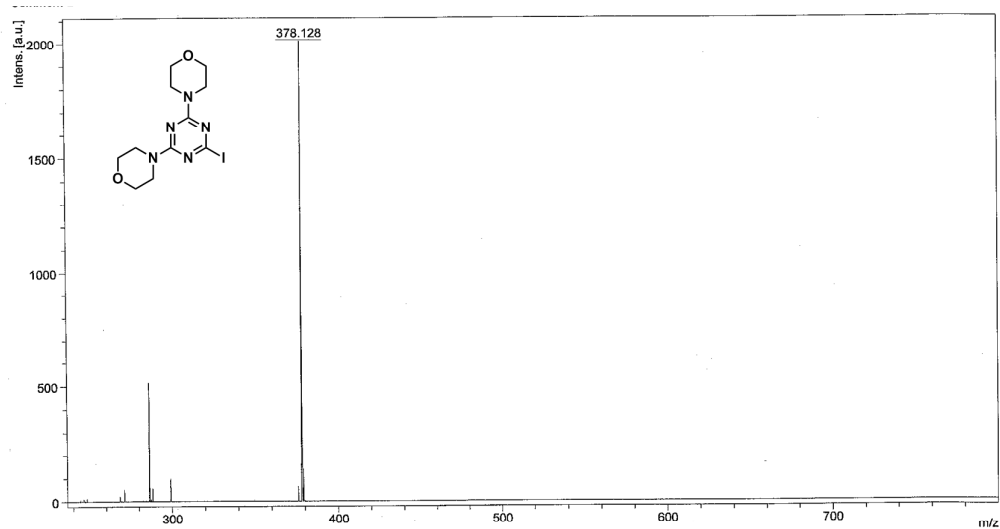4-(4,6-Dimorpholino-1,3,5-triazin-2-yl)aniline (**9**):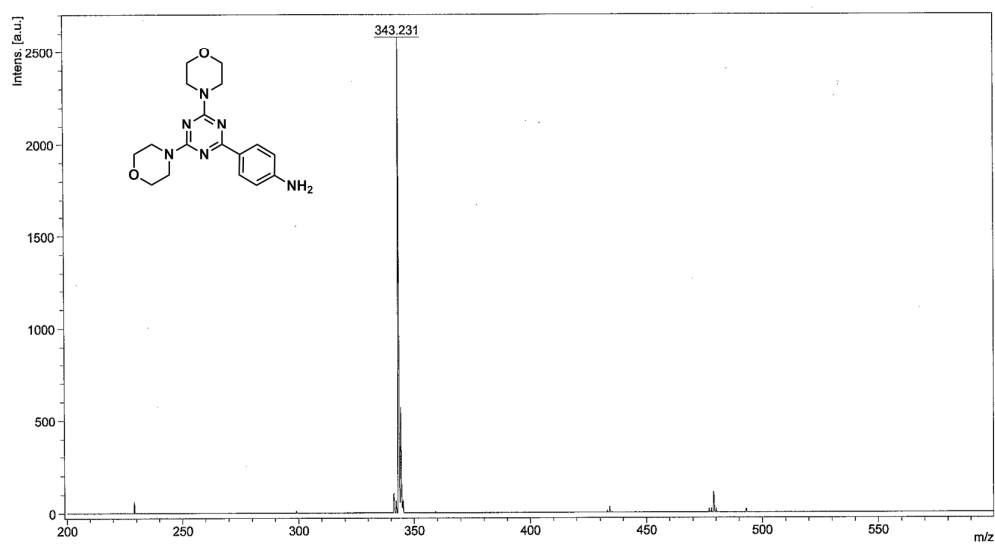

**HPLC Chromatograms.**

5-(4,6-Dimorpholino-1,3,5-triazin-2-yl)-4-(trifluoromethyl)pyrimidin-2-amine (2):

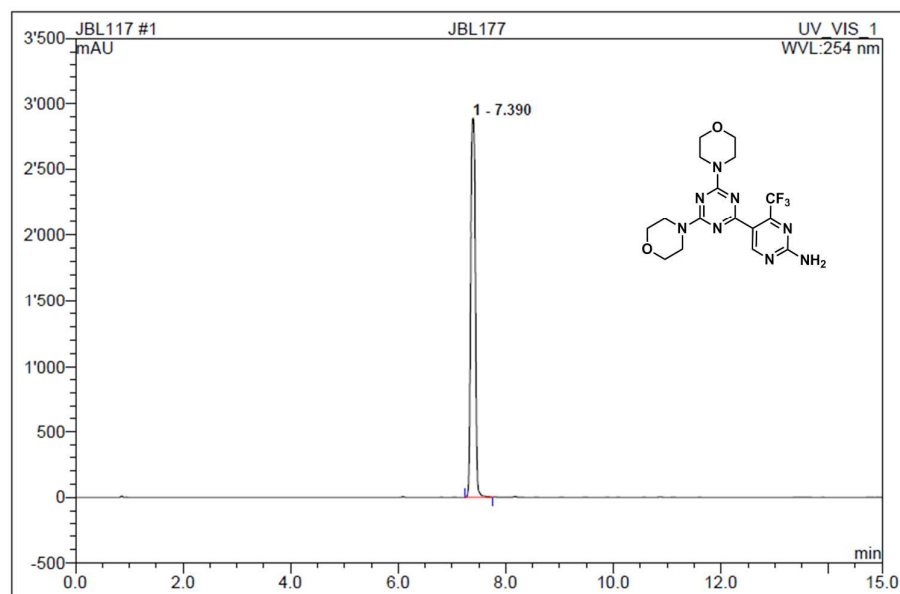

| No.           | Ret.Time<br>min | Peak Name | Height<br>mAU | Area<br>mAU*min | Rel.Area<br>% | Type  |
|---------------|-----------------|-----------|---------------|-----------------|---------------|-------|
| 1             | 7.39            | n.a.      | 2888.195      | 287.191         | 100.00        | BMB   |
| <b>Total:</b> |                 |           | 2888.195      | 287.191         | 100.00        | #REF! |

4-(4,6-Dimorpholino-1,3,5-triazin-2-yl)aniline (9):

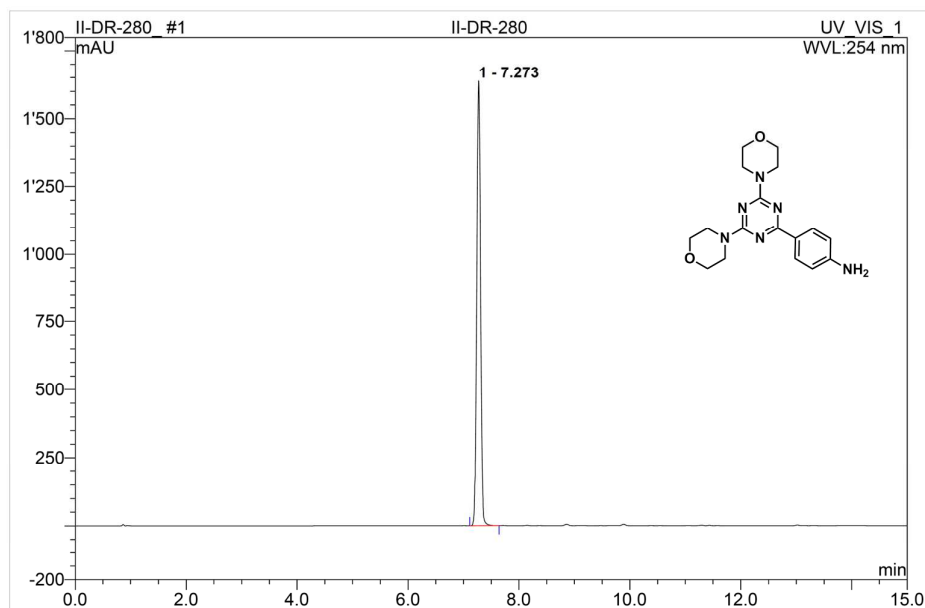

| No.           | Ret.Time<br>min | Peak Name | Height<br>mAU | Area<br>mAU*min | Rel.Area<br>% | Type  |
|---------------|-----------------|-----------|---------------|-----------------|---------------|-------|
| 1             | 7.27            | n.a.      | 1637.555      | 129.426         | 100.00        | BMB   |
| <b>Total:</b> |                 |           | 1637.555      | 129.426         | 100.00        | #REF! |

5-(4,6-Dimorpholino-1,3,5-triazin-2-yl)pyridin-2-amine (**10**):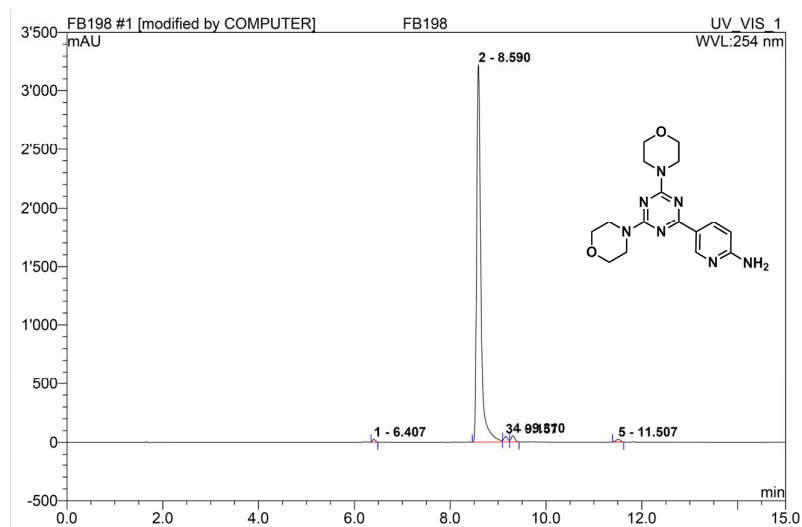

| No.           | Ret.Time<br>min | Peak Name | Height<br>mAU | Area<br>mAU*min | Rel.Area<br>% | Type  |
|---------------|-----------------|-----------|---------------|-----------------|---------------|-------|
| 1             | 6.41            | n.a.      | 21.807        | 1.574           | 0.46          | BMB*  |
| 2             | 8.59            | n.a.      | 3223.180      | 328.869         | 96.20         | BM *  |
| 3             | 9.16            | n.a.      | 48.055        | 4.301           | 1.26          | M *   |
| 4             | 9.31            | n.a.      | 51.803        | 4.665           | 1.36          | MB*   |
| 5             | 11.51           | n.a.      | 22.519        | 2.445           | 0.72          | BMB*  |
| <b>Total:</b> |                 |           | 3367.363      | 341.855         | 100.00        | #REF! |

5-(4,6-Dimorpholino-1,3,5-triazin-2-yl)pyrimidin-2-amine (**11**):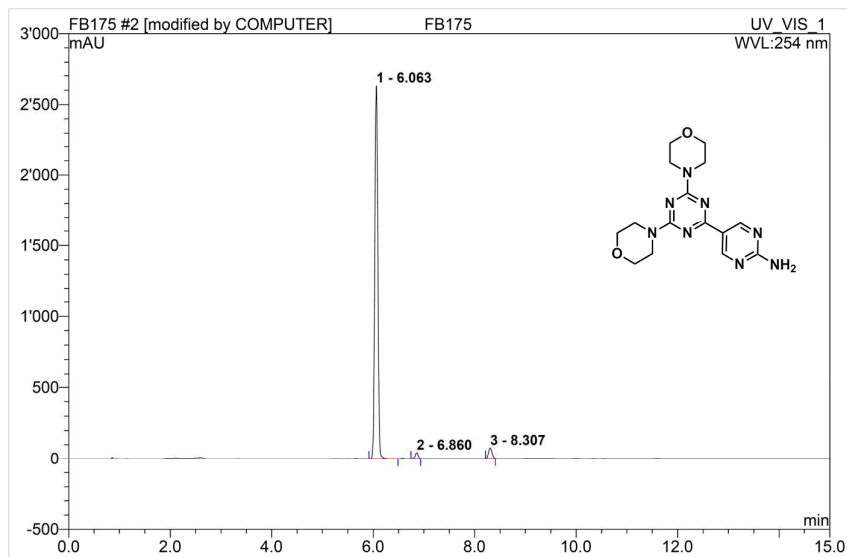

| No.           | Ret.Time<br>min | Peak Name | Height<br>mAU | Area<br>mAU*min | Rel.Area<br>% | Type  |
|---------------|-----------------|-----------|---------------|-----------------|---------------|-------|
| 1             | 6.06            | n.a.      | 2629.845      | 182.817         | 95.37         | BMB   |
| 2             | 6.86            | n.a.      | 42.345        | 2.857           | 1.49          | BMB*  |
| 3             | 8.31            | n.a.      | 75.155        | 6.013           | 3.14          | BMB*  |
| <b>Total:</b> |                 |           | 2747.345      | 191.688         | 100.00        | #REF! |

5-(4,6-Dimorpholino-1,3,5-triazin-2-yl)pyrazin-2-amine (**12**):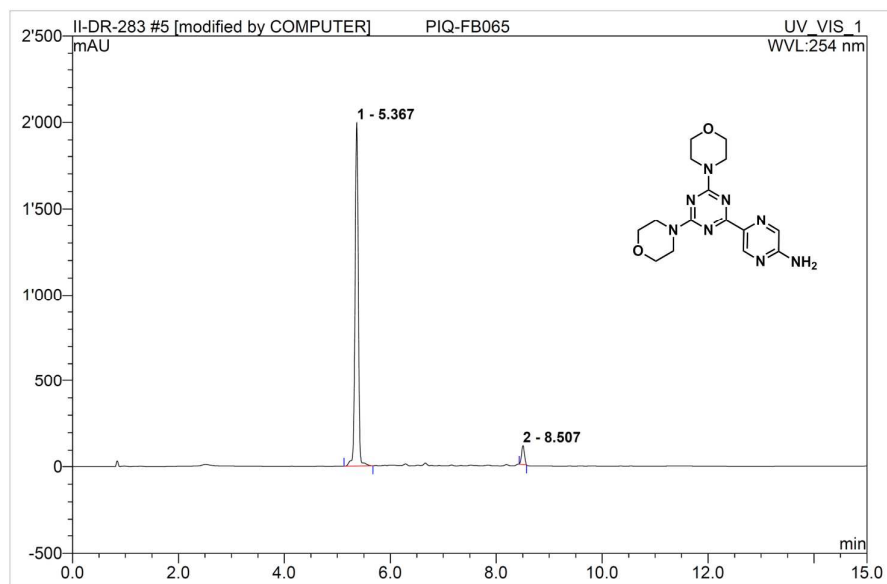

| No.           | Ret. Time<br>min | Peak Name | Height<br>mAU | Area<br>mAU*min | Rel. Area<br>% | Type  |
|---------------|------------------|-----------|---------------|-----------------|----------------|-------|
| 1             | 5.37             | n.a.      | 1996.681      | 142.003         | 95.24          | BMB   |
| 2             | 8.51             | n.a.      | 115.274       | 7.102           | 4.76           | BMB*  |
| <b>Total:</b> |                  |           | 2111.956      | 149.105         | 100.00         | #REF! |

5-(4,6-Dimorpholino-1,3,5-triazin-2-yl)-4-methylpyridin-2-amine (**13**):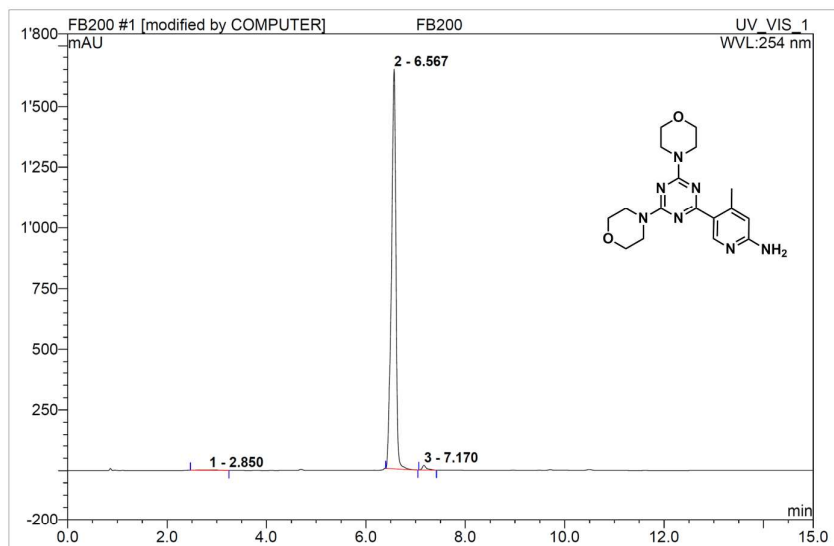

| No.           | Ret. Time<br>min | Peak Name | Height<br>mAU | Area<br>mAU*min | Rel. Area<br>% | Type  |
|---------------|------------------|-----------|---------------|-----------------|----------------|-------|
| 1             | 2.85             | n.a.      | 1.404         | 0.651           | 0.37           | BMB*  |
| 2             | 6.57             | n.a.      | 1645.160      | 171.658         | 98.52          | BMB   |
| 3             | 7.17             | n.a.      | 18.749        | 1.926           | 1.11           | BMB   |
| <b>Total:</b> |                  |           | 1665.312      | 174.236         | 100.00         | #REF! |



5-(4,6-Dimorpholino-1,3,5-triazin-2-yl)-3-methylpyridin-2-amine (**14**):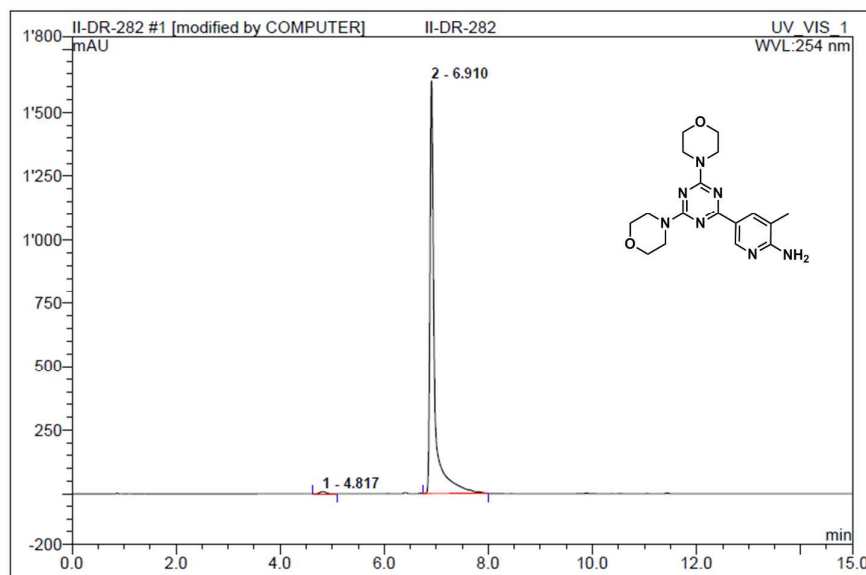

| No.           | Ret.Time<br>min | Peak Name | Height<br>mAU | Area<br>mAU*min | Rel.Area<br>% | Type  |
|---------------|-----------------|-----------|---------------|-----------------|---------------|-------|
| 1             | 4.82            | n.a.      | 8.347         | 1.155           | 0.70          | BMB   |
| 2             | 6.91            | n.a.      | 1620.594      | 164.284         | 99.30         | BMB*  |
| <b>Total:</b> |                 |           | 1628.940      | 165.439         | 100.00        | #REF! |

5-(4,6-Dimorpholino-1,3,5-triazin-2-yl)-3-(trifluoromethyl)pyridin-2-amine (**15**):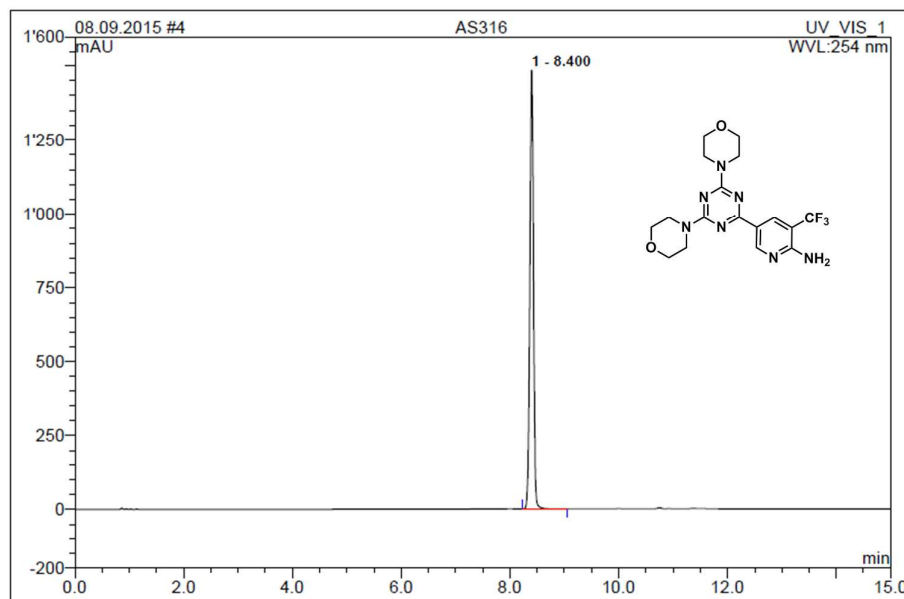

| No.           | Ret.Time<br>min | Peak Name | Height<br>mAU | Area<br>mAU*min | Rel.Area<br>% | Type  |
|---------------|-----------------|-----------|---------------|-----------------|---------------|-------|
| 1             | 8.40            | n.a.      | 1484.296      | 115.716         | 100.00        | BMB   |
| <b>Total:</b> |                 |           | 1484.296      | 115.716         | 100.00        | #REF! |

5-(4,6-Dimorpholino-1,3,5-triazin-2-yl)-4-methylpyrimidin-2-amine (**16**):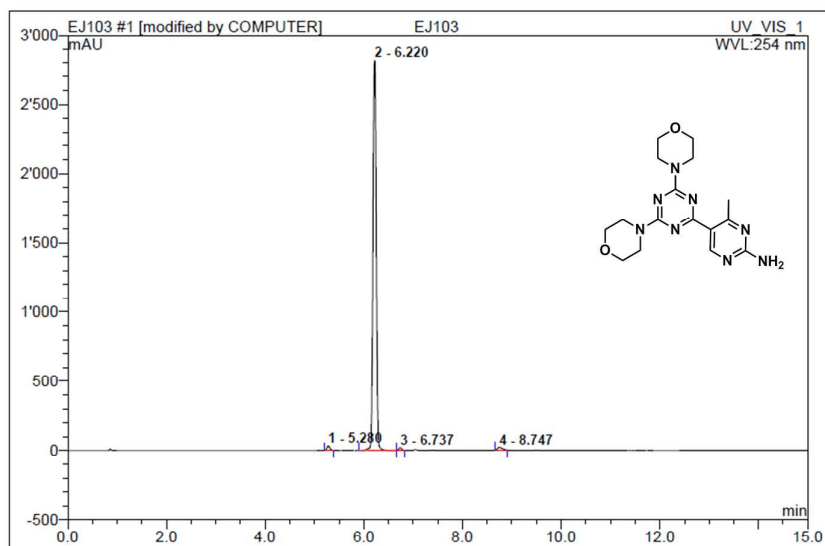

| No.           | Ret.Time<br>min | Peak Name | Height<br>mAU | Area<br>mAU*min | Rel.Area<br>% | Type  |
|---------------|-----------------|-----------|---------------|-----------------|---------------|-------|
| 1             | 5.28            | n.a.      | 32.626        | 2.234           | 1.00          | BMB*  |
| 2             | 6.22            | n.a.      | 2821.225      | 216.587         | 97.34         | BM *  |
| 3             | 6.74            | n.a.      | 20.354        | 1.341           | 0.60          | MB*   |
| 4             | 8.75            | n.a.      | 19.730        | 2.336           | 1.05          | BMB*  |
| <b>Total:</b> |                 |           | 2893.935      | 222.498         | 100.00        | #REF! |

*N*-(5-(4,6-Dimorpholino-1,3,5-triazin-2-yl)-4-(trifluoromethyl)pyridin-2-yl)acetamide (**17**):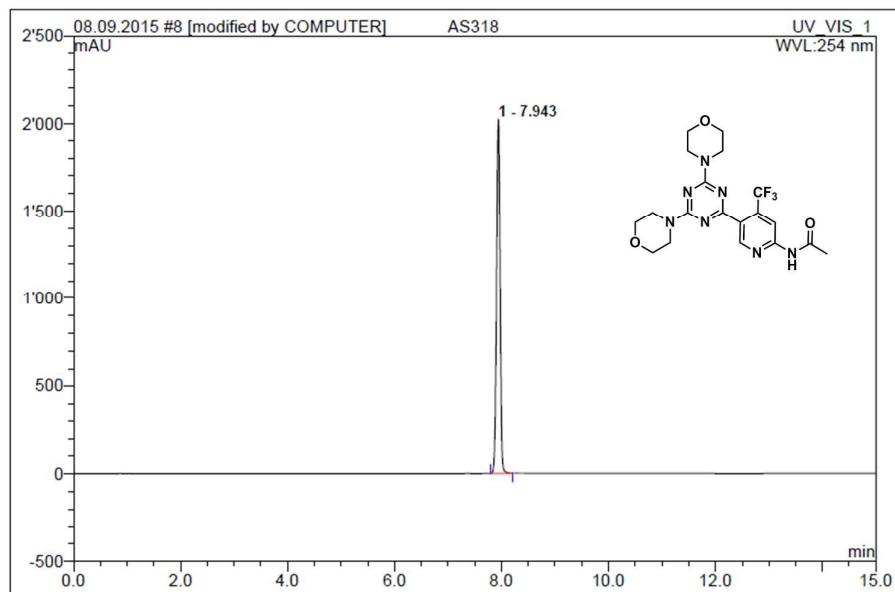

| No.           | Ret.Time<br>min | Peak Name | Height<br>mAU | Area<br>mAU*min | Rel.Area<br>% | Type  |
|---------------|-----------------|-----------|---------------|-----------------|---------------|-------|
| 1             | 7.94            | n.a.      | 2022.288      | 157.304         | 100.00        | BMB   |
| <b>Total:</b> |                 |           | 2022.288      | 157.304         | 100.00        | #REF! |

5-(4,6-Dimorpholino-1,3,5-triazin-2-yl)-4-(trifluoromethyl)pyridin-2-ol (**18**):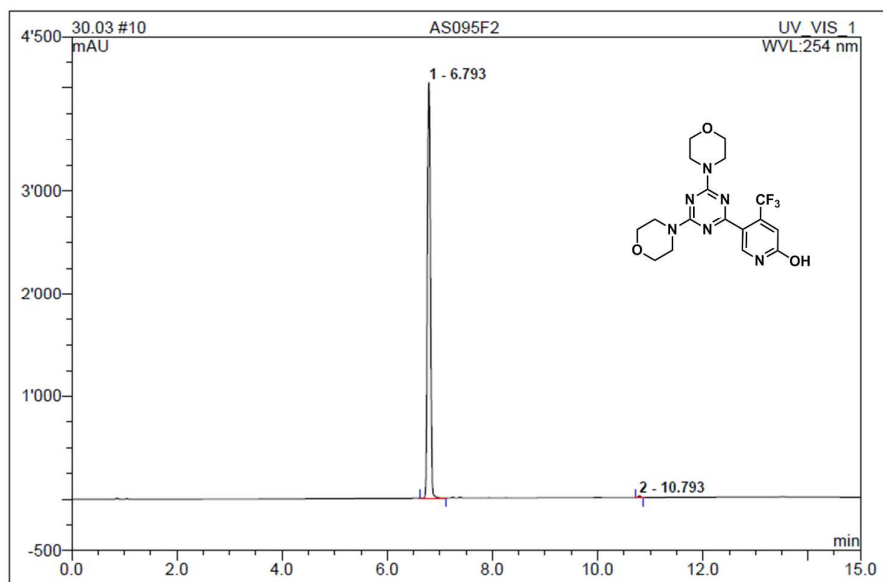

| No.           | Ret.Time<br>min | Peak Name | Height<br>mAU | Area<br>mAU*min | Rel.Area<br>% | Type  |
|---------------|-----------------|-----------|---------------|-----------------|---------------|-------|
| 1             | 6.79            | n.a.      | 4038.876      | 274.306         | 99.63         | BMB   |
| 2             | 10.79           | n.a.      | 17.907        | 1.016           | 0.37          | BMB   |
| <b>Total:</b> |                 |           | 4056.783      | 275.322         | 100.00        | #REF! |

4,4'-(6-(6-Chloro-4-(trifluoromethyl)pyridin-3-yl)-1,3,5-triazine-2,4-diyl)dimorpholine (**19**):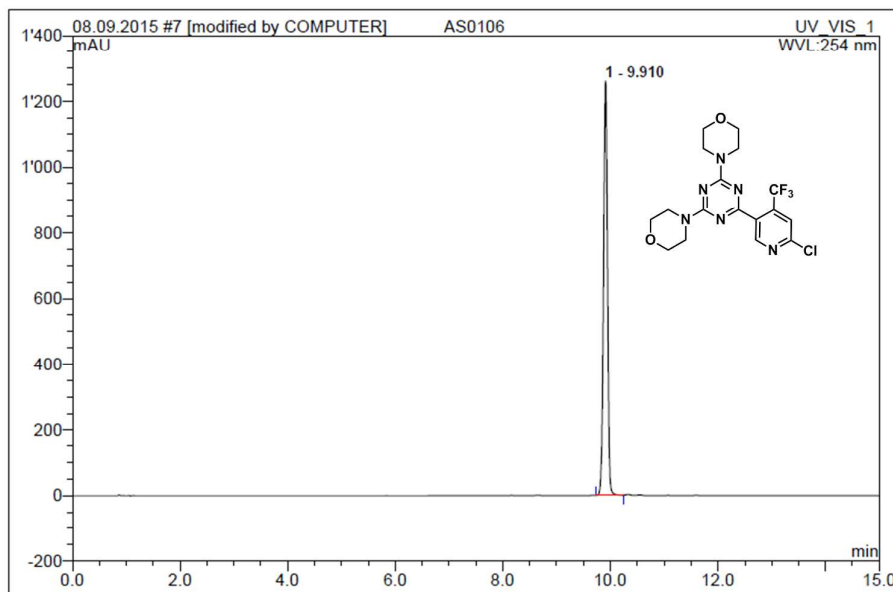

| No.           | Ret.Time<br>min | Peak Name | Height<br>mAU | Area<br>mAU*min | Rel.Area<br>% | Type  |
|---------------|-----------------|-----------|---------------|-----------------|---------------|-------|
| 1             | 9.91            | n.a.      | 1260.721      | 108.798         | 100.00        | BMB   |
| <b>Total:</b> |                 |           | 1260.721      | 108.798         | 100.00        | #REF! |

*N*-(5-(4,6-Dimorpholino-1,3,5-triazin-2-yl)-4-(trifluoromethyl)pyridin-2-yl)-*O*-methylhydroxylamine (**20**):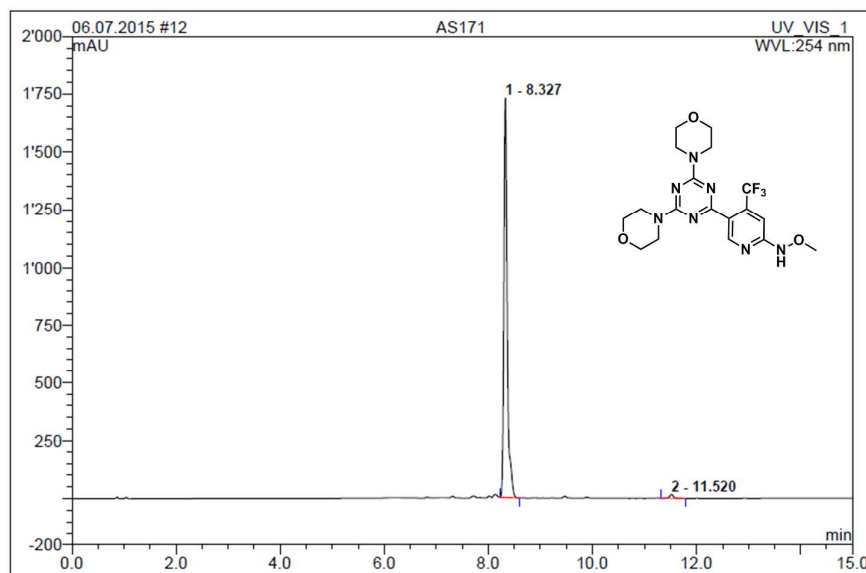

| No.           | Ret.Time<br>min | Peak Name | Height<br>mAU | Area<br>mAU*min | Rel.Area<br>% | Type  |
|---------------|-----------------|-----------|---------------|-----------------|---------------|-------|
| 1             | 8.33            | n.a.      | 1727.149      | 128.359         | 98.89         | BMB   |
| 2             | 11.52           | n.a.      | 16.504        | 1.435           | 1.11          | BMB   |
| <b>Total:</b> |                 |           | 1743.653      | 129.795         | 100.00        | #REF! |

4,4'-(6-(6-Bromo-4-(trifluoromethyl)pyridin-3-yl)-1,3,5-triazine-2,4-diyl)dimorpholine (**21**):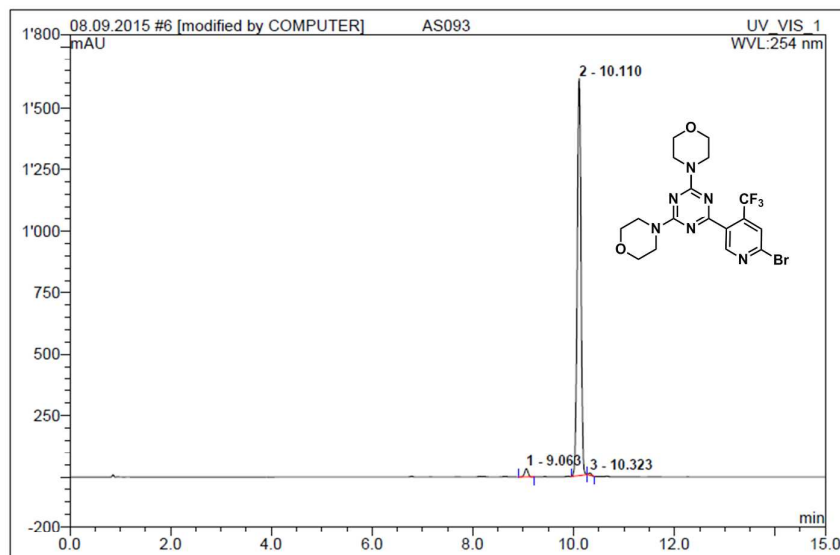

| No.           | Ret.Time<br>min | Peak Name | Height<br>mAU | Area<br>mAU*min | Rel.Area<br>% | Type  |
|---------------|-----------------|-----------|---------------|-----------------|---------------|-------|
| 1             | 9.06            | n.a.      | 32.610        | 2.563           | 1.81          | BMB   |
| 2             | 10.11           | n.a.      | 1611.287      | 138.839         | 97.78         | BMB   |
| 3             | 10.32           | n.a.      | 8.916         | 0.592           | 0.42          | BMB*  |
| <b>Total:</b> |                 |           | 1652.812      | 141.995         | 100.00        | #REF! |

## Appendix 1: collected chemical formulas

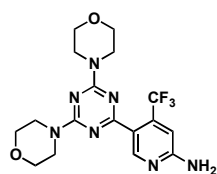

1 (PQR309)

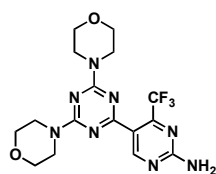

2

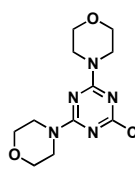

7

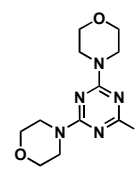

8

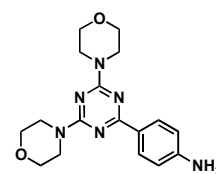

9

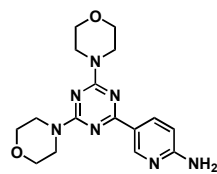

10

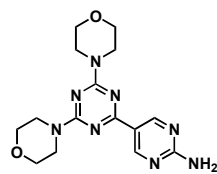

11

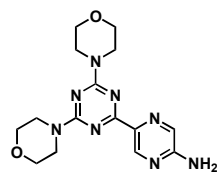

12

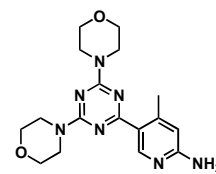

13

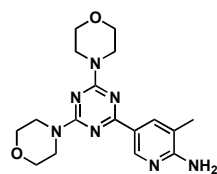

14

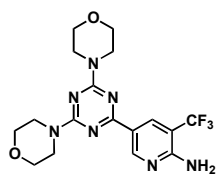

15

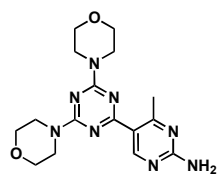

16

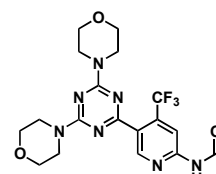

17

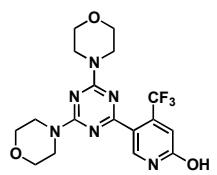

18

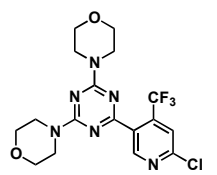

19

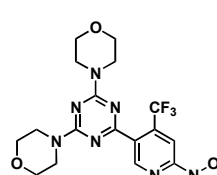

20

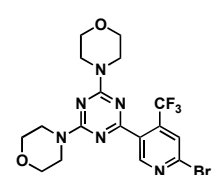

21

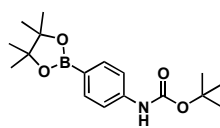

22

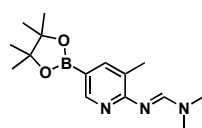

23

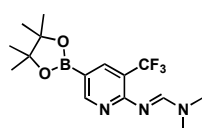

24
